# Supplementary material
Source: publisher figshare collection journal article supplement (https://plos.figshare.com/articles/dataset/_/1612629)
Supplement: Supplementary file 1 [file 1]

Archive with 18 entries (18 files):
- S1_Fig.pdf
- S2_Fig.pdf
- S3_Fig.pdf
- S4_Fig.pdf
- S5_Fig.png
- S6_Fig.pdf
- S7_Fig.pdf
- S8_Fig.png
- S9_Fig.pdf
- S10_Fig.pdf
- S11_Fig.png
- S12_Fig.pdf
- S13_Fig.pdf
- S14_Fig.pdf
- S15_Fig.pdf
- S16_Fig.pdf
- S17_Fig.pdf
- S18_Fig.pdf
