# Supplementary material
Source: publisher figshare collection journal article supplement (https://plos.figshare.com/articles/dataset/_/1612629)

# Abl

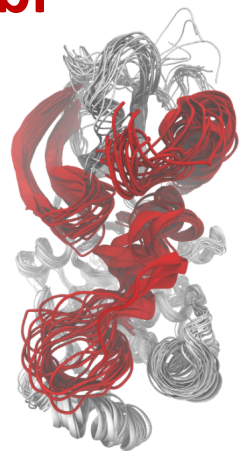

## G250E

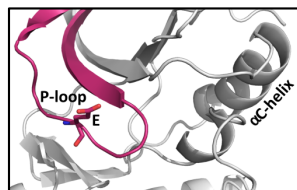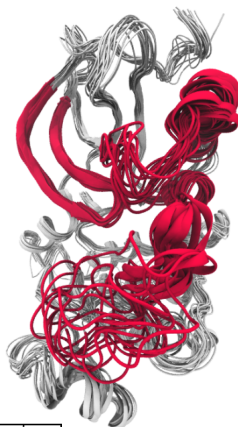

## E279K

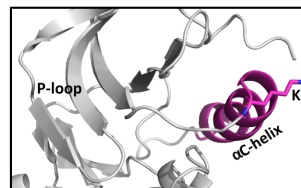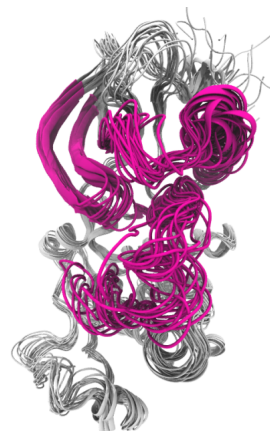

## H396P

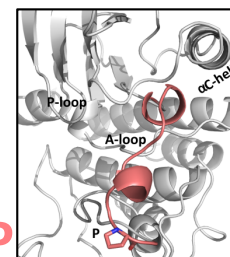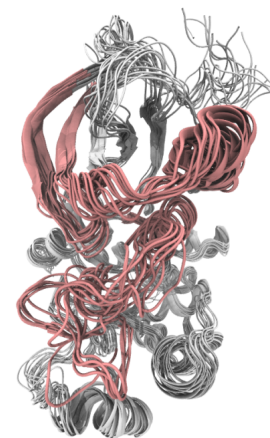

# Src

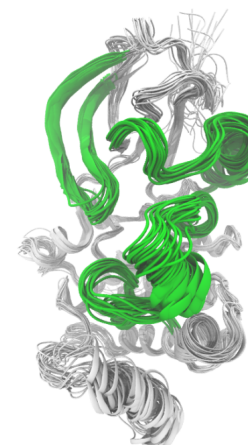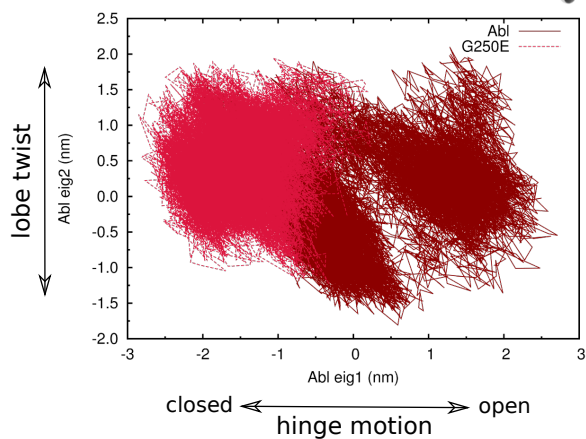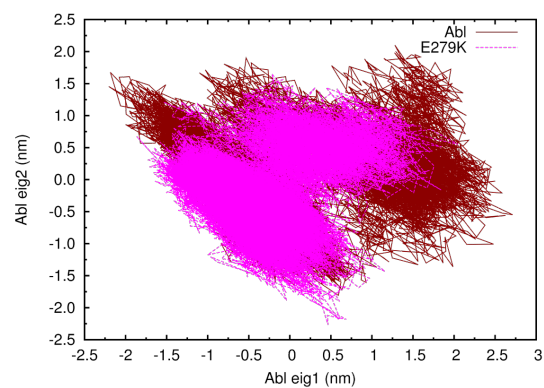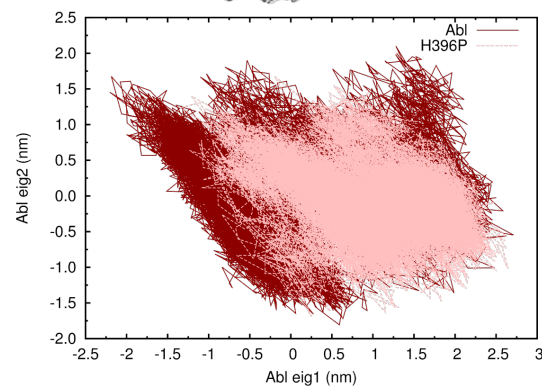

Supplement: Supplementary file [file 1]
