# Supplementary material
Source: publisher figshare collection journal article supplement (https://plos.figshare.com/articles/dataset/_/1612629)

a

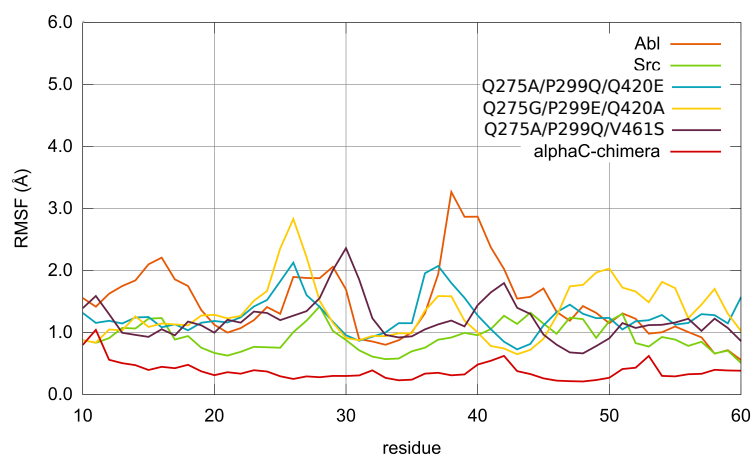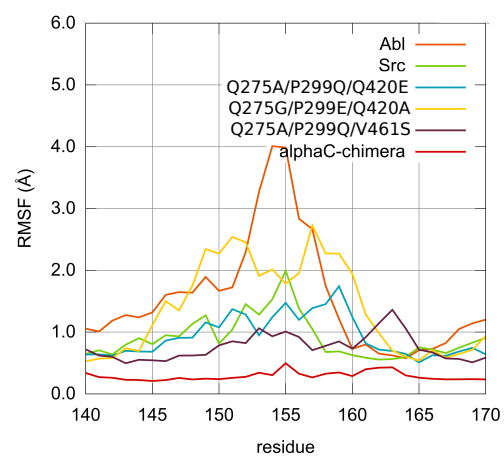

b

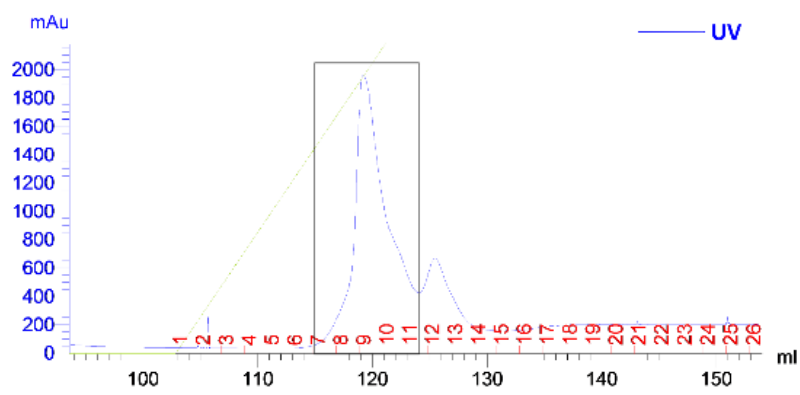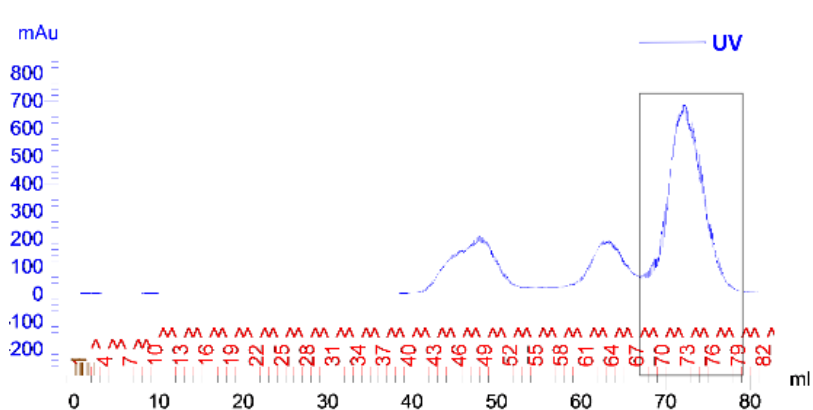

c

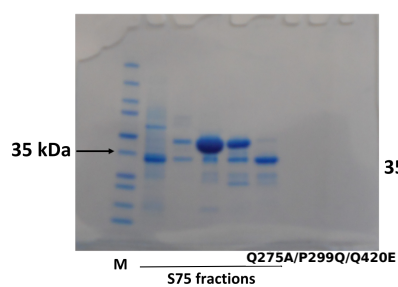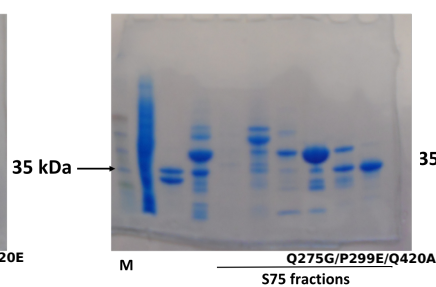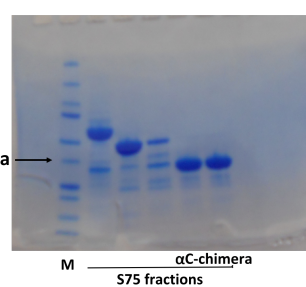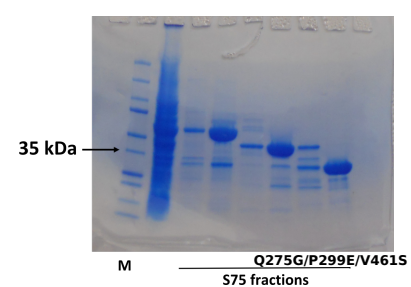

d

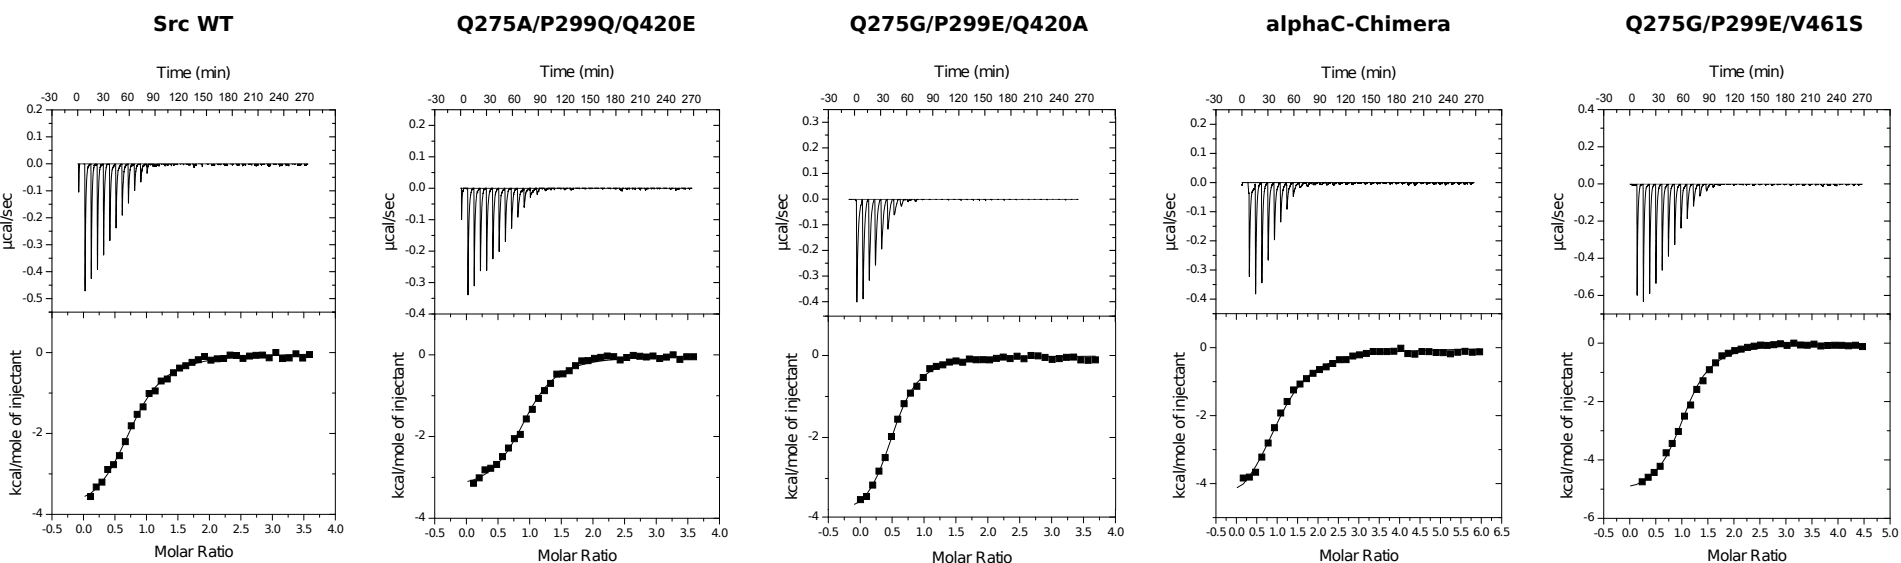

Supplement: Supplementary file [file 1]
