# Supplementary material
Source: publisher figshare collection journal article supplement (https://plos.figshare.com/articles/dataset/_/1612629)

a

Type I

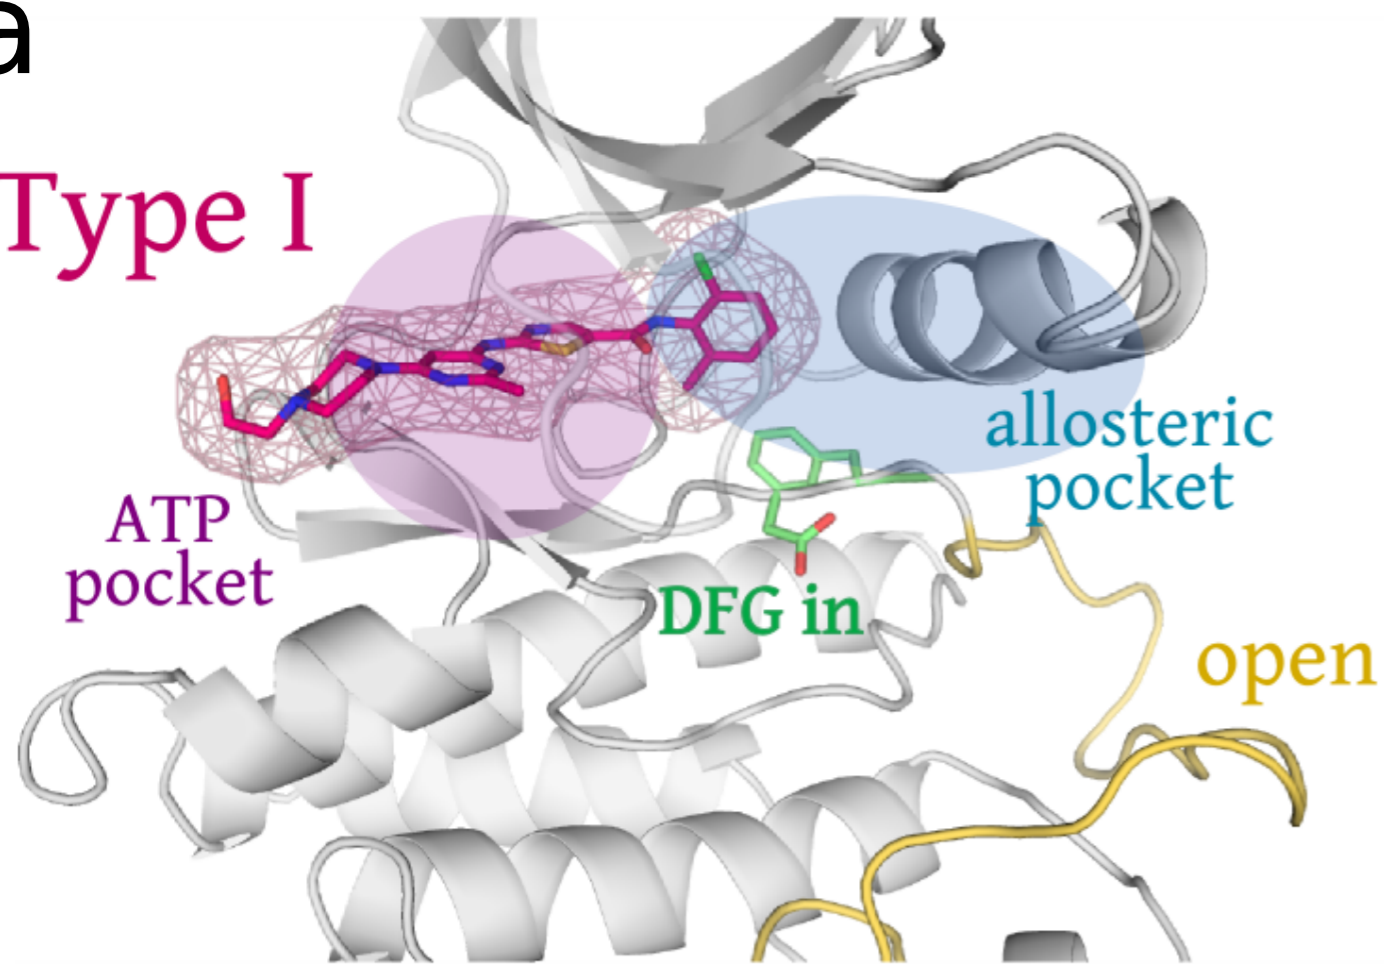

Type II

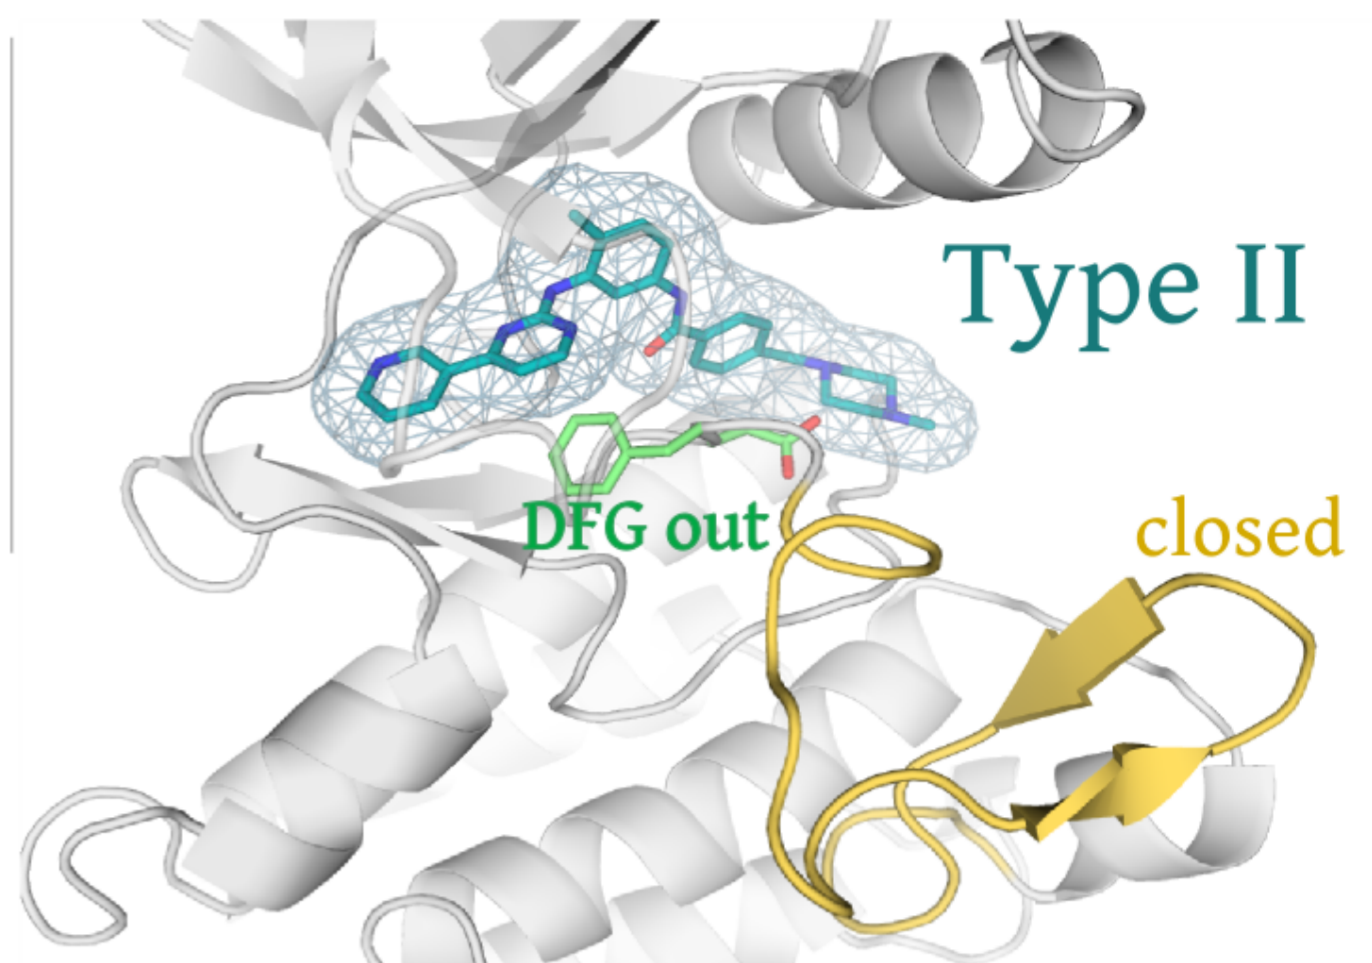

b

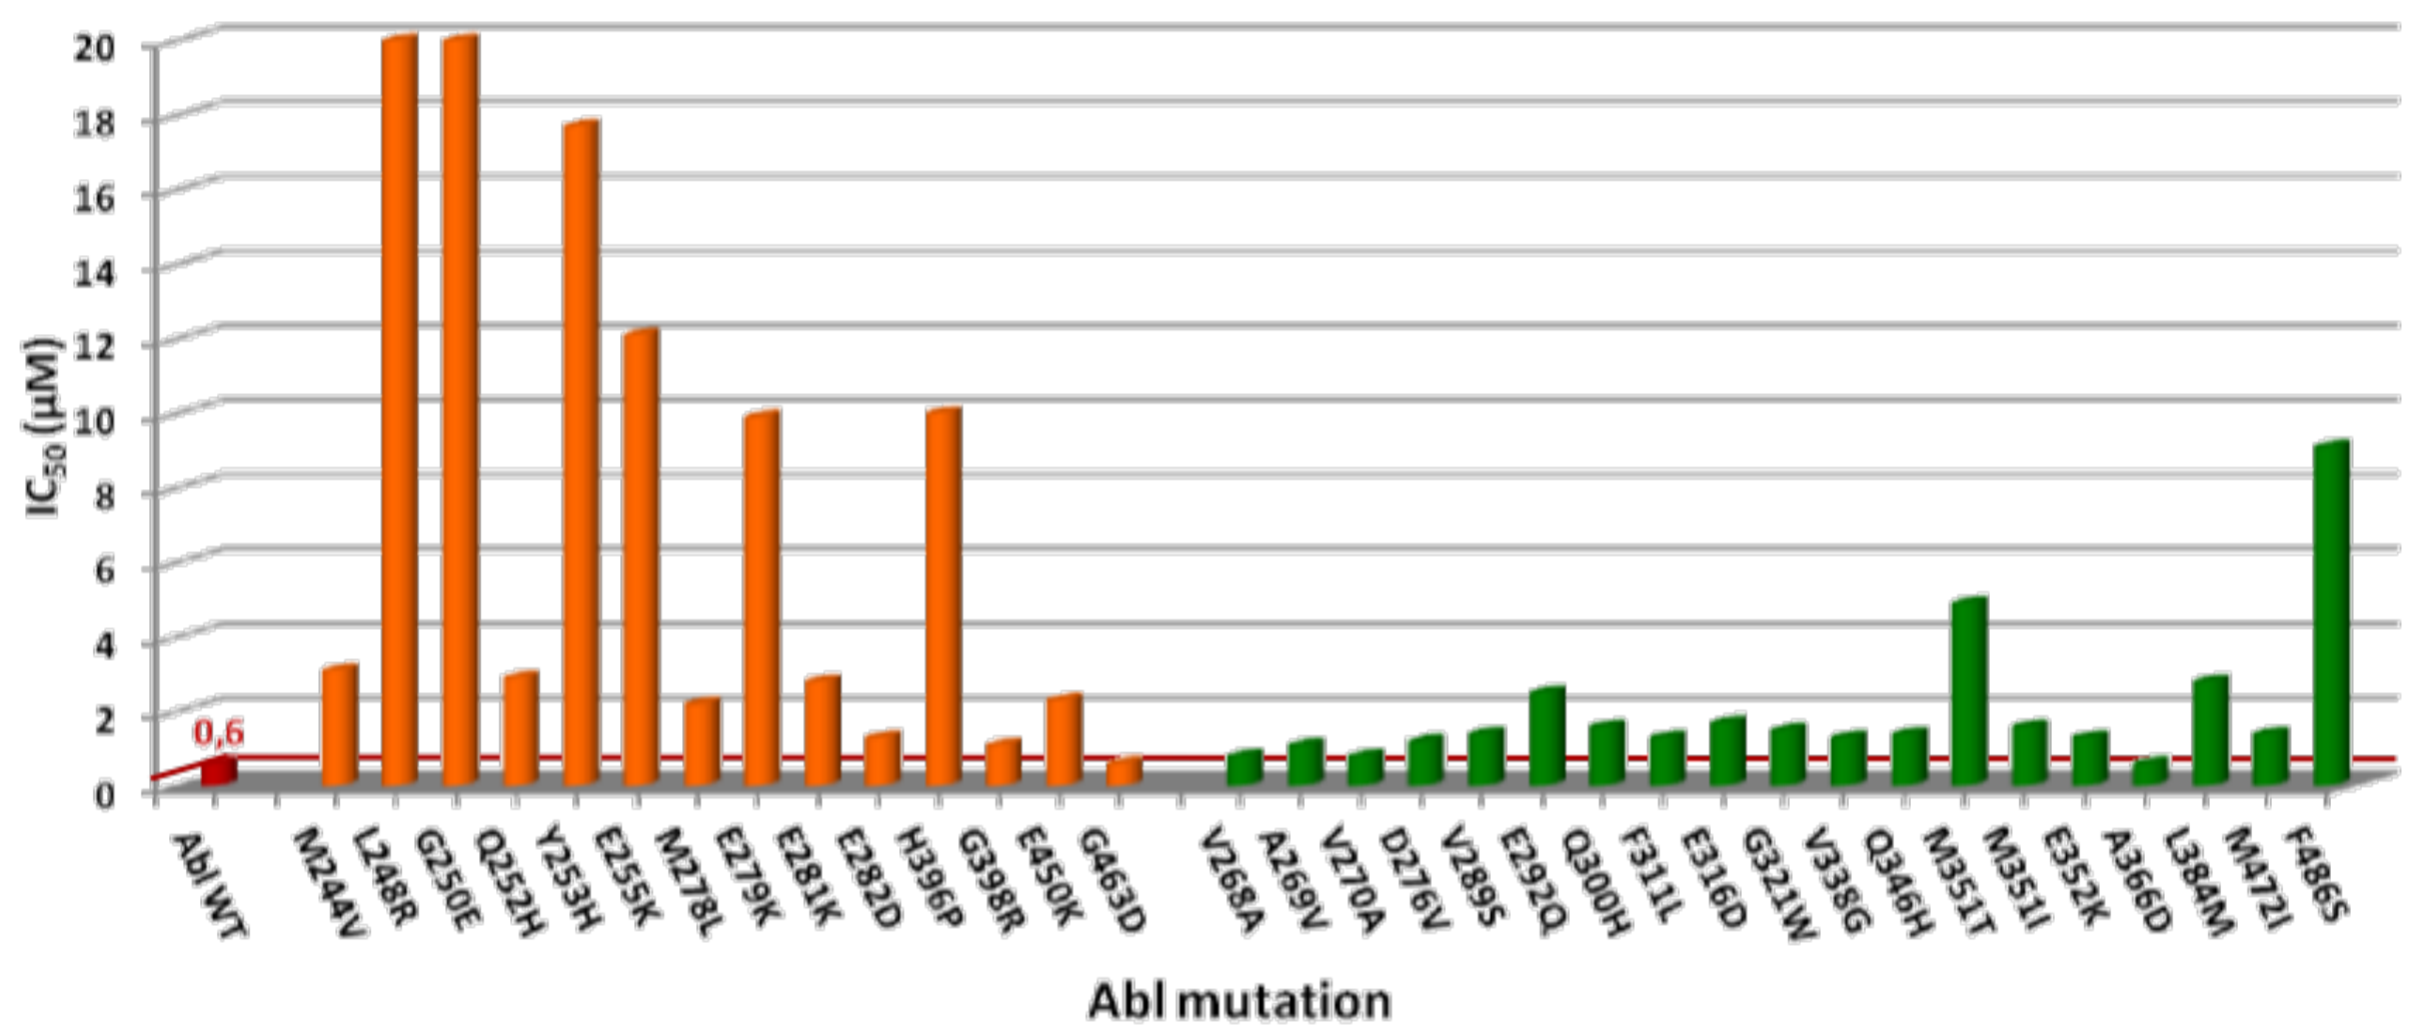

c

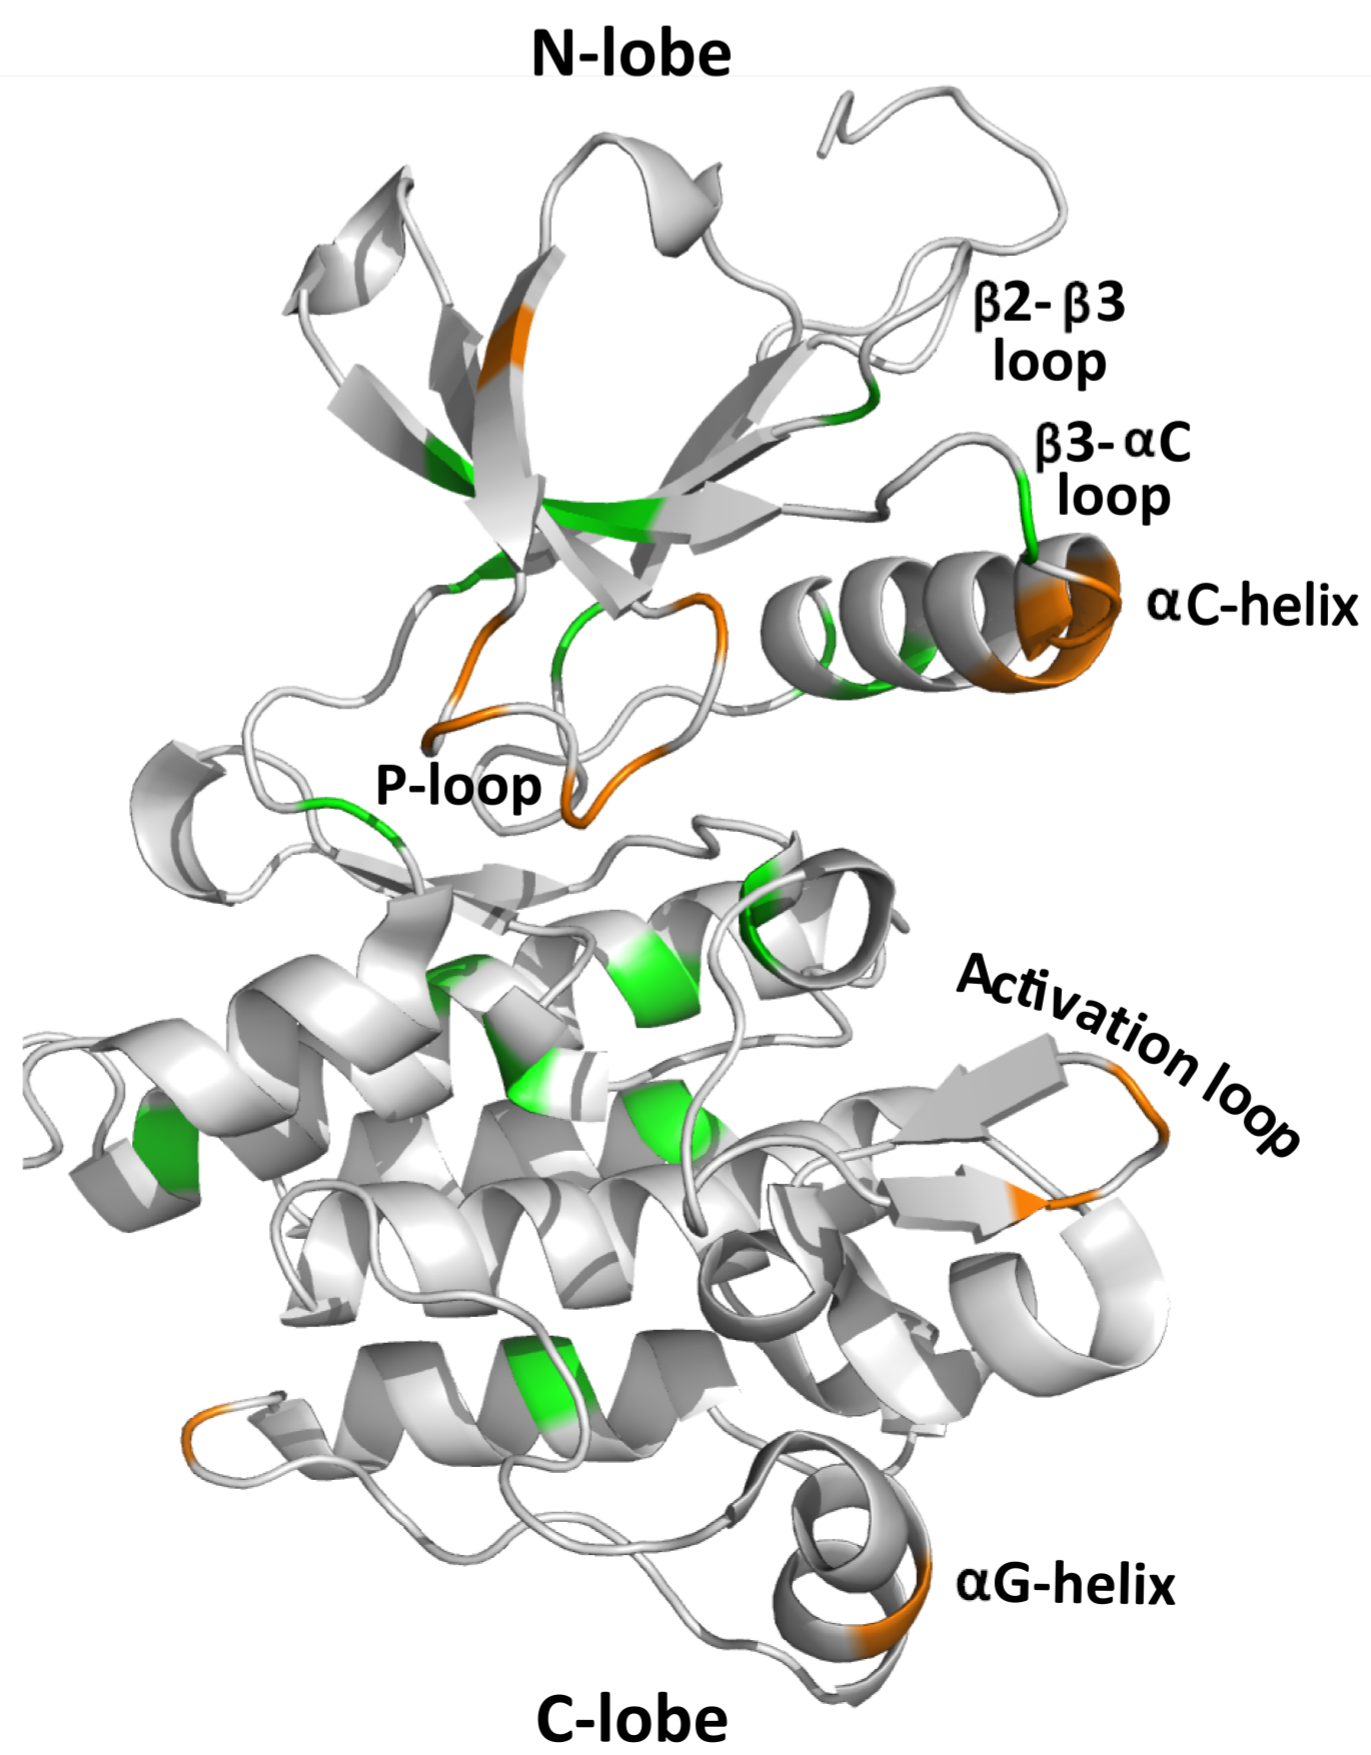

Supplement: Supplementary file 1 [file 1 › S1_Fig.pdf]

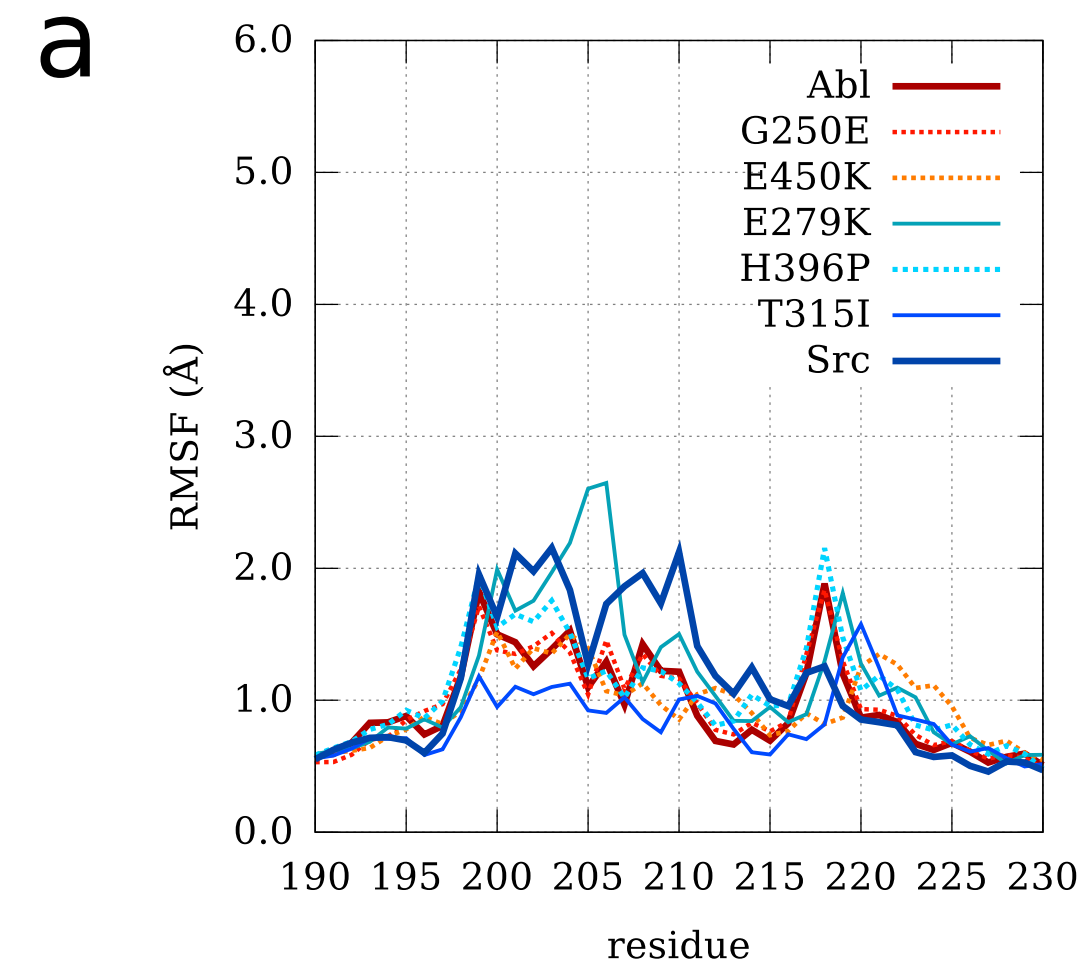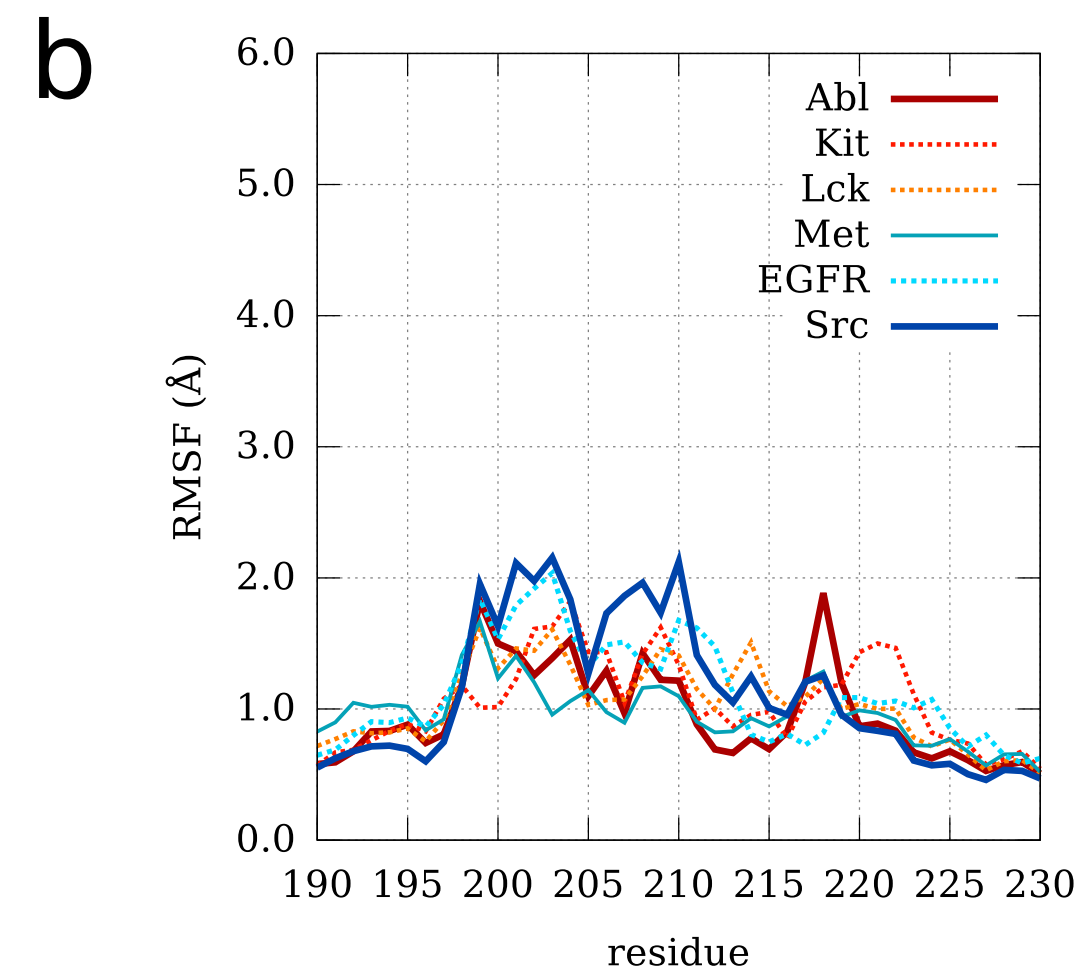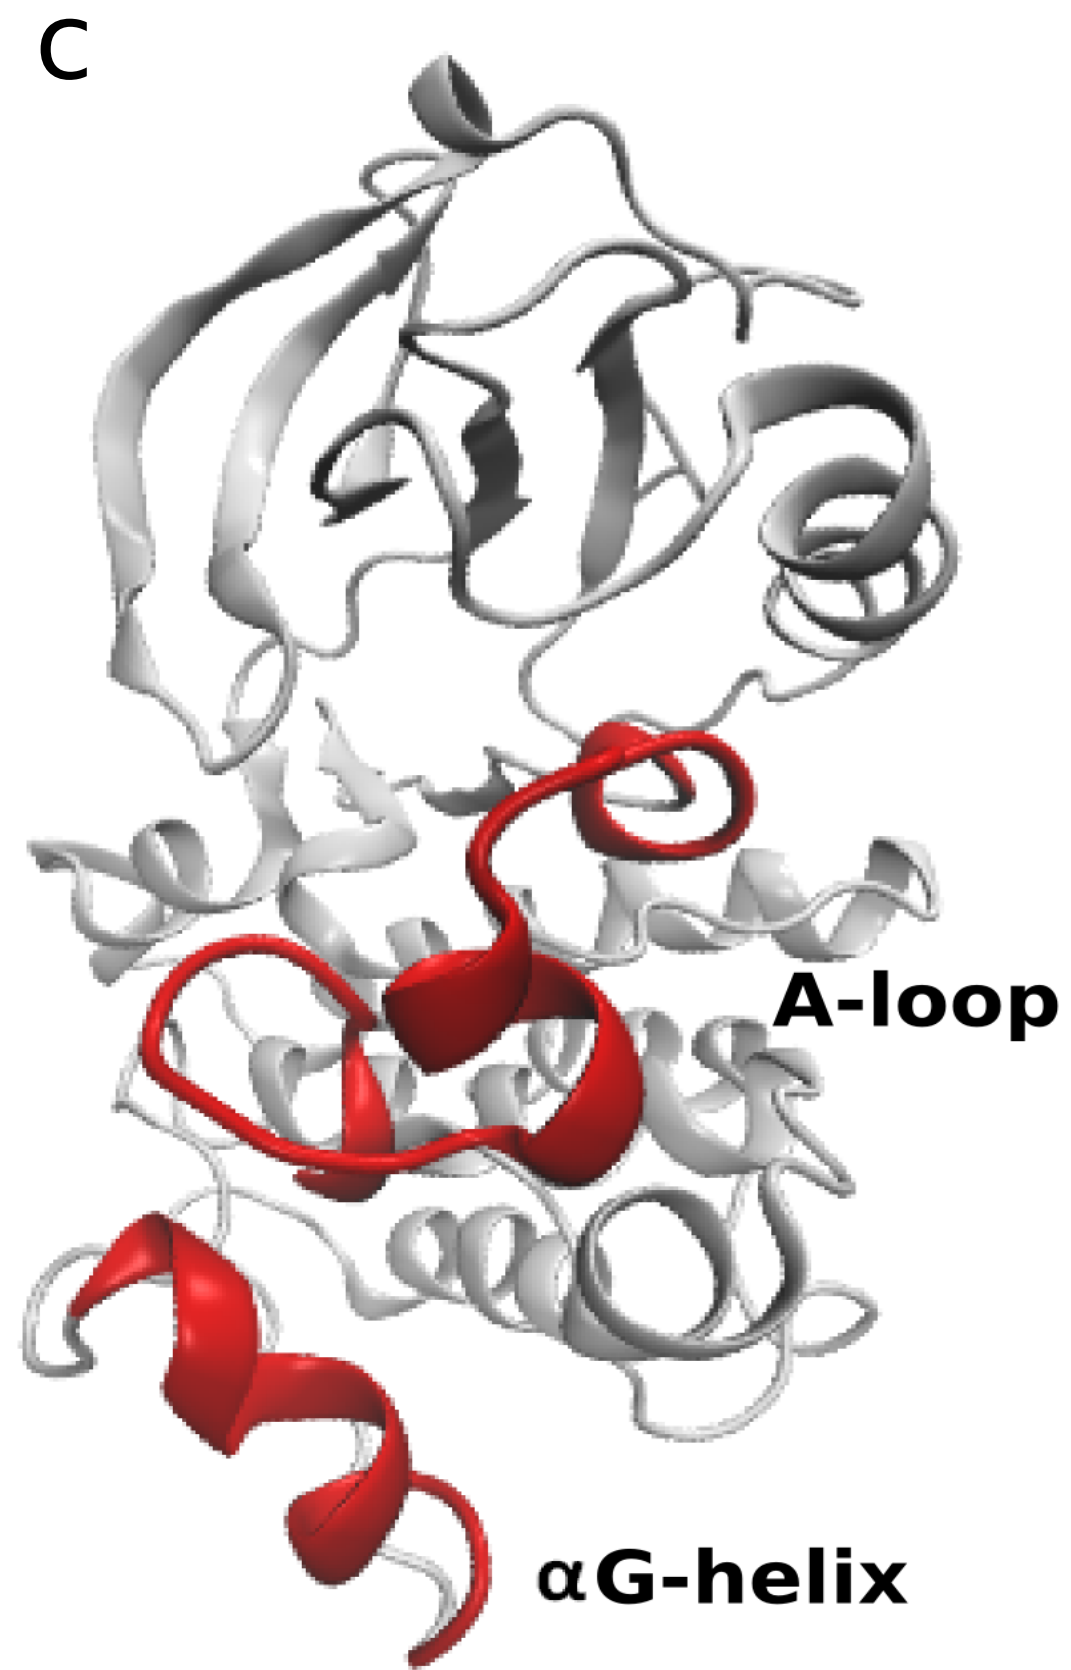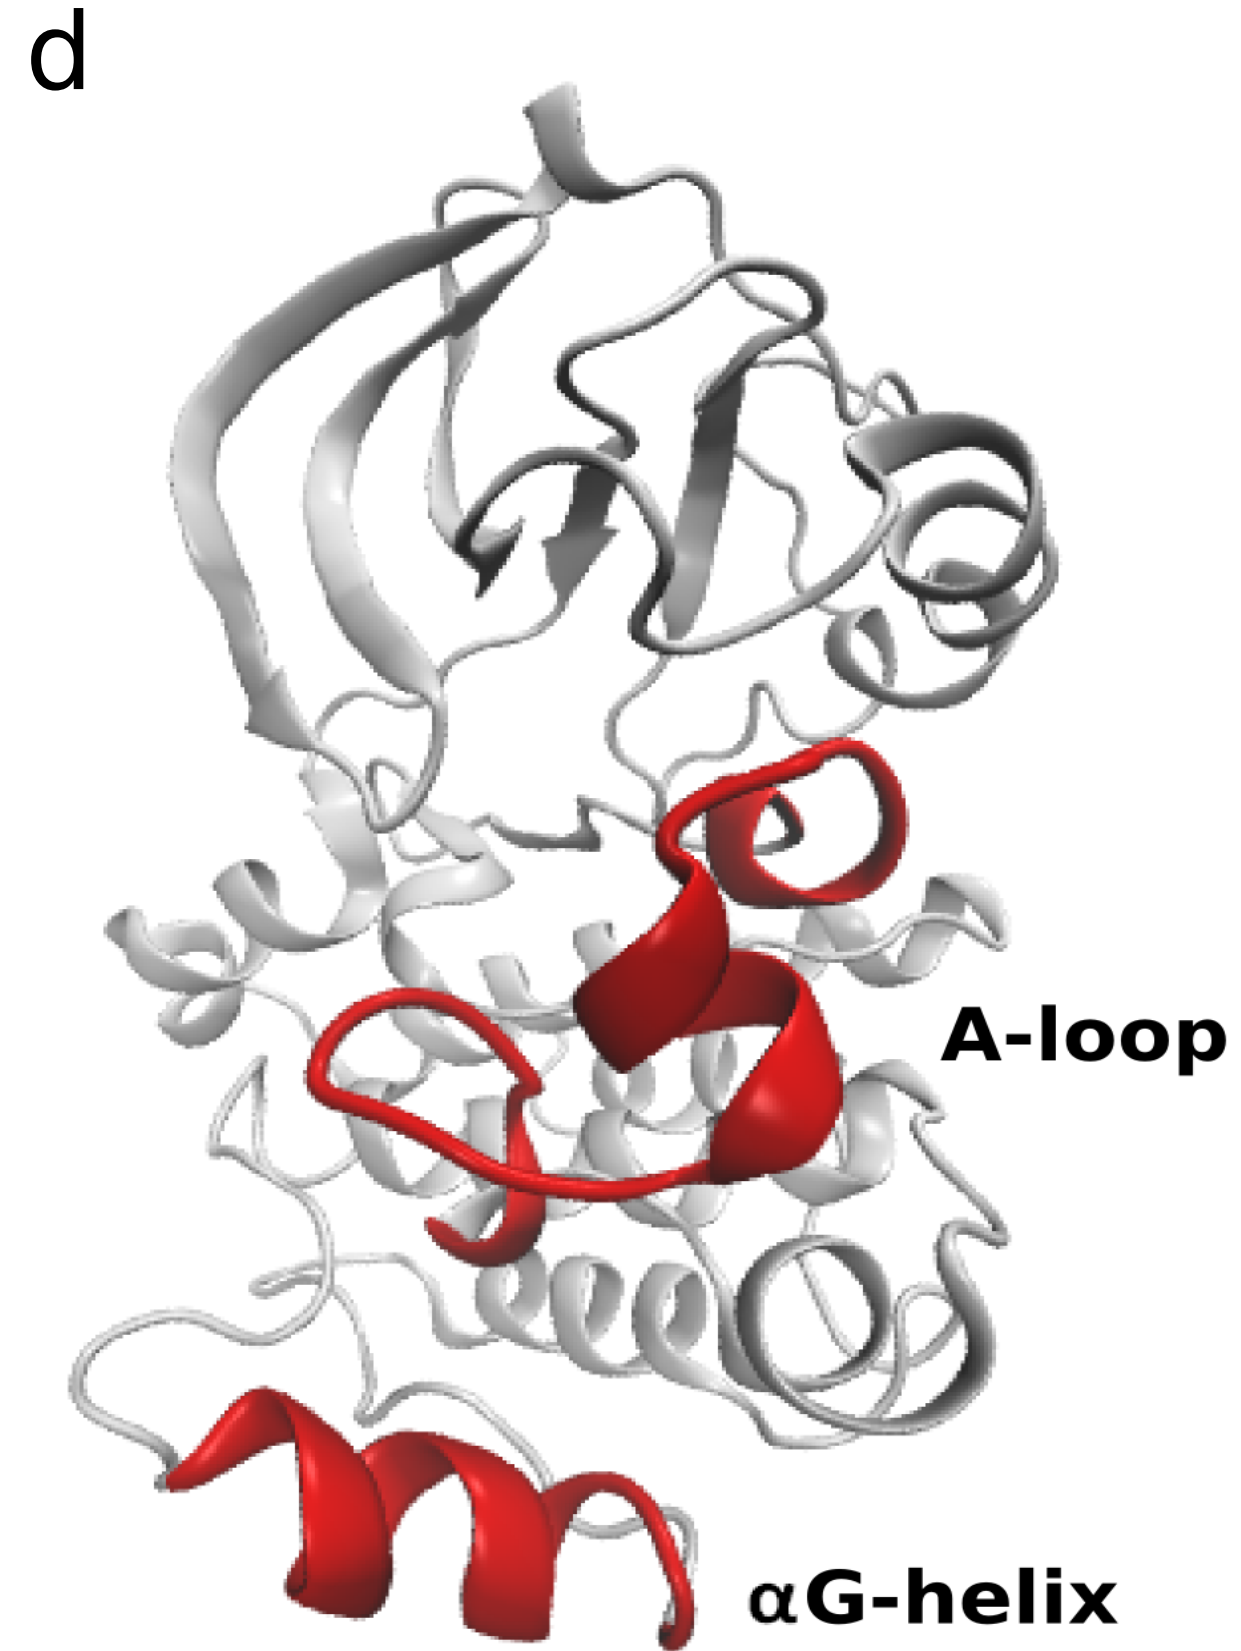

Supplement: Supplementary file 1 [file 1 › S2_Fig.pdf]

a

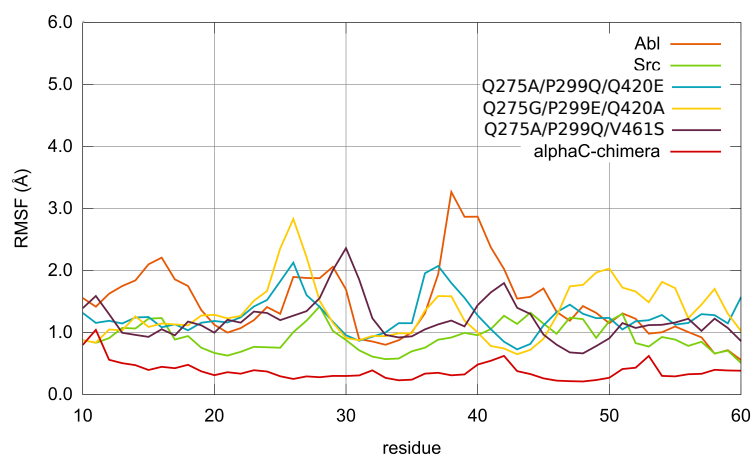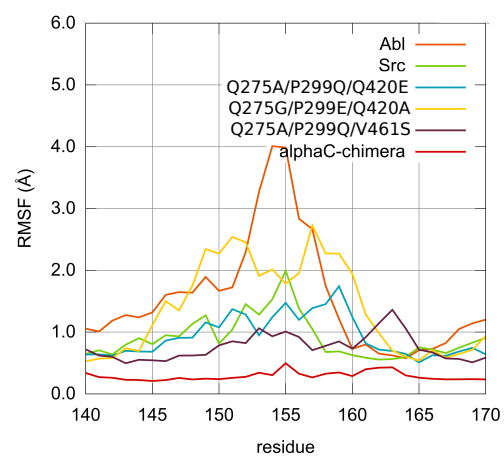

b

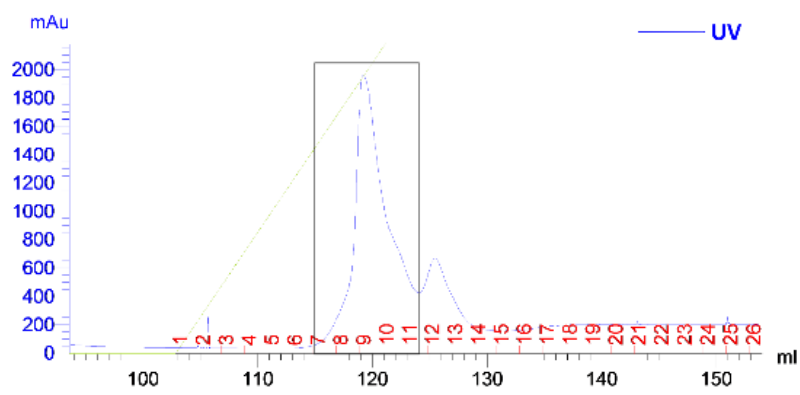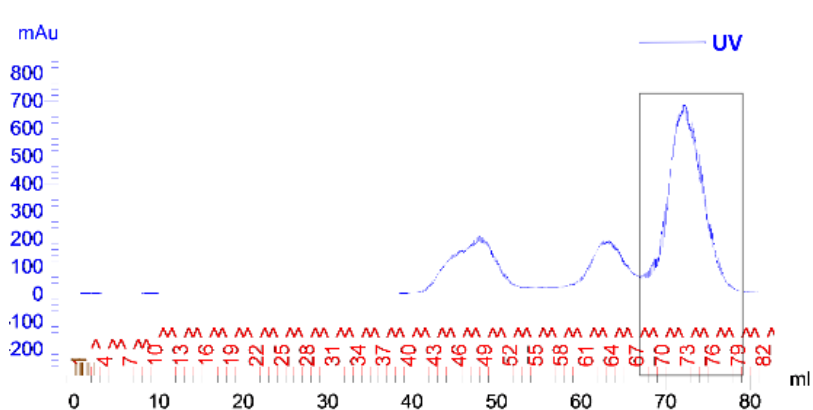

c

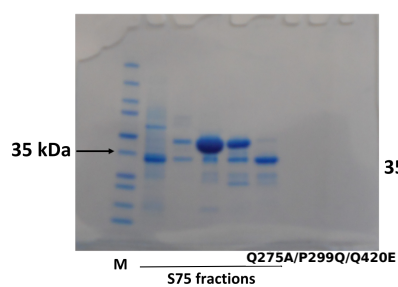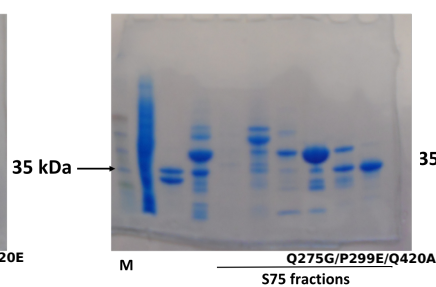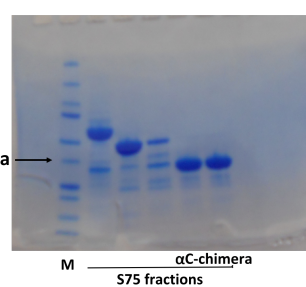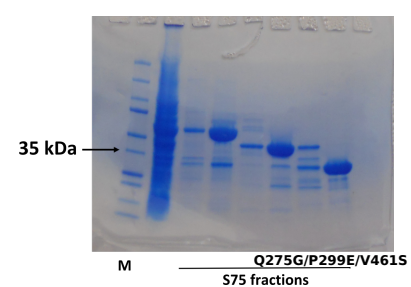

d

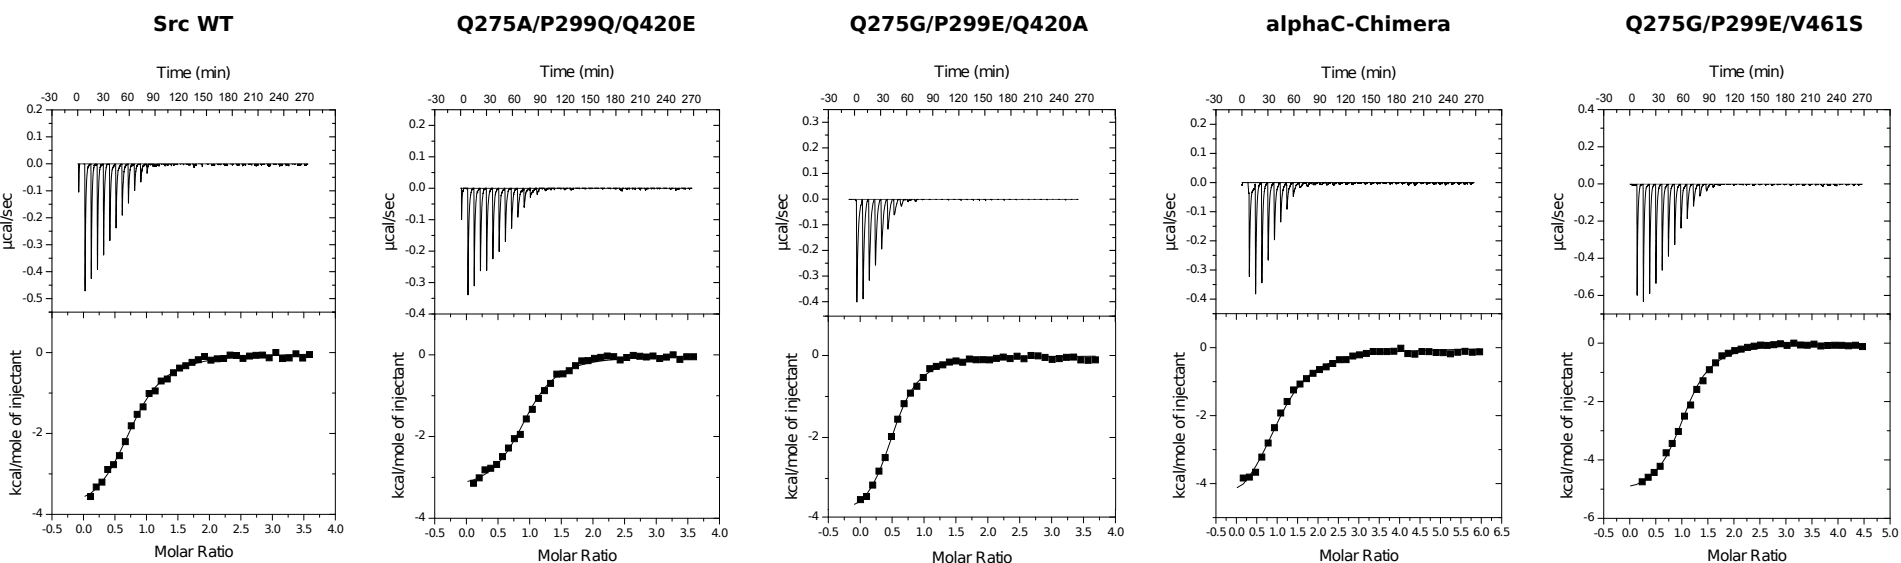

Supplement: Supplementary file 1 [file 1 › S3_Fig.pdf]

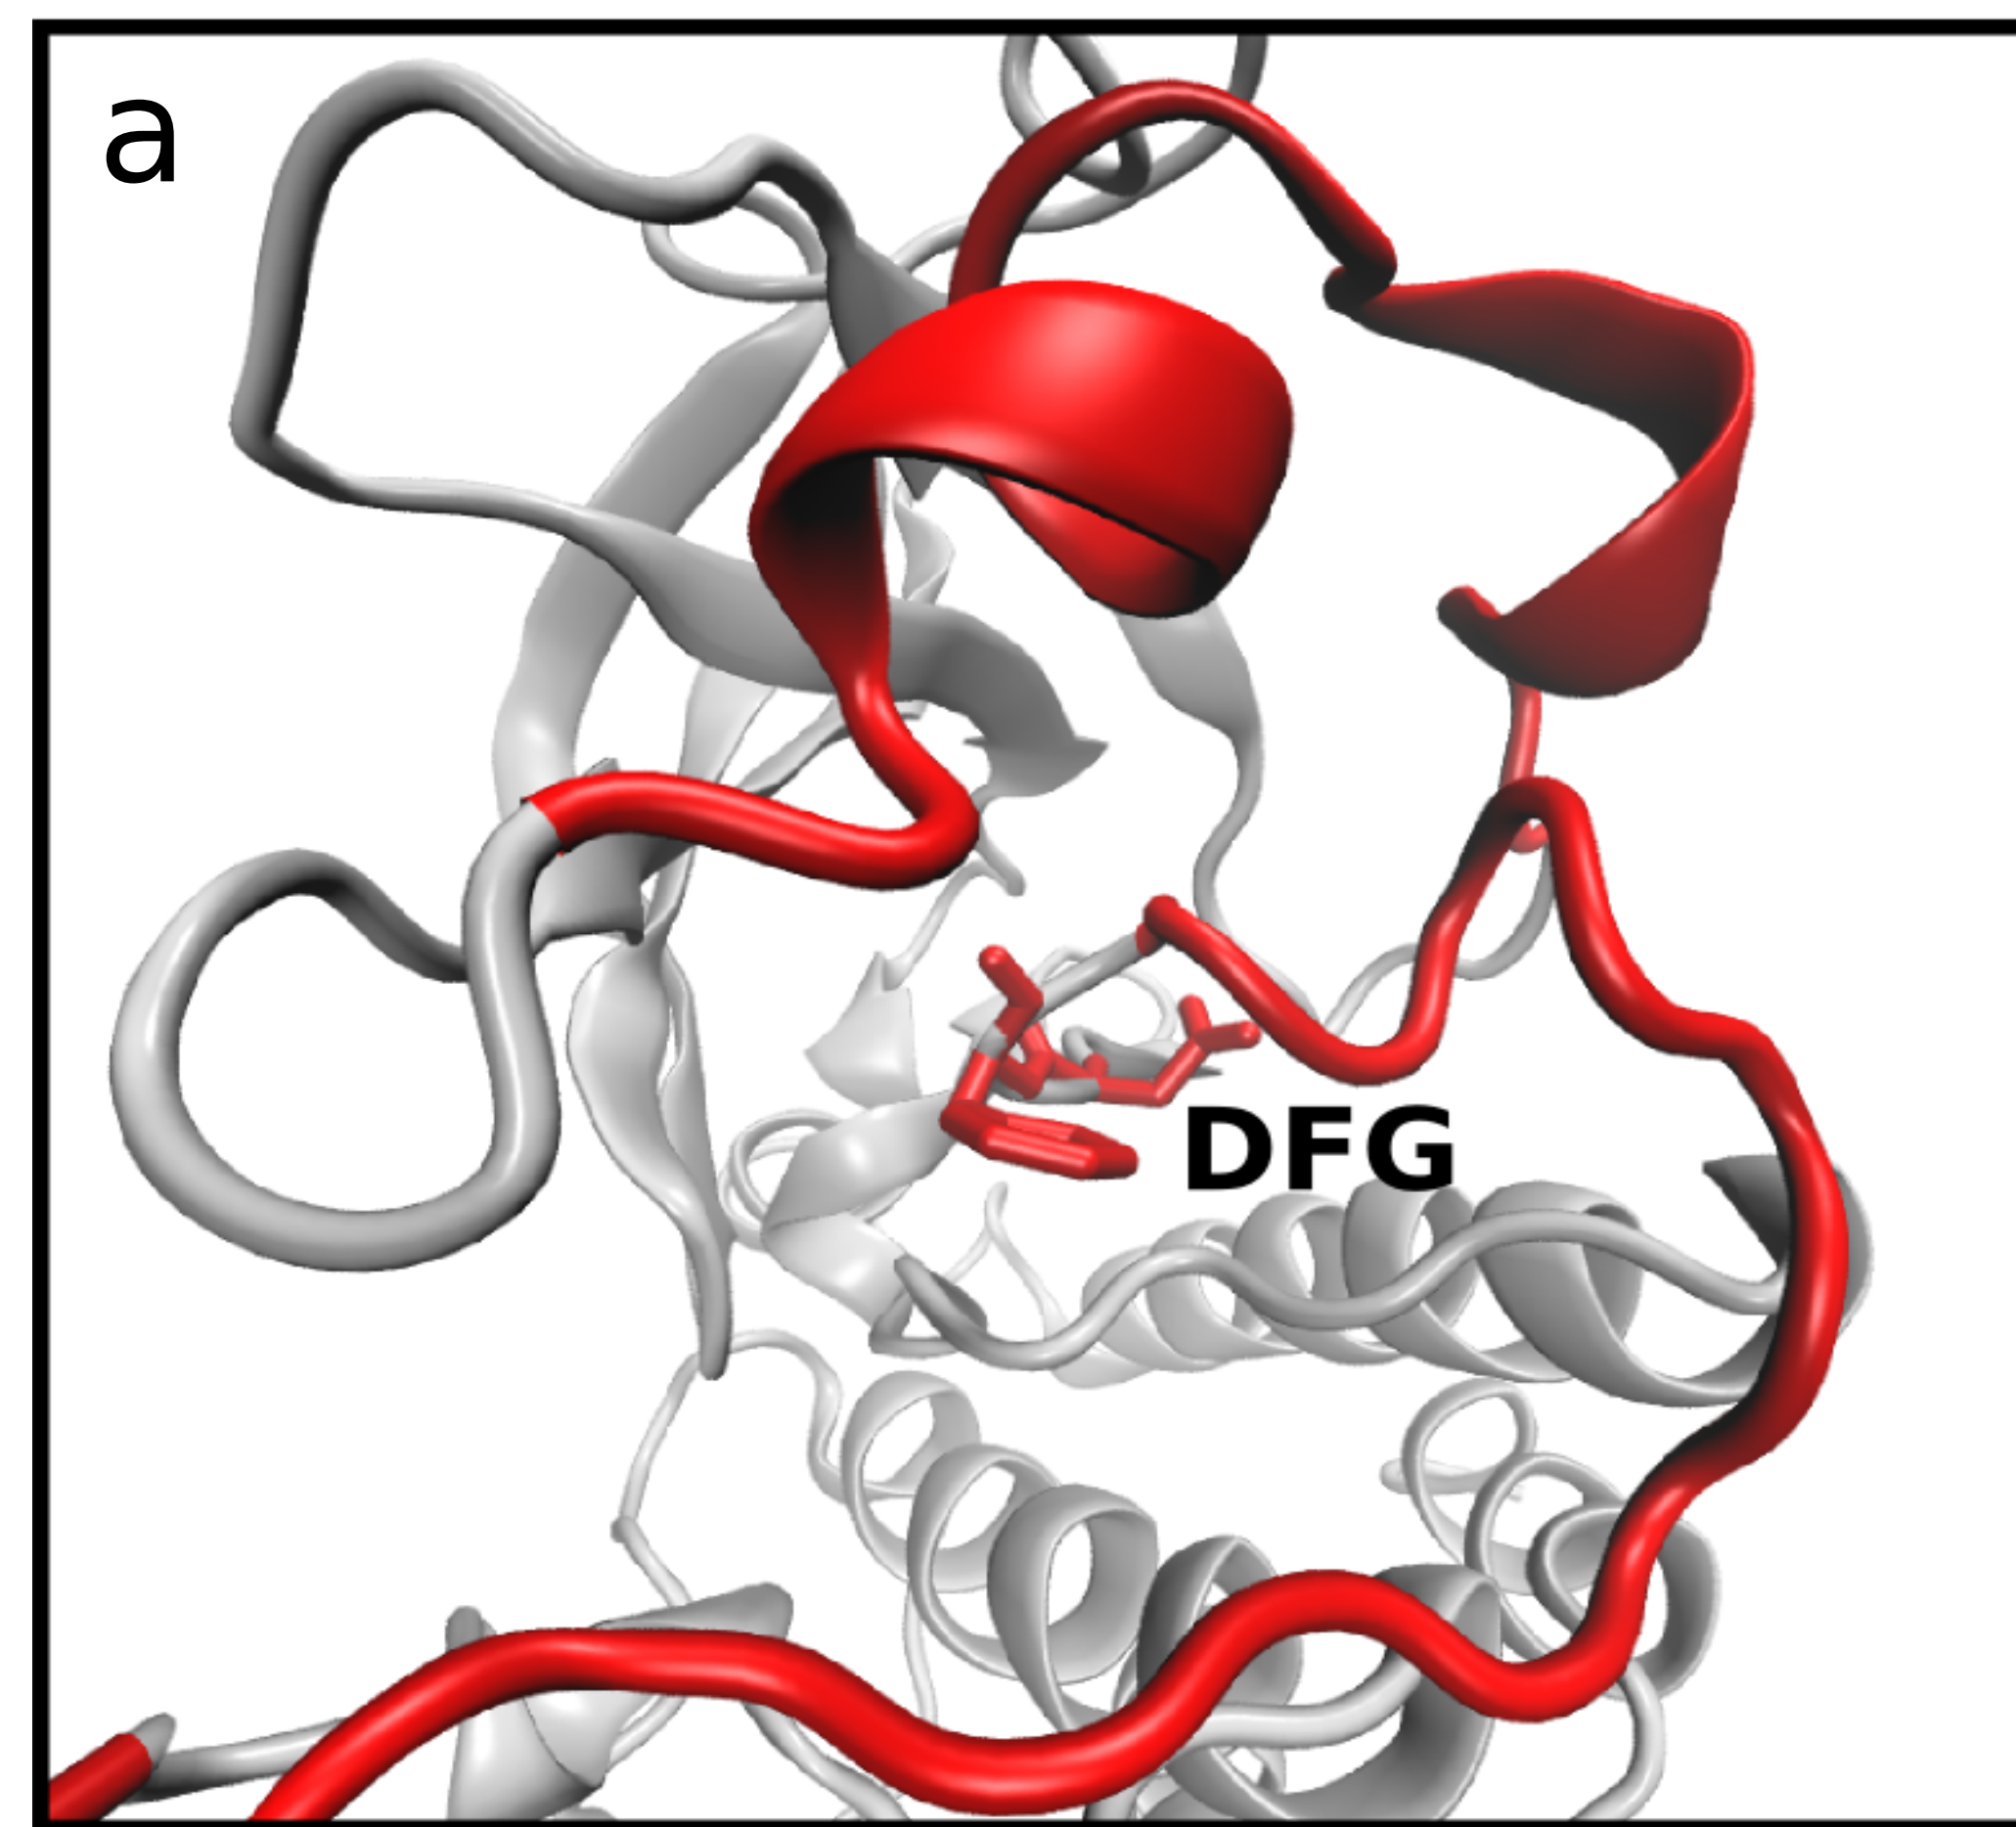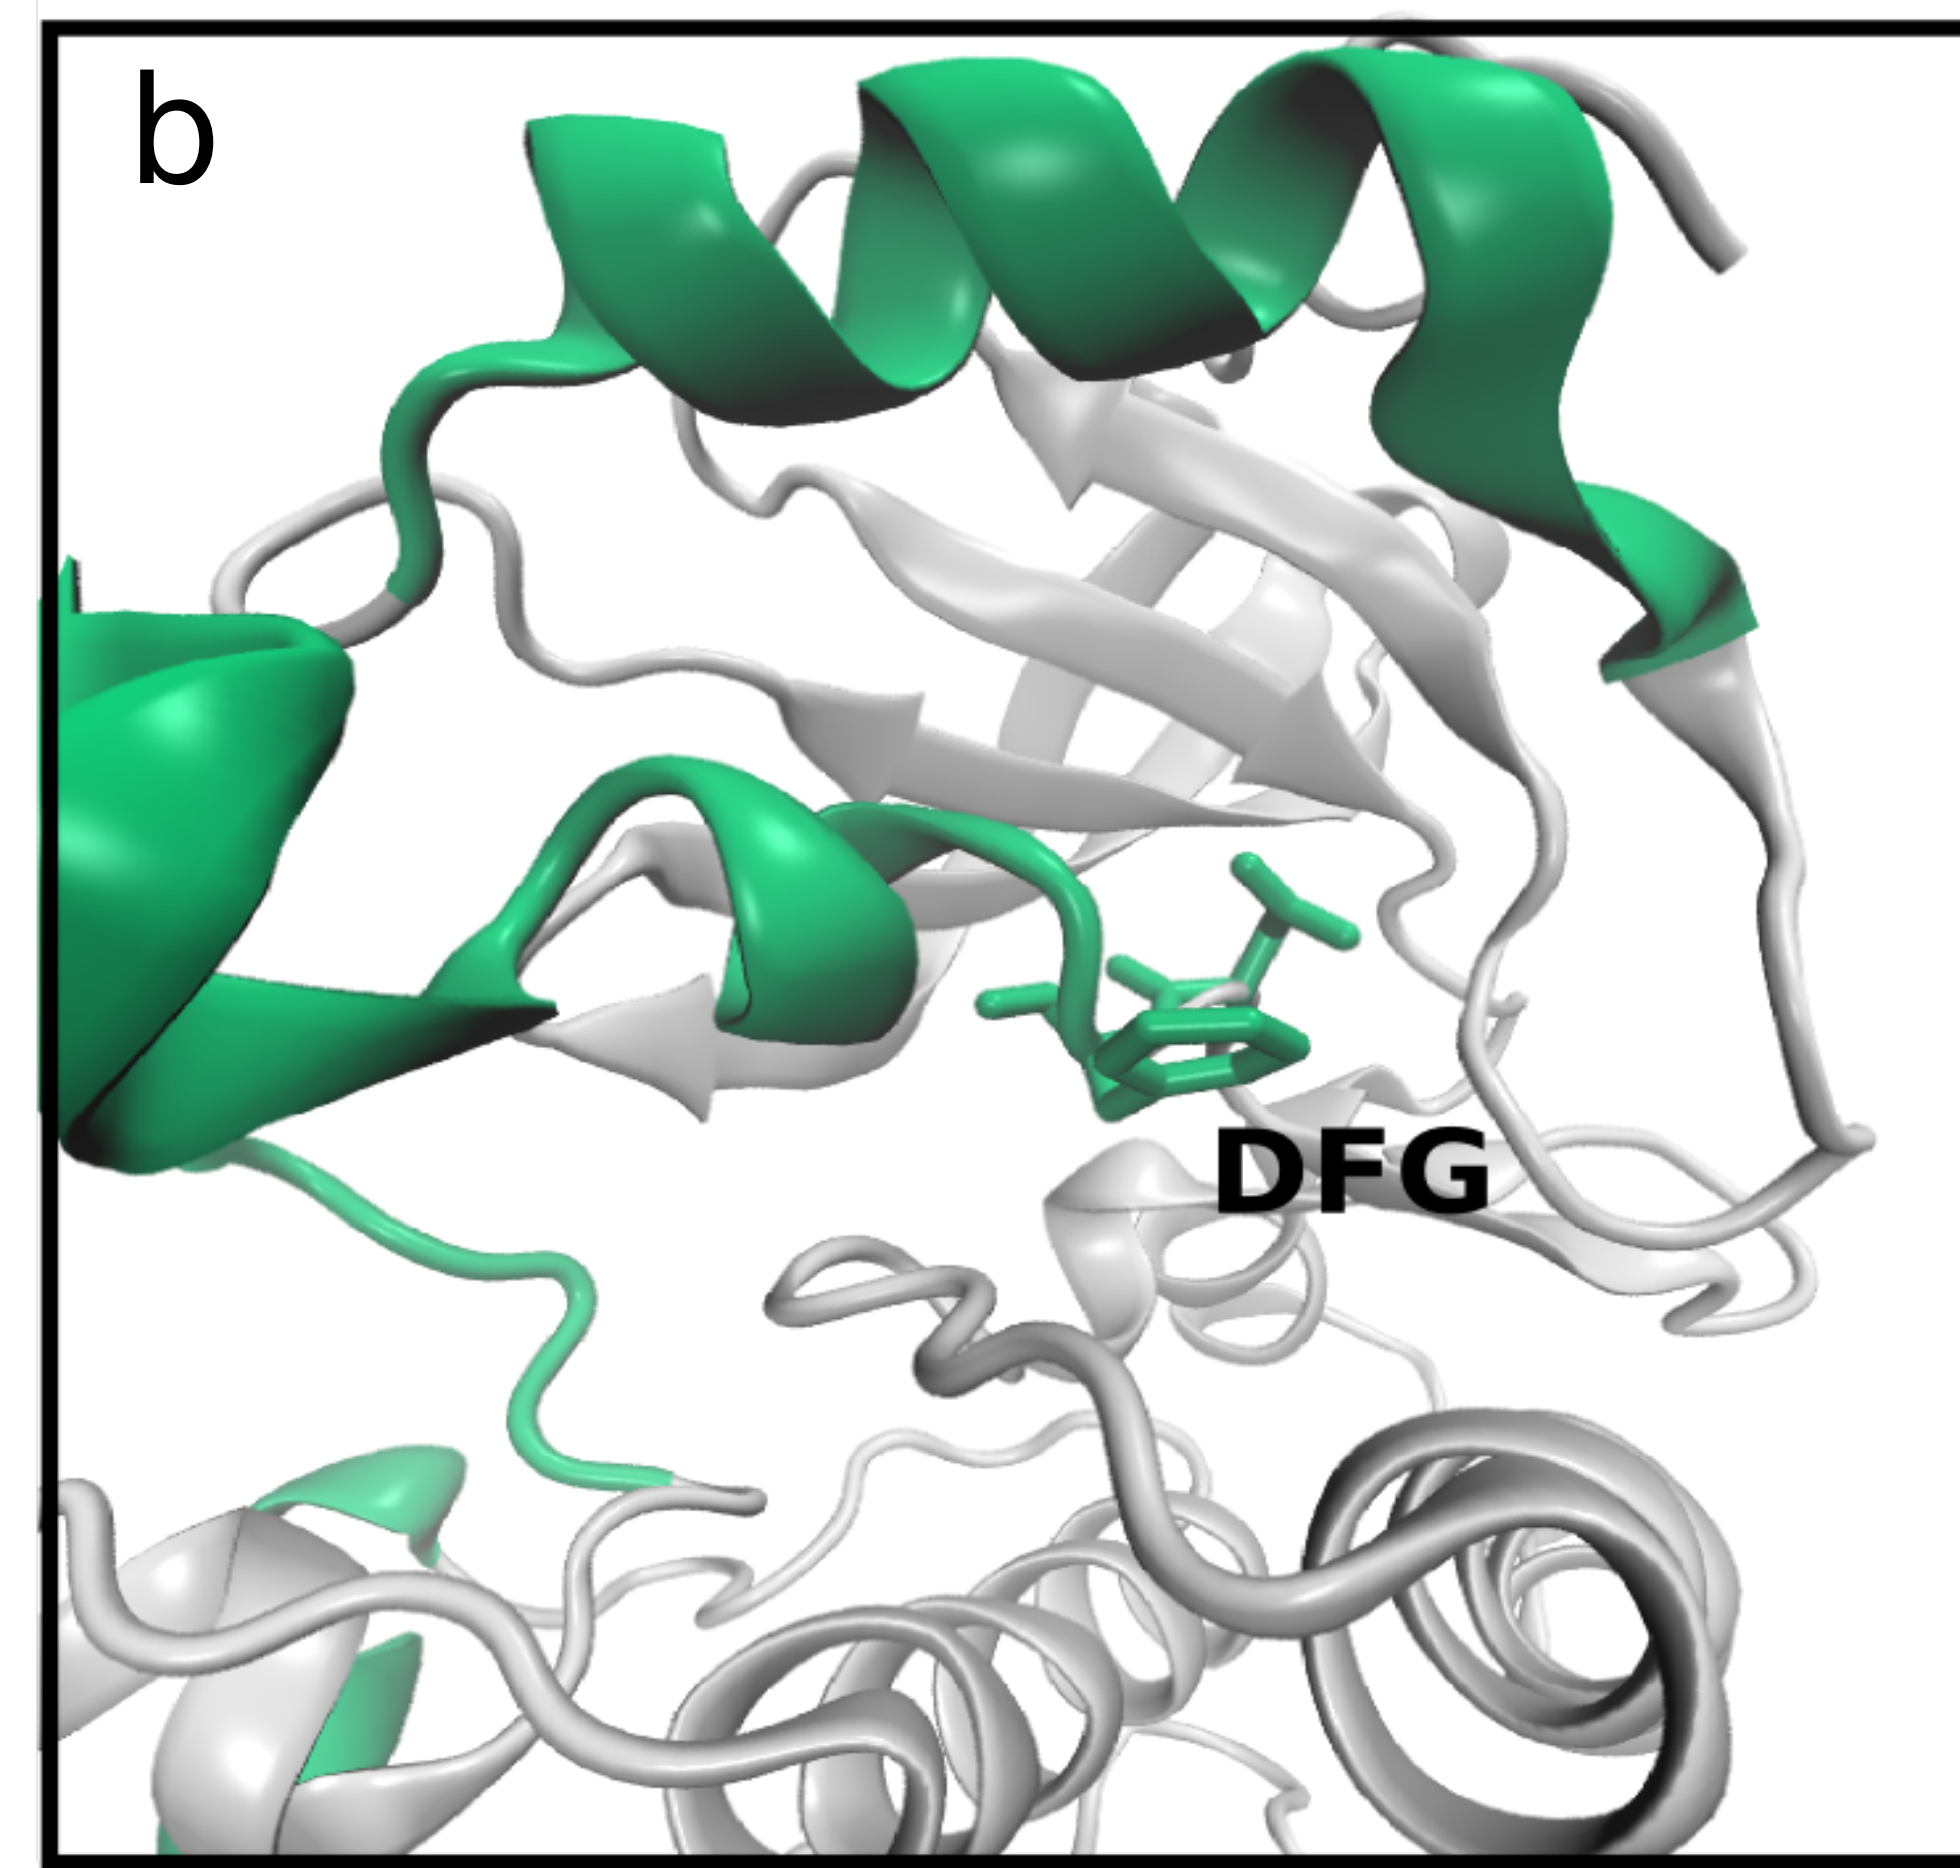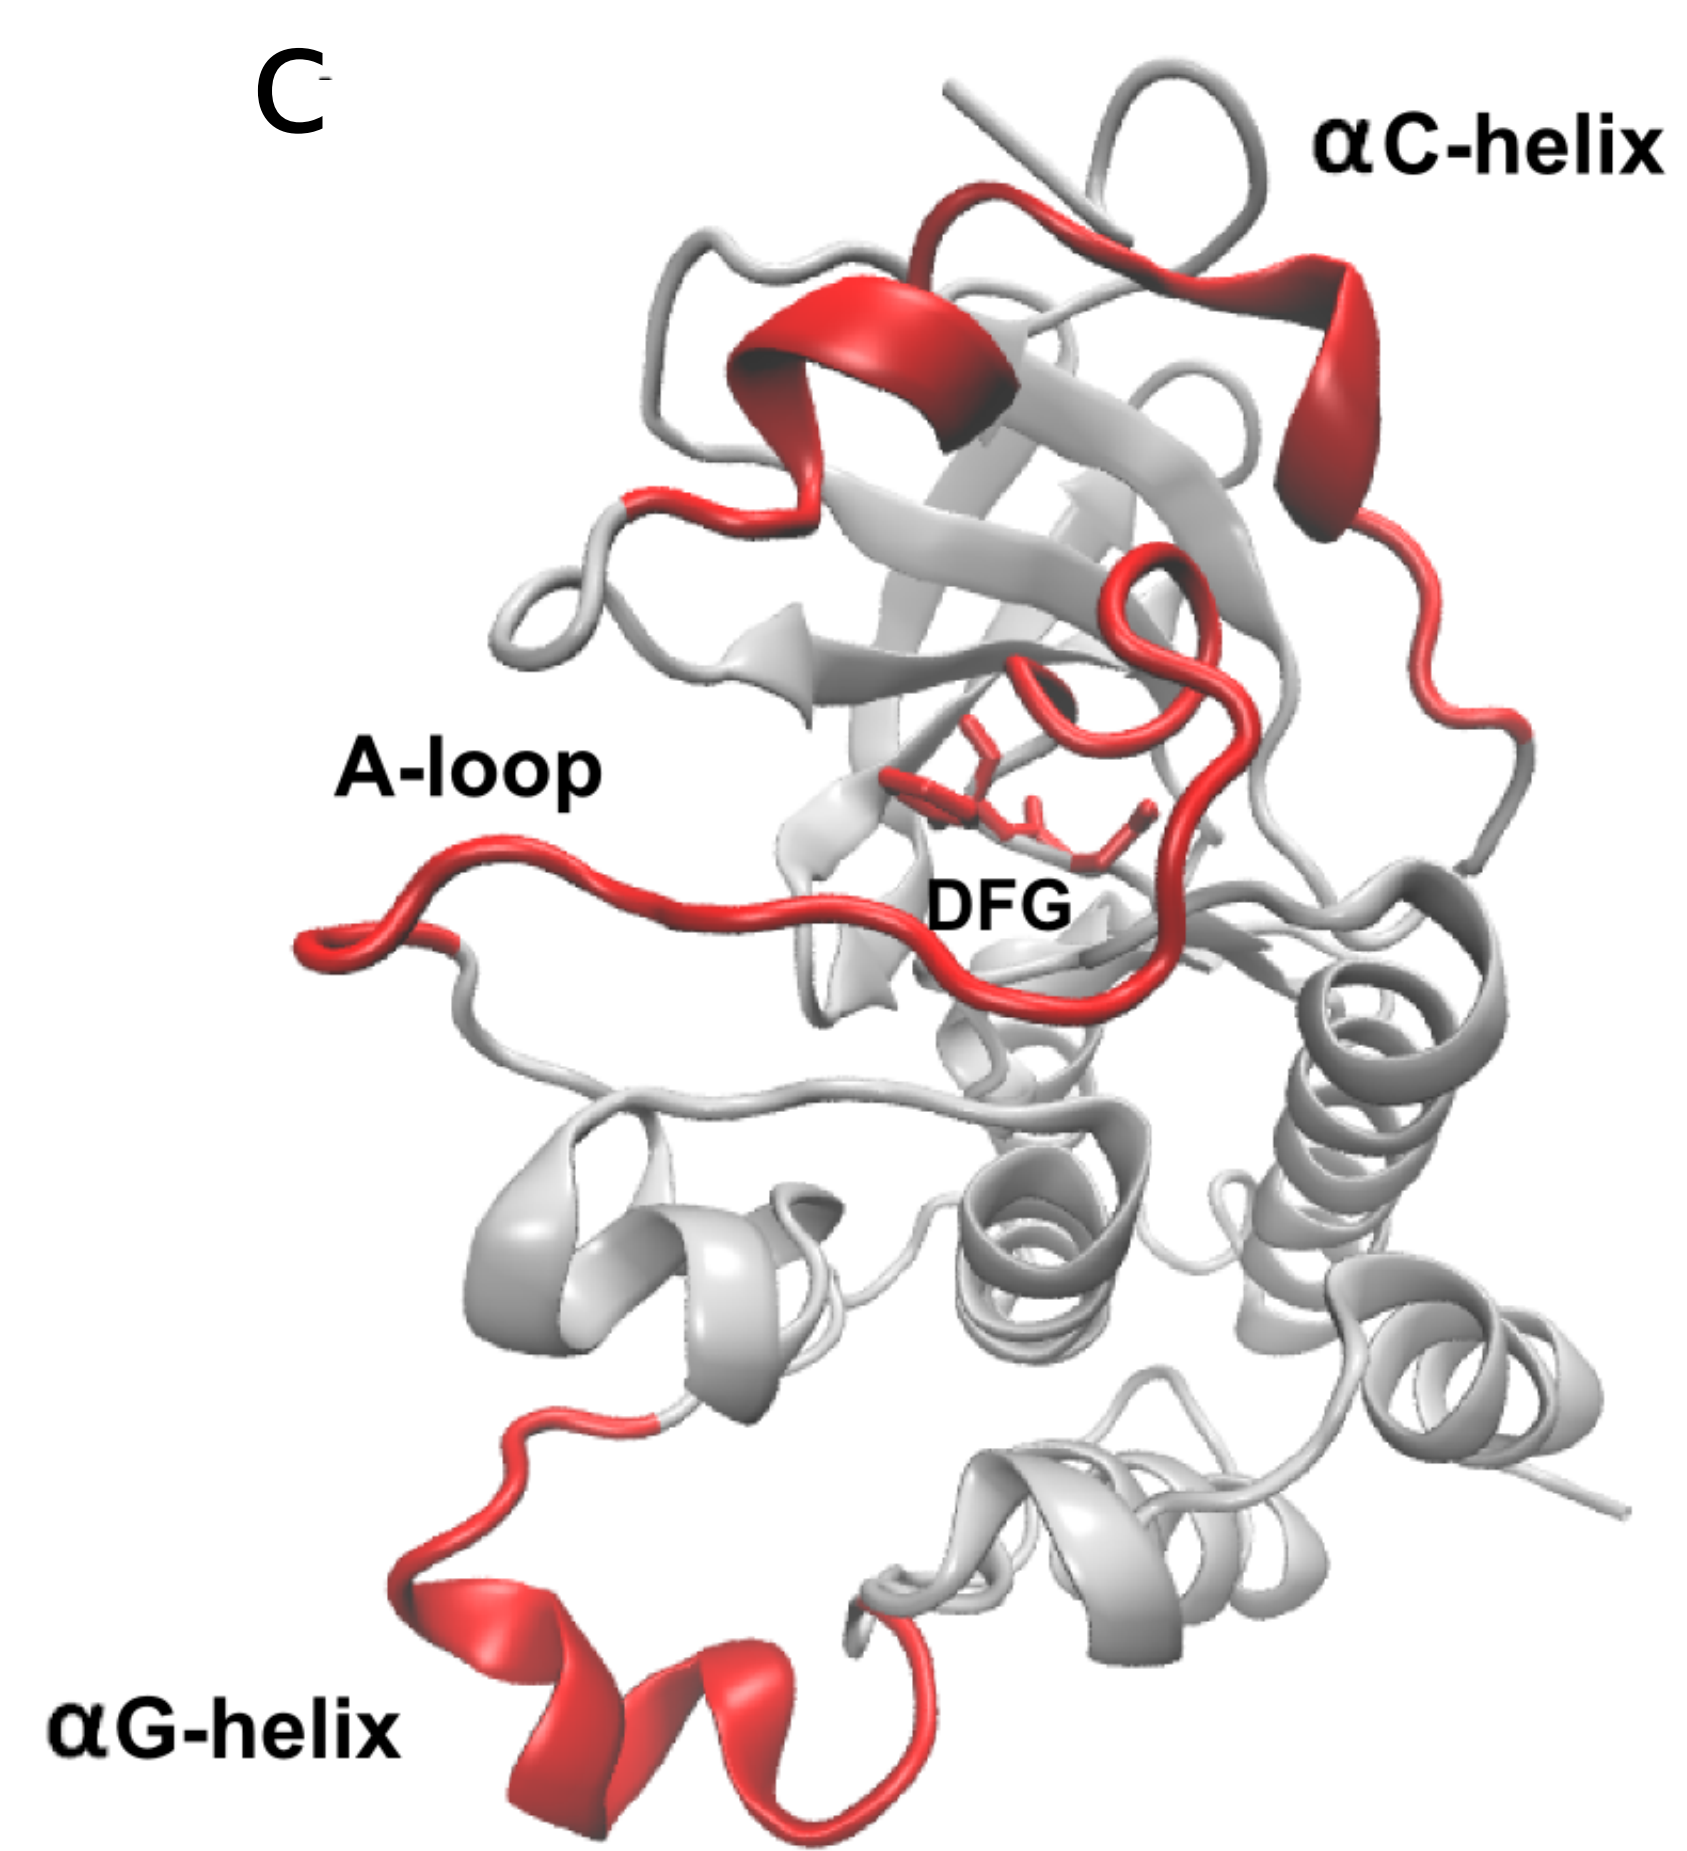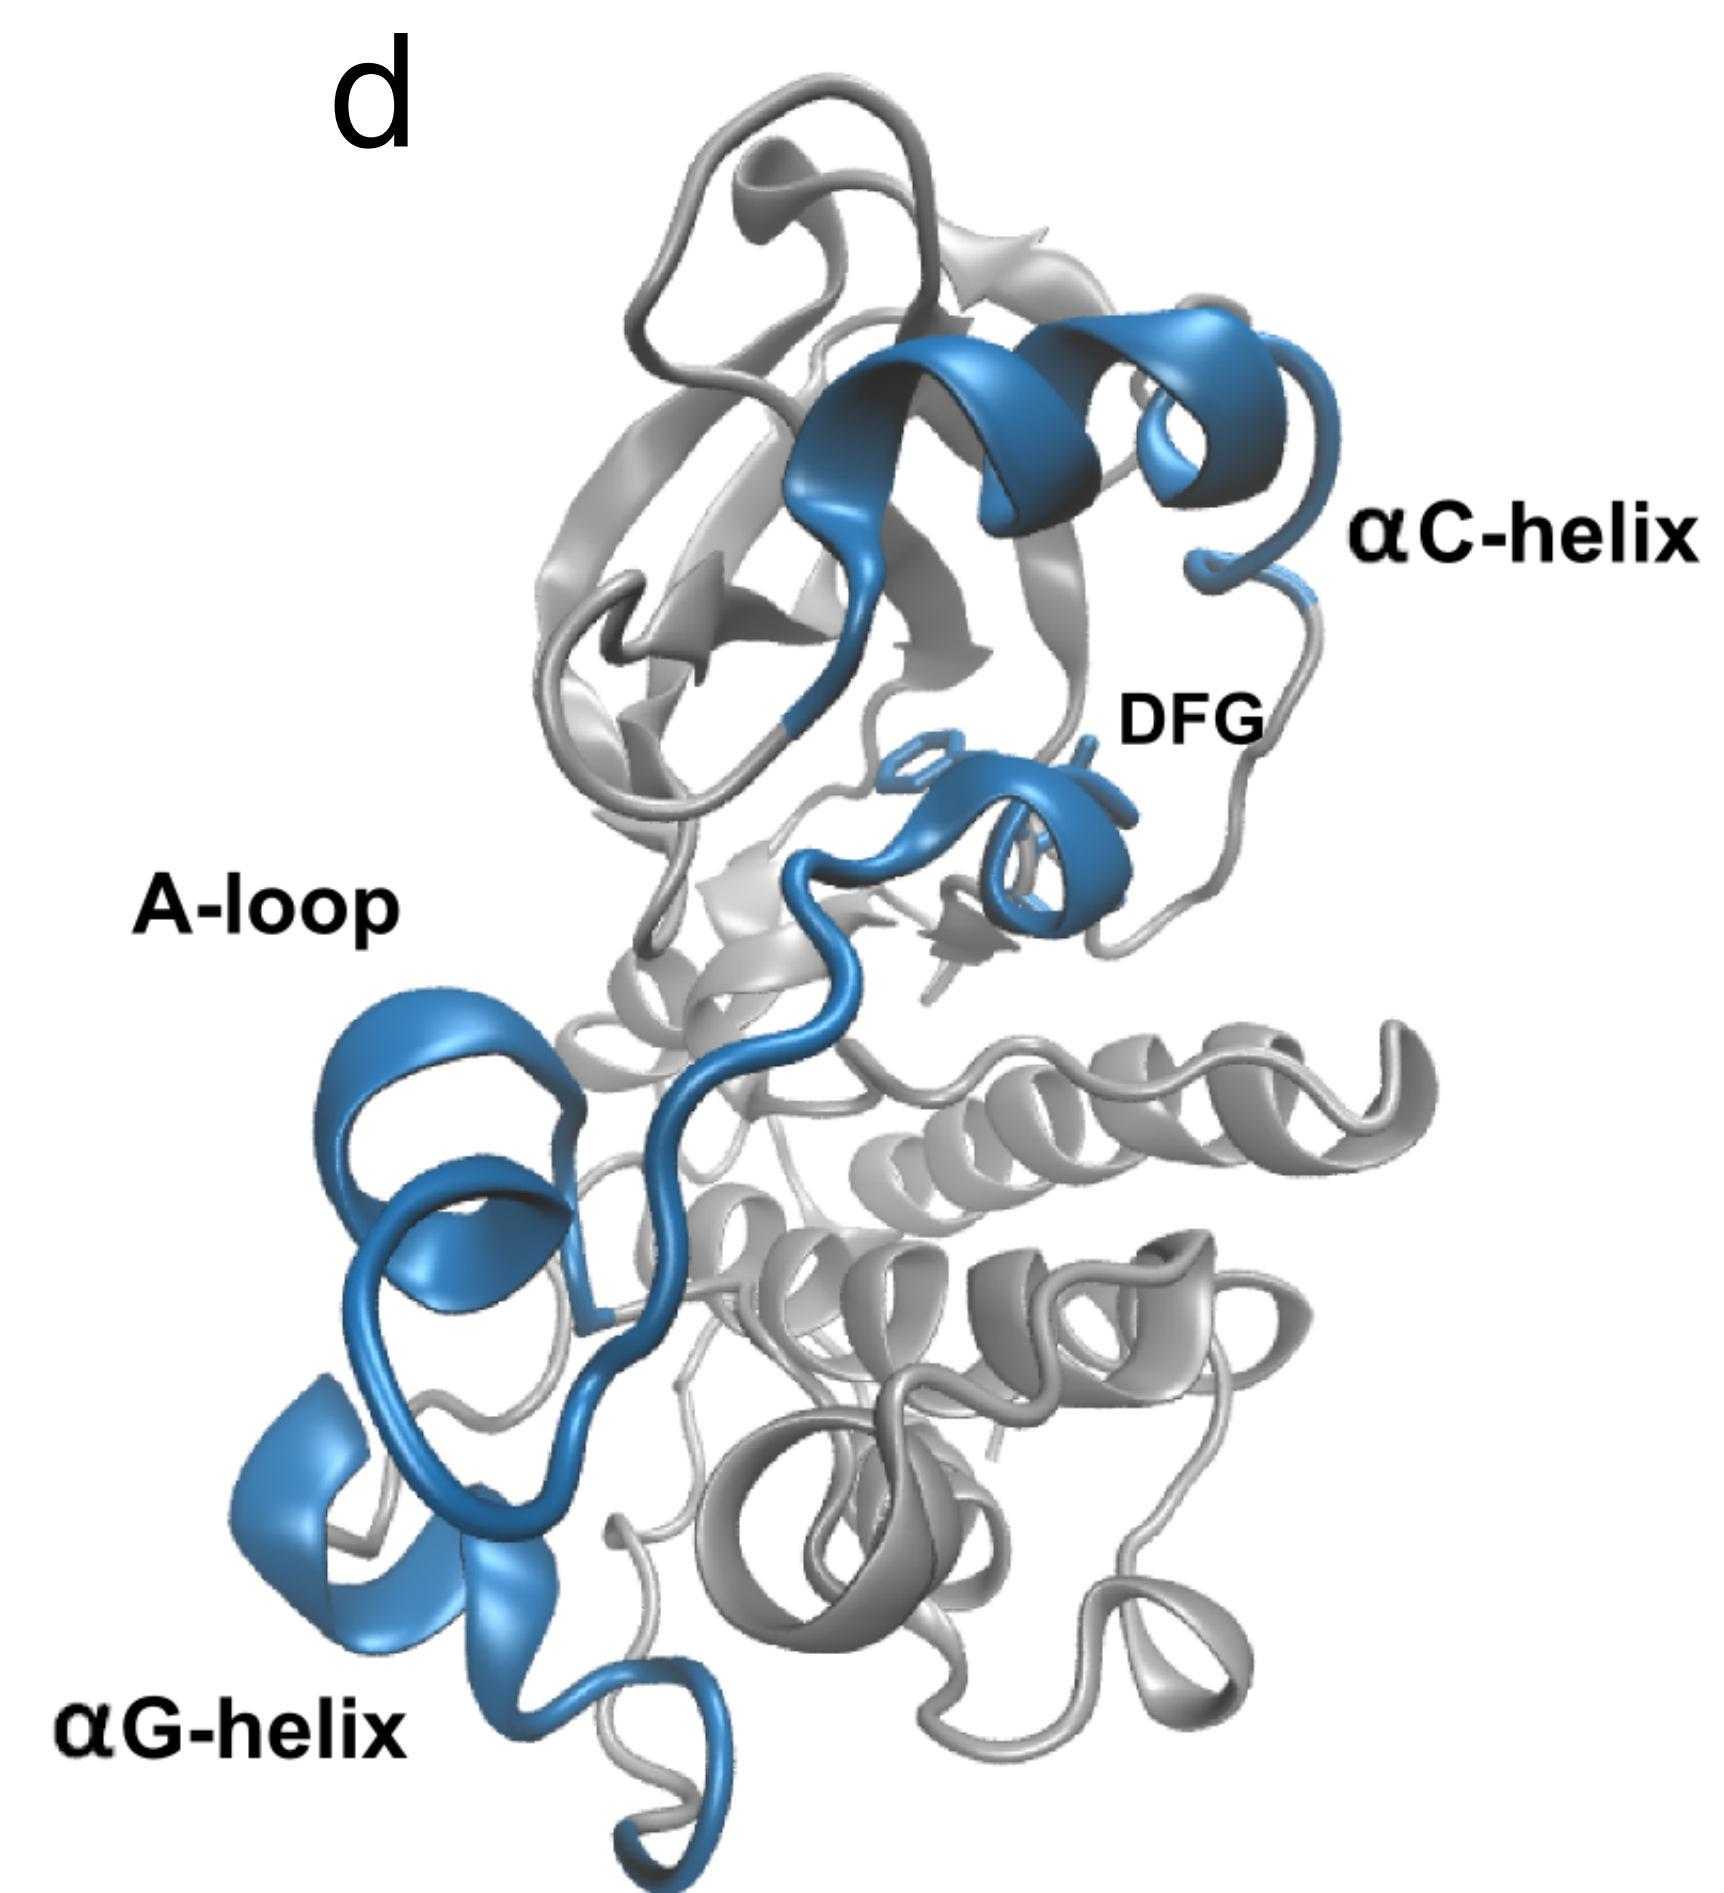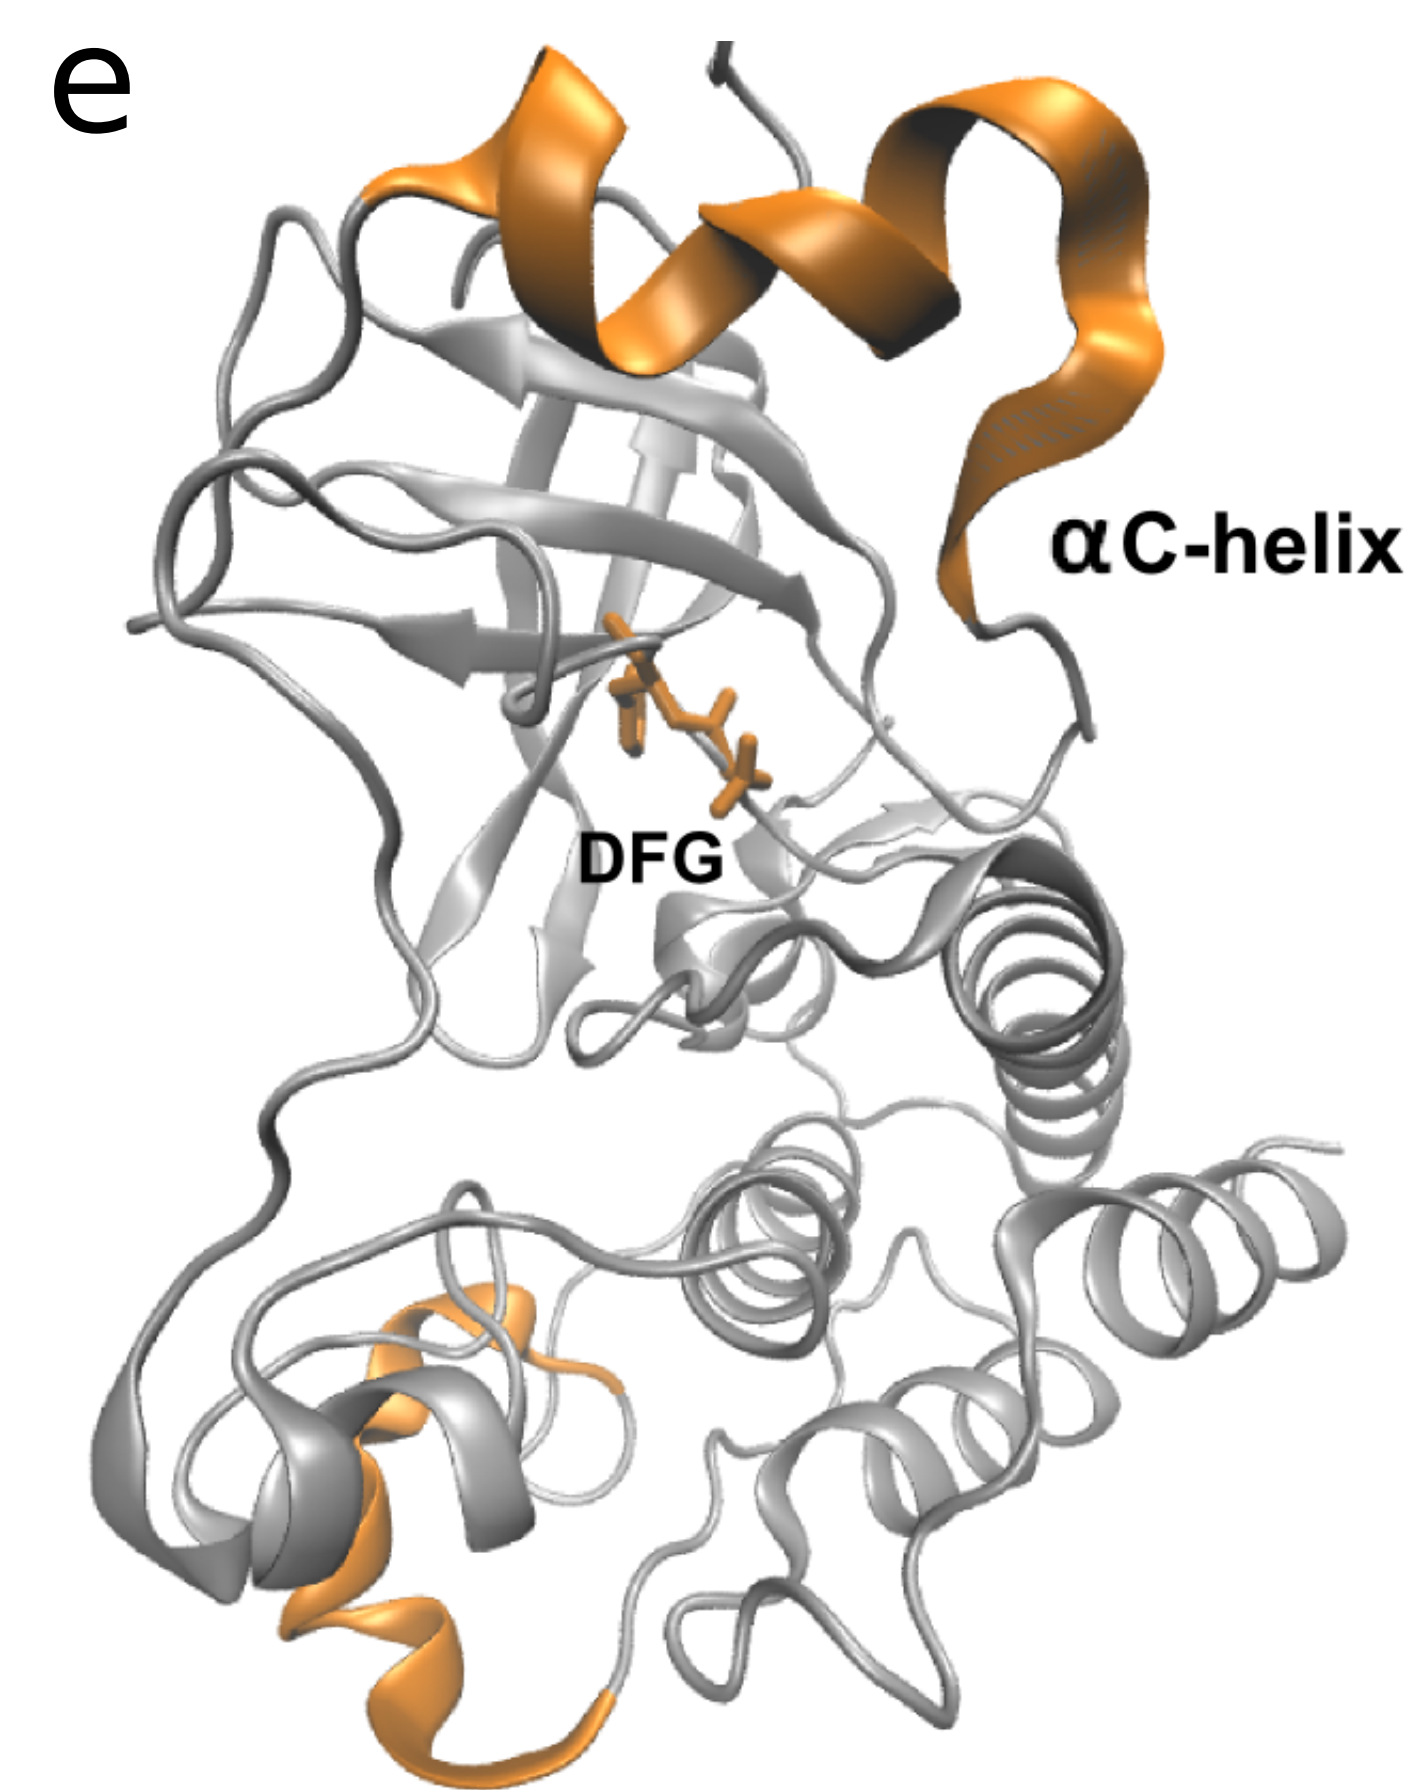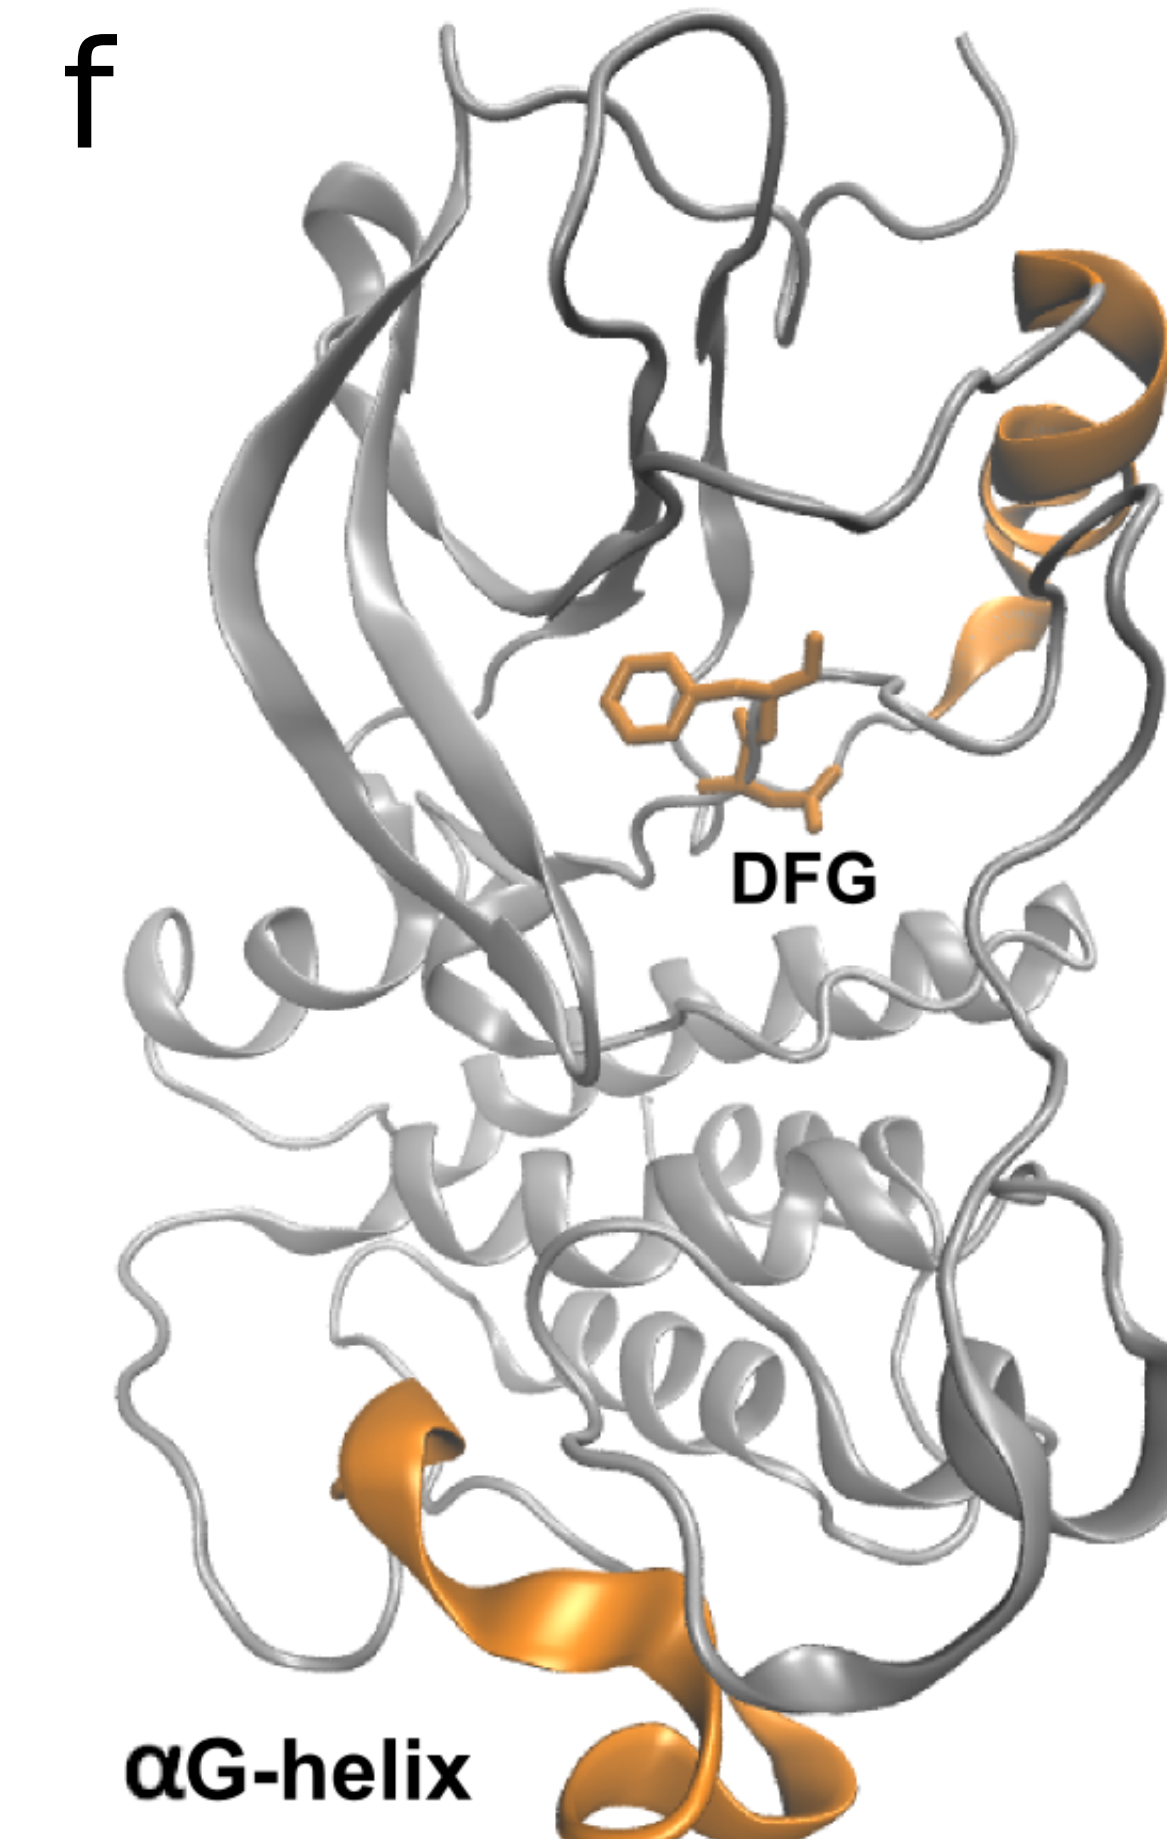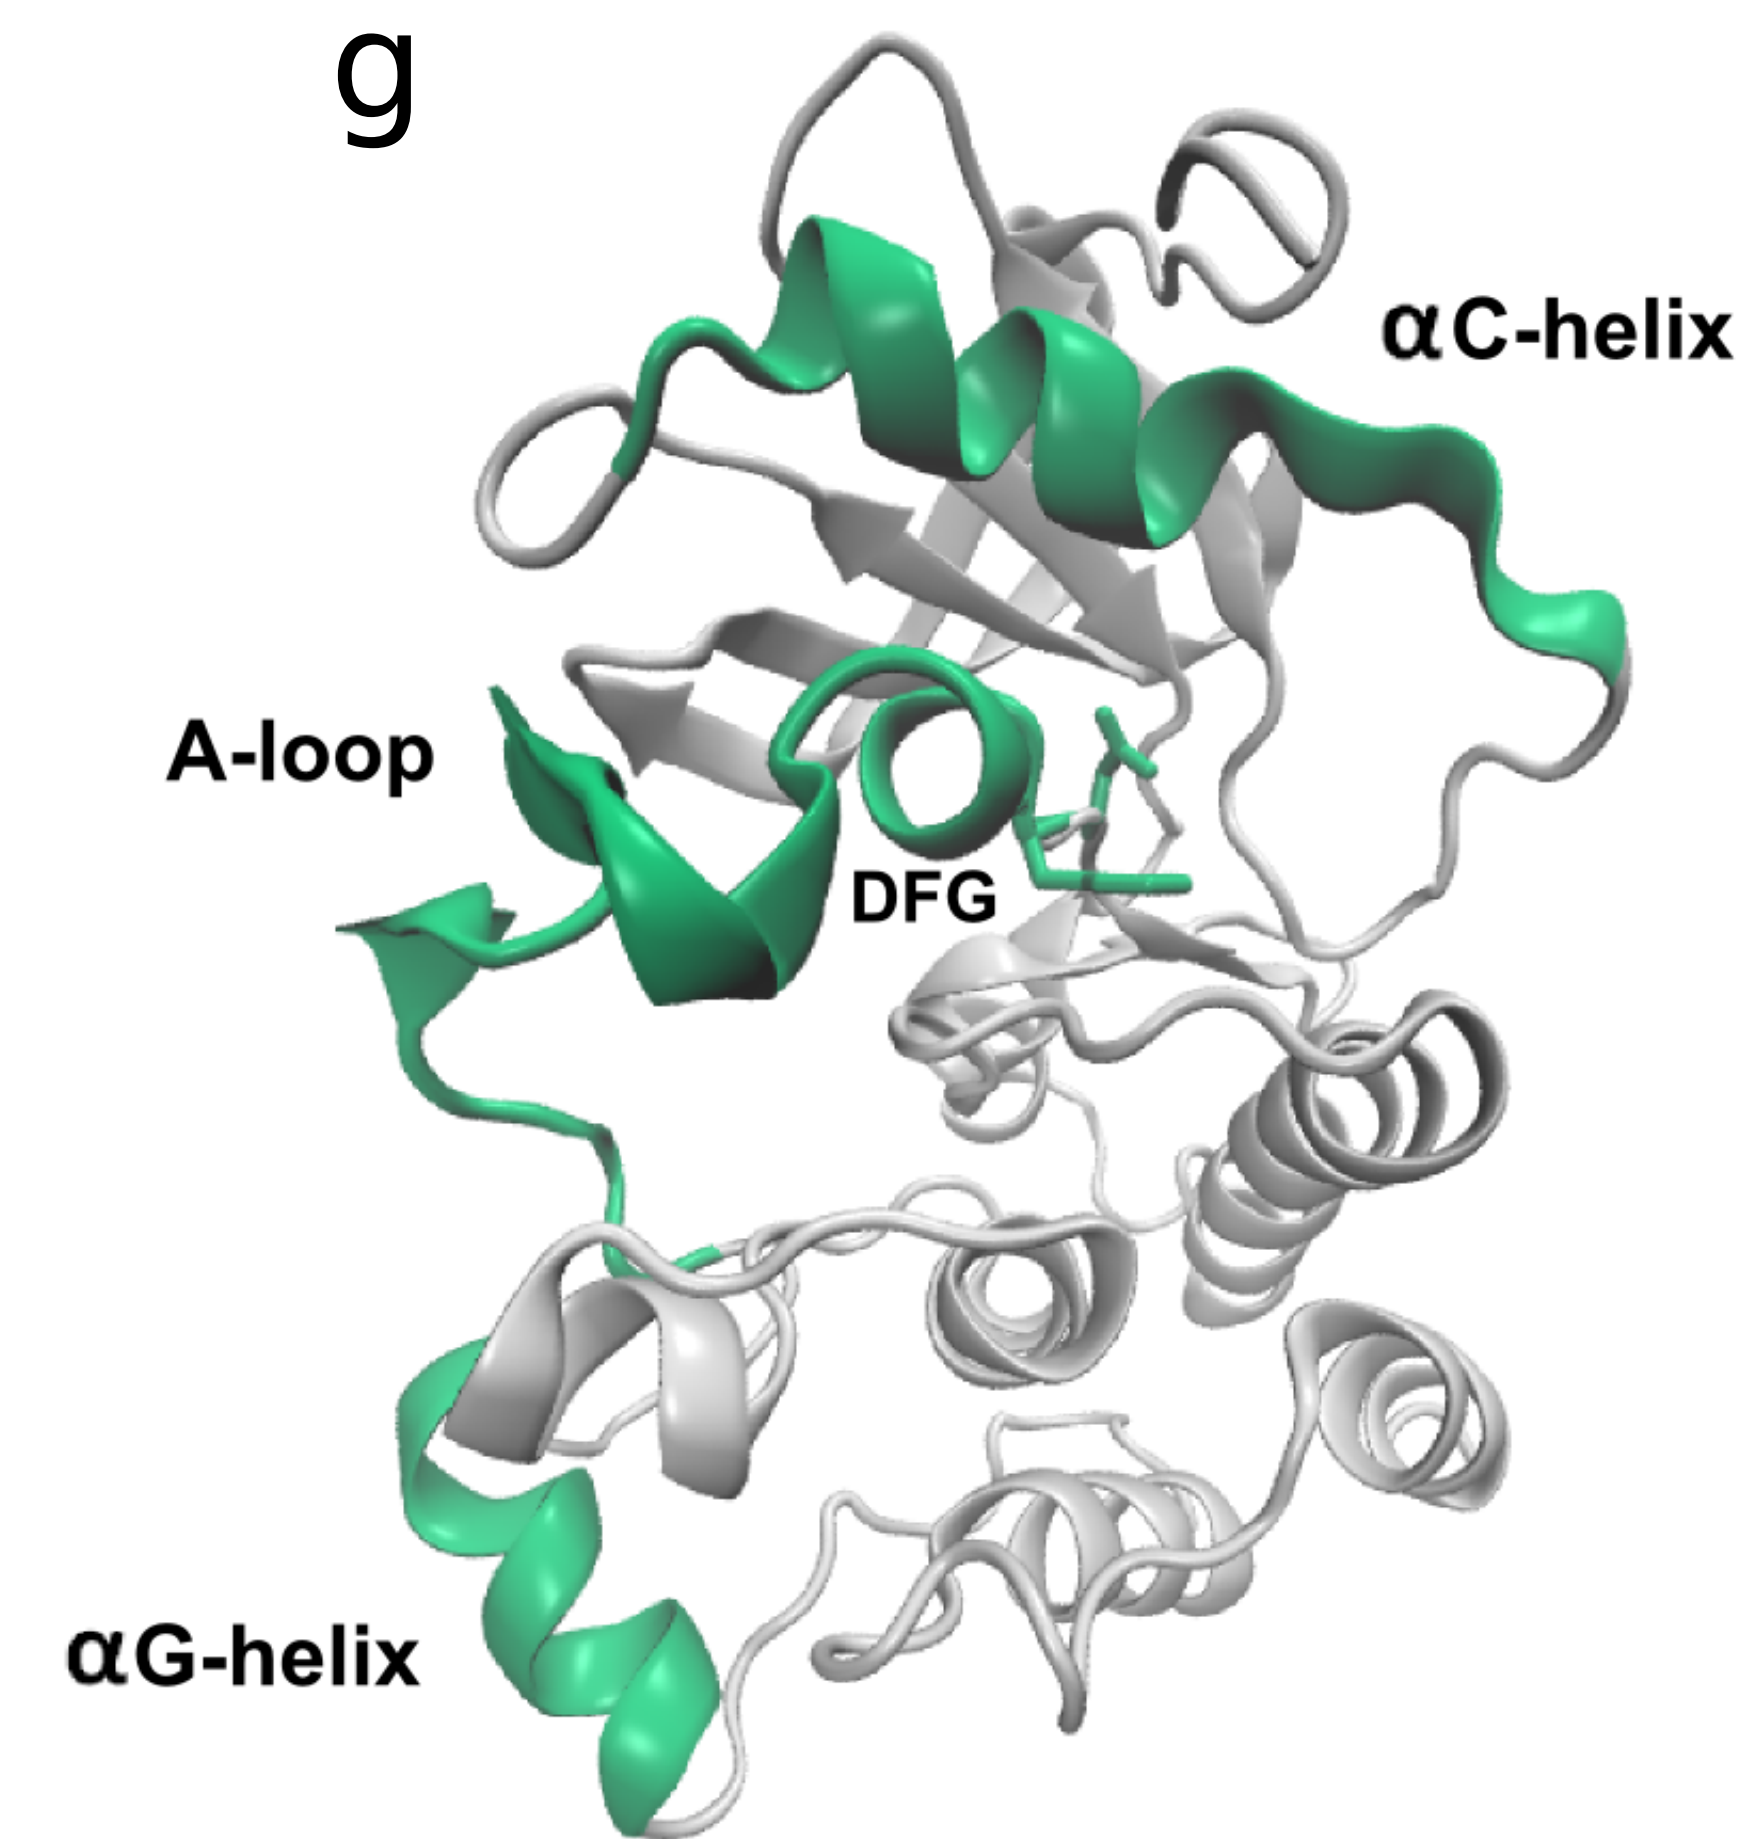

Supplement: Supplementary file 1 [file 1 › S4_Fig.pdf]

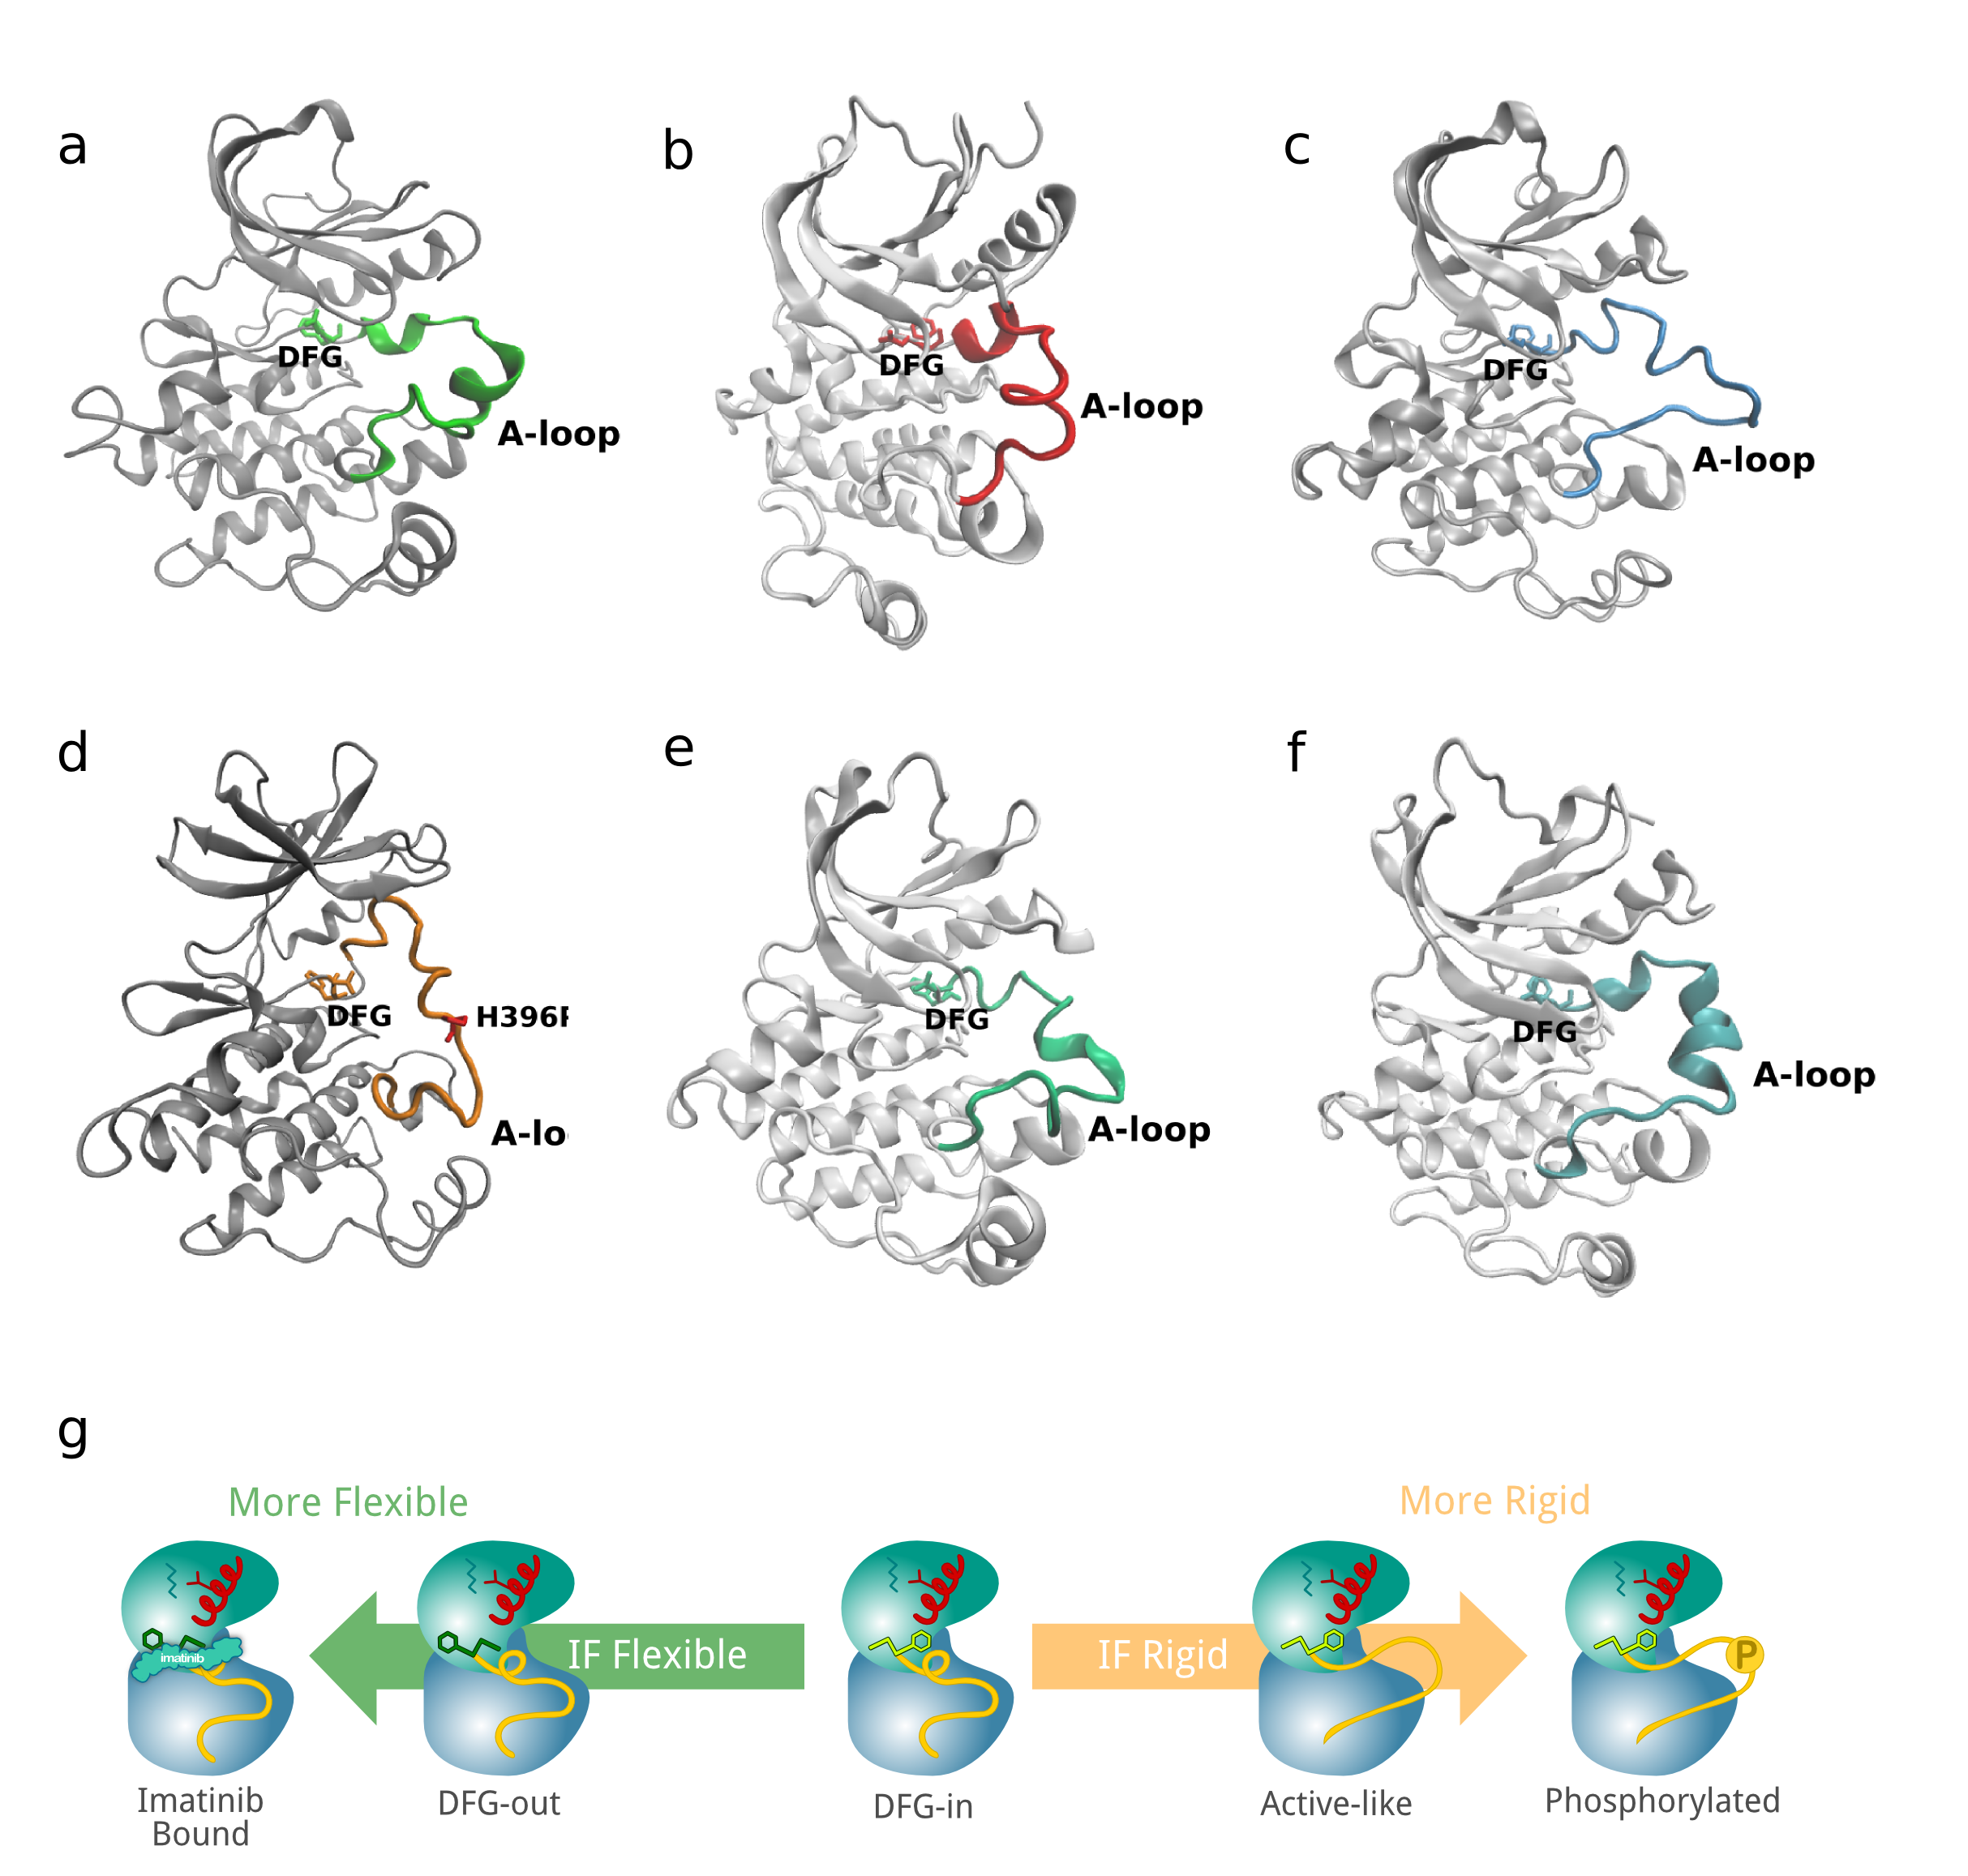

Supplement: Supplementary file 1 [file 1 › S5_Fig.png]

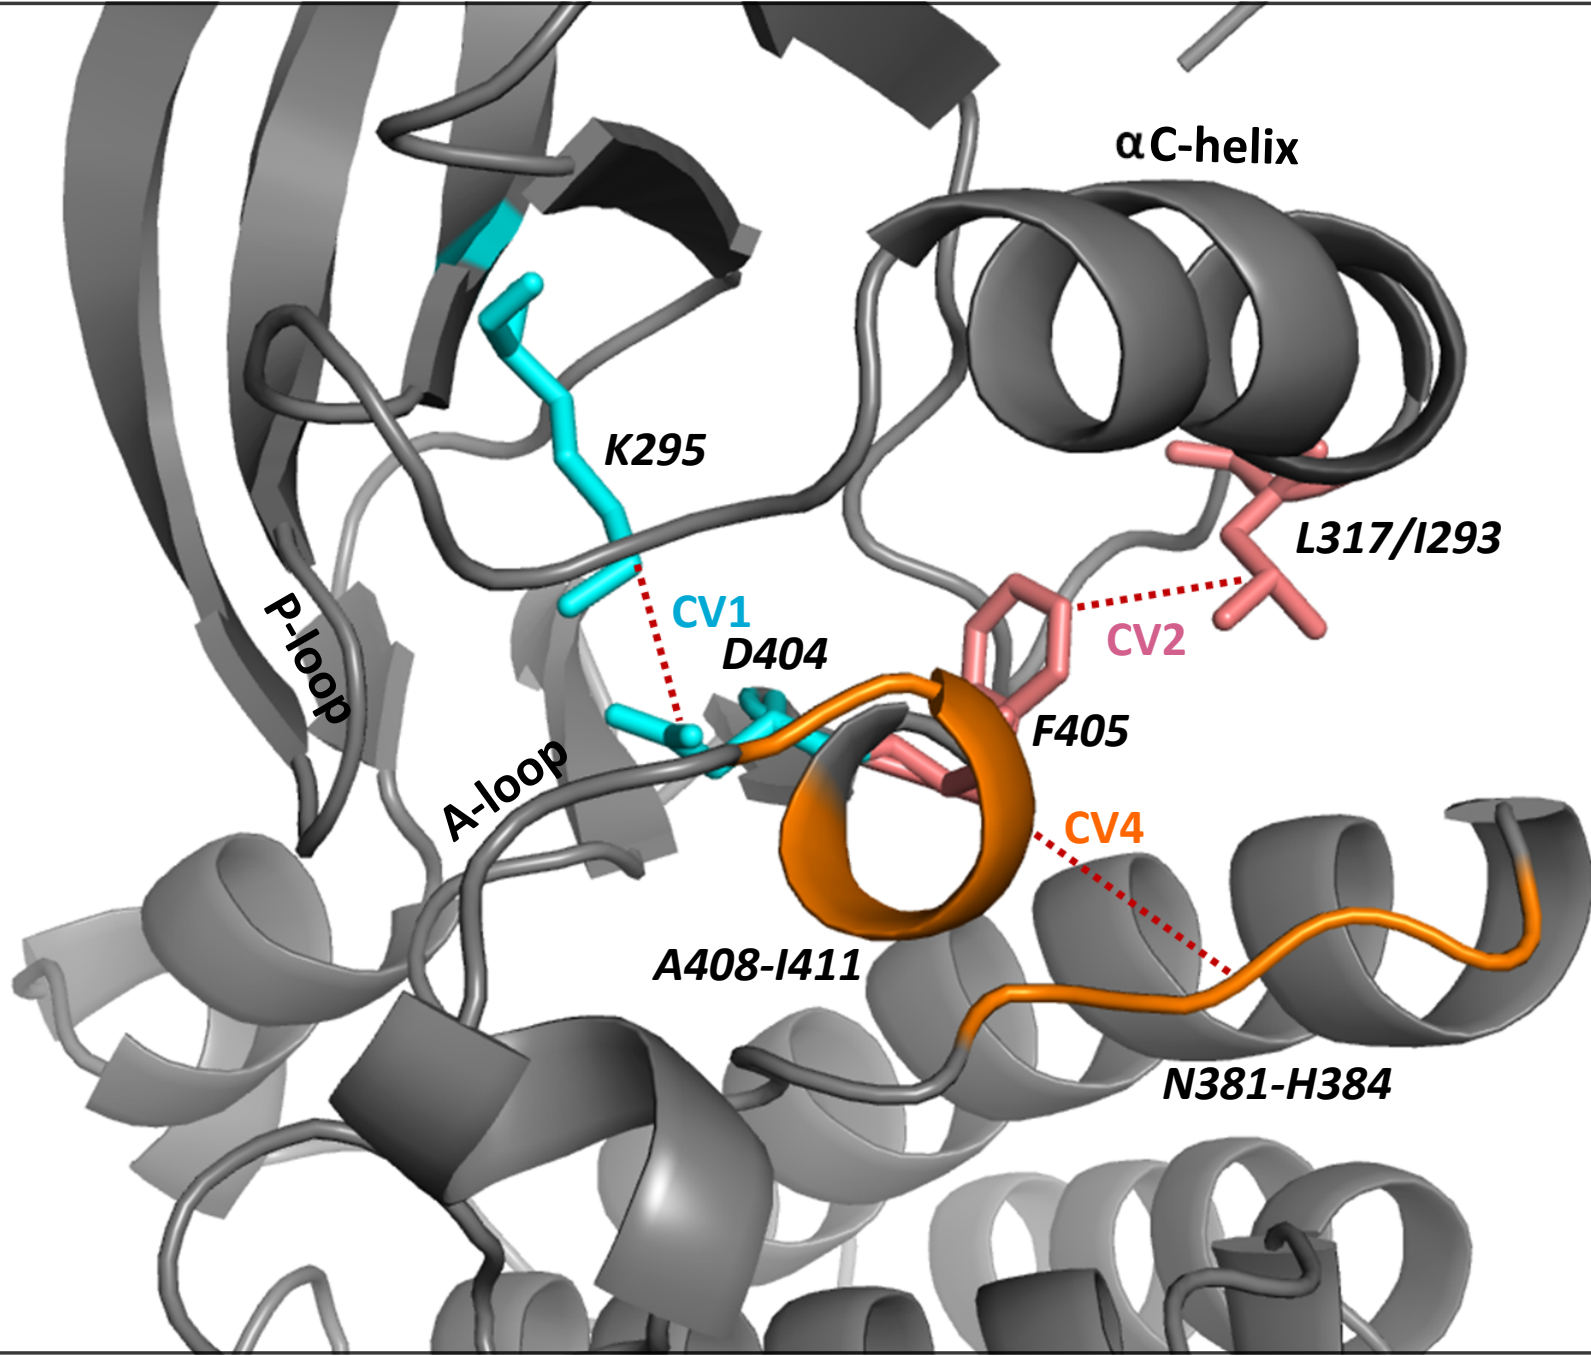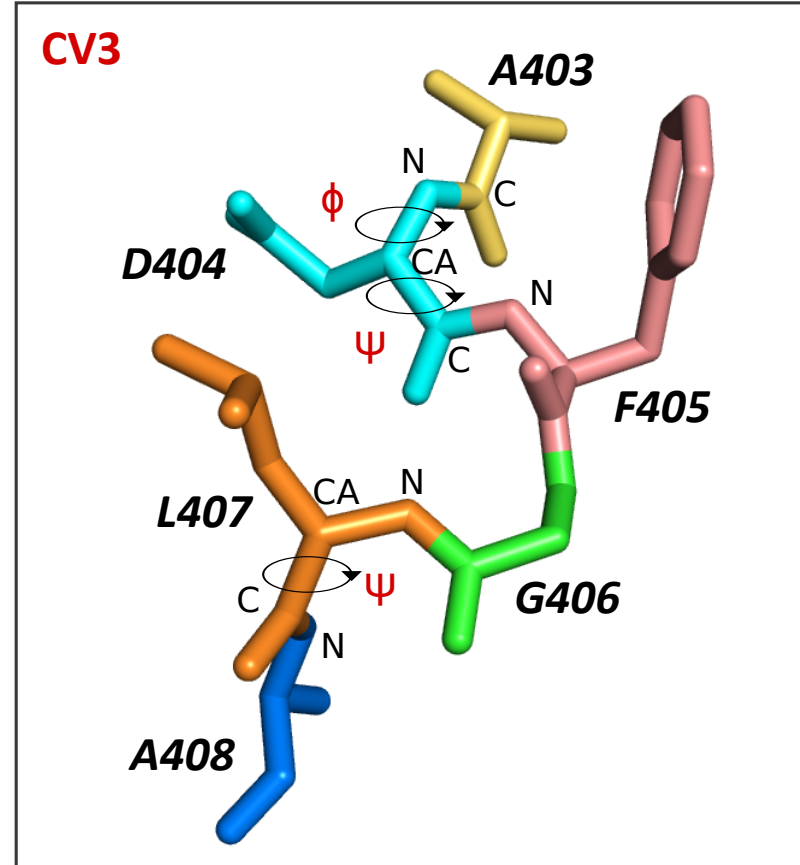

Supplement: Supplementary file 1 [file 1 › S6_Fig.pdf]

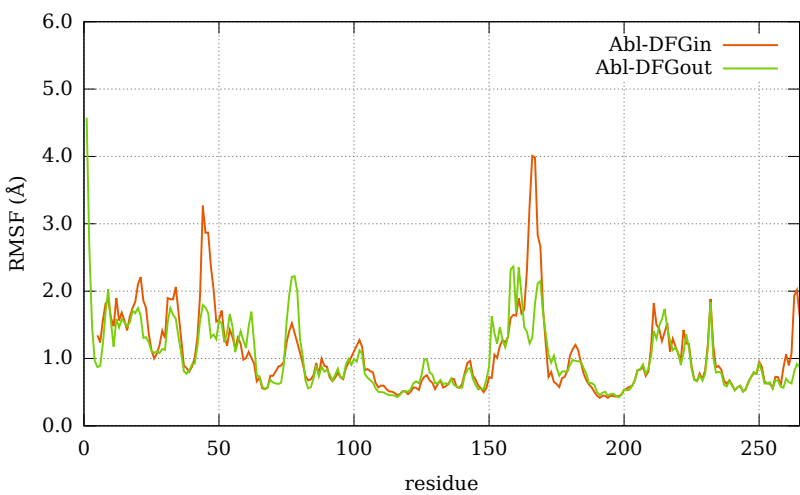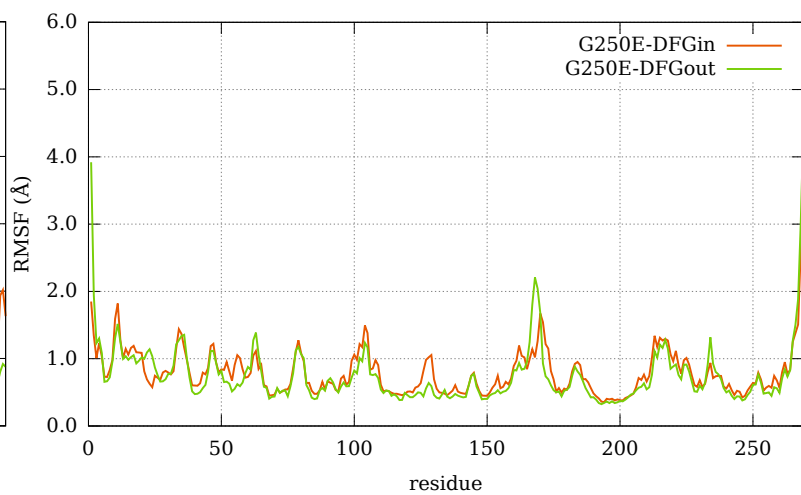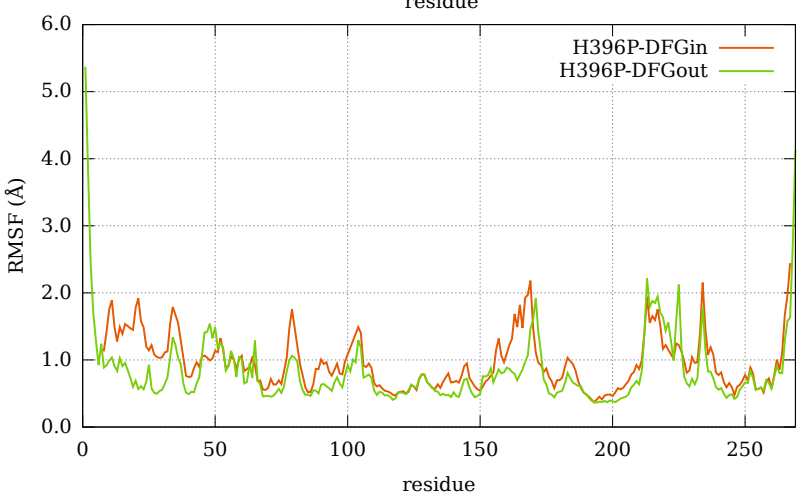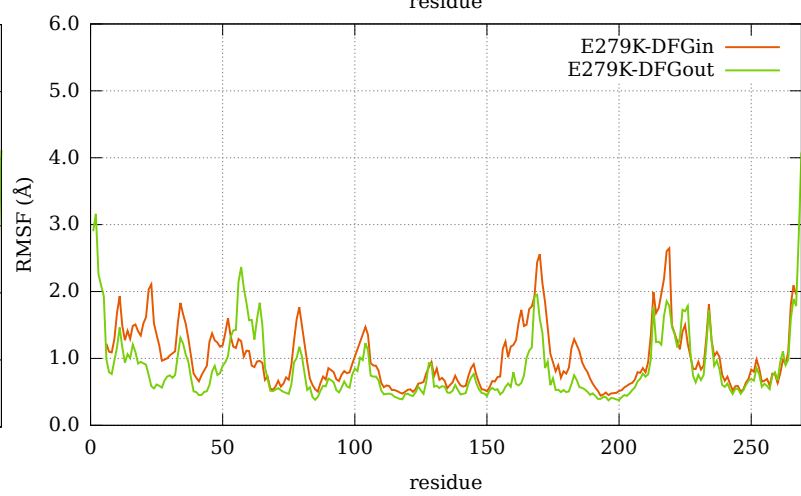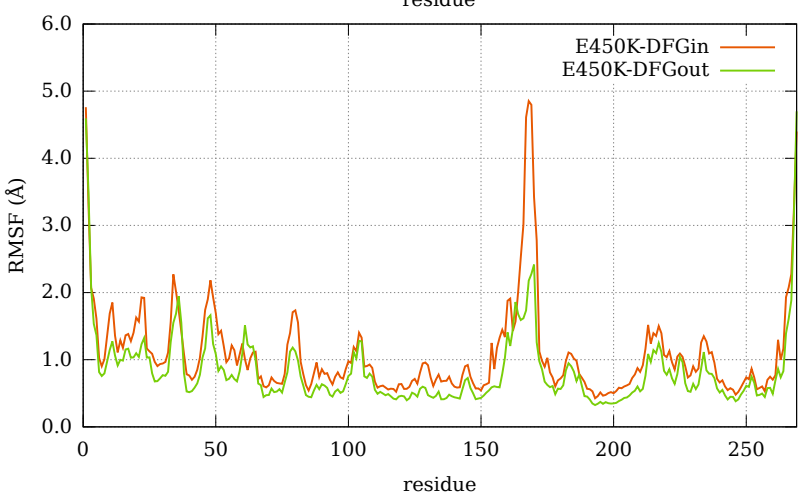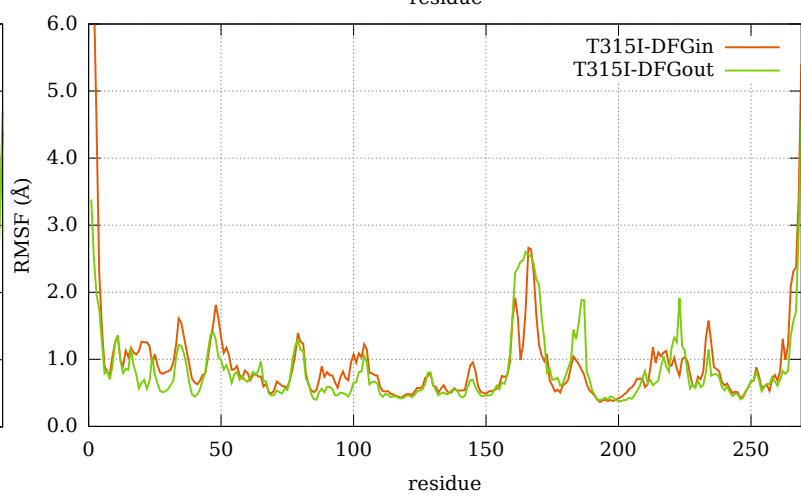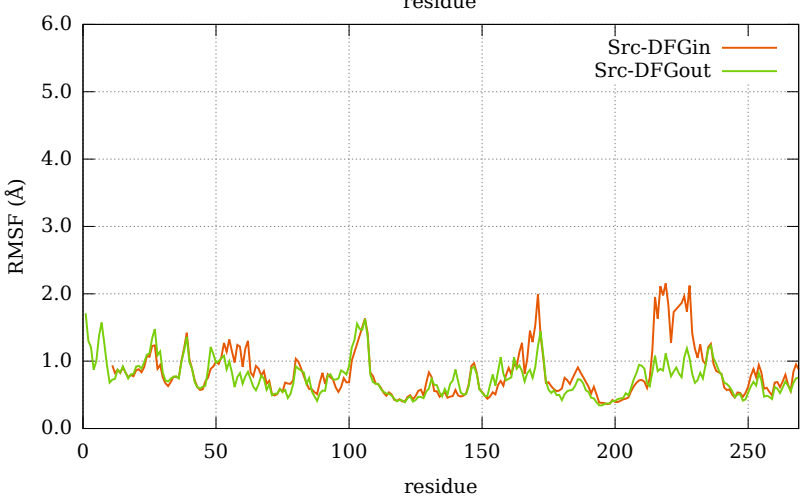

Supplement: Supplementary file 1 [file 1 › S7_Fig.pdf]

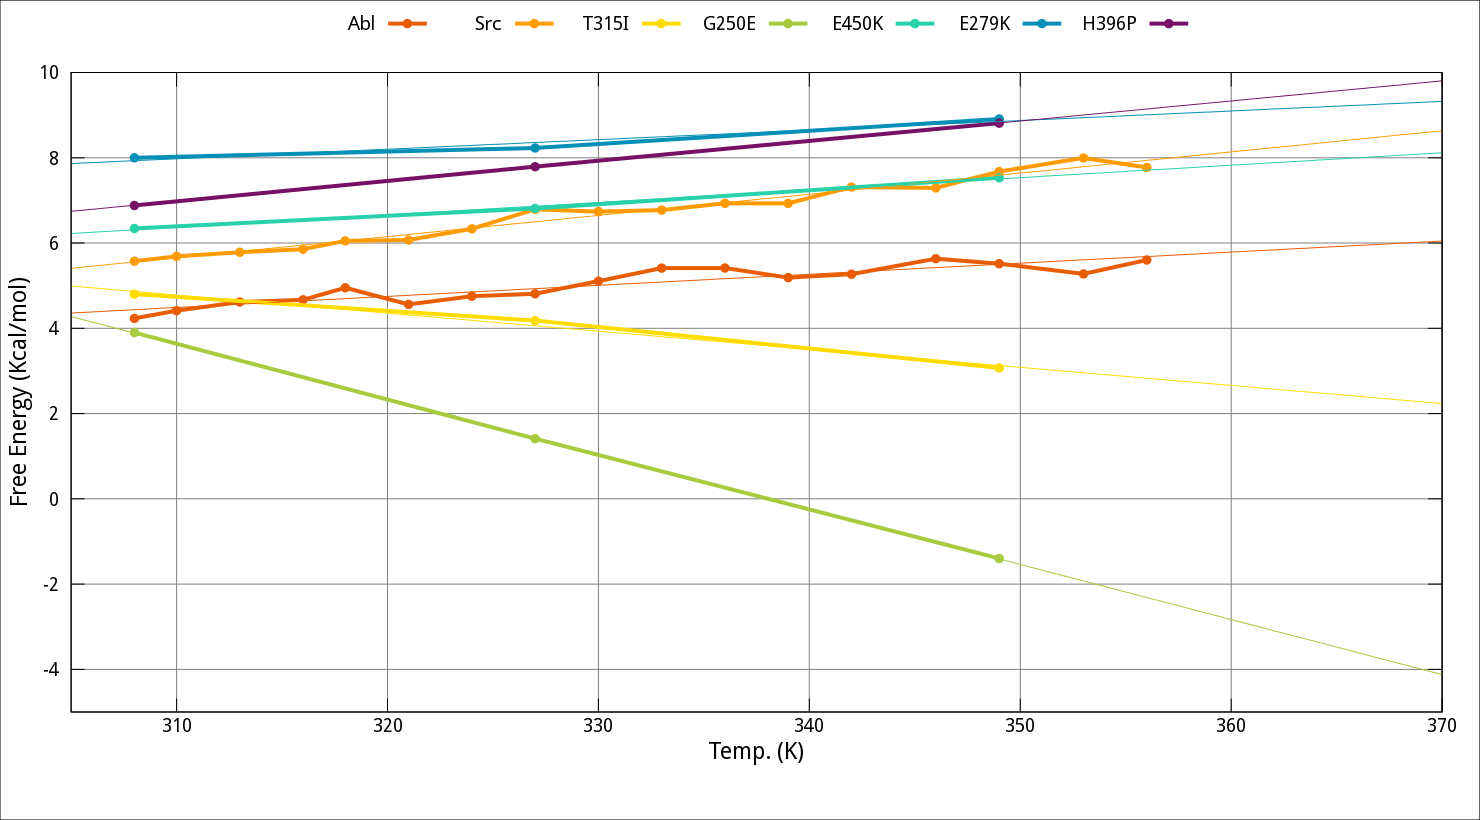

Supplement: Supplementary file 1 [file 1 › S8_Fig.png]

# Abl

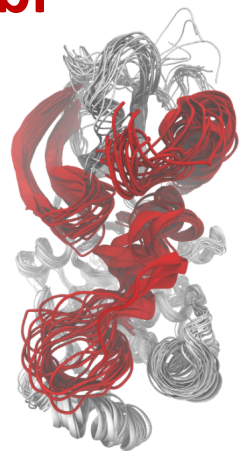

## G250E

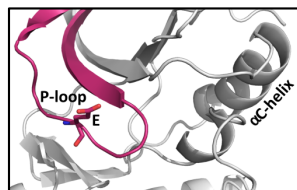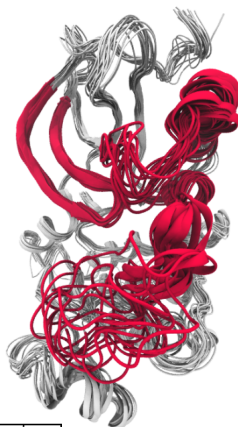

## E279K

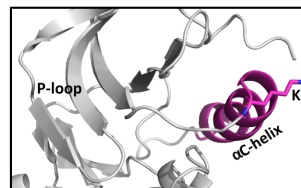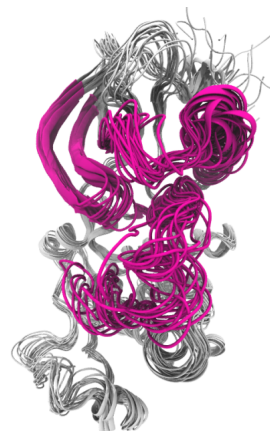

## H396P

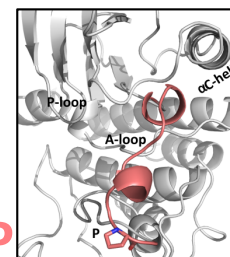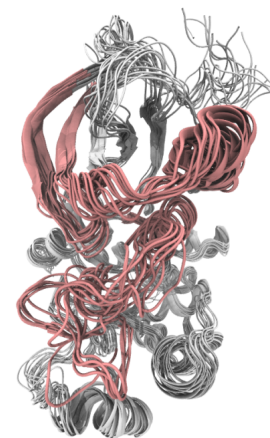

# Src

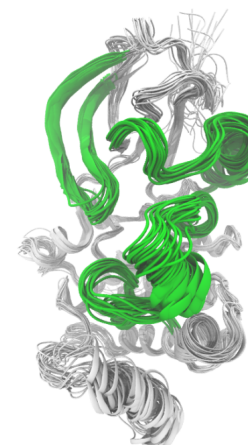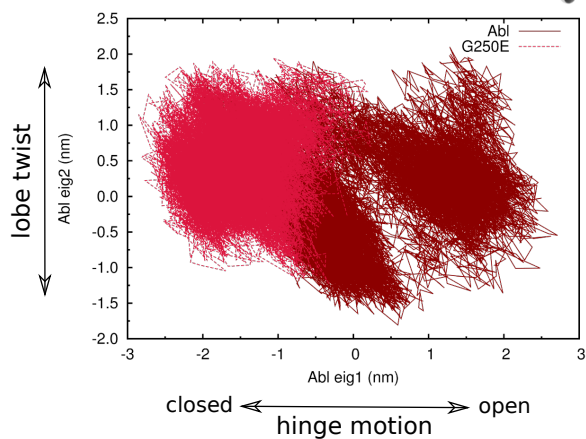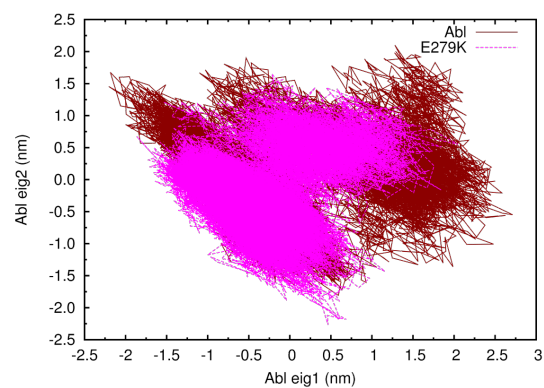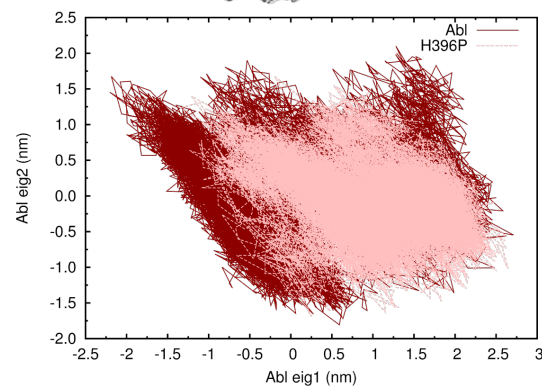

Supplement: Supplementary file 1 [file 1 › S9_Fig.pdf]

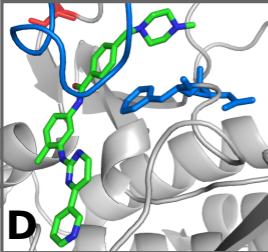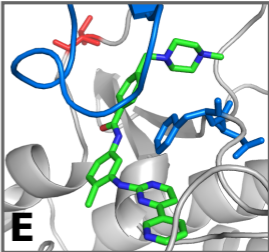

Supplement: Supplementary file 1 [file 1 › S10_Fig.pdf]

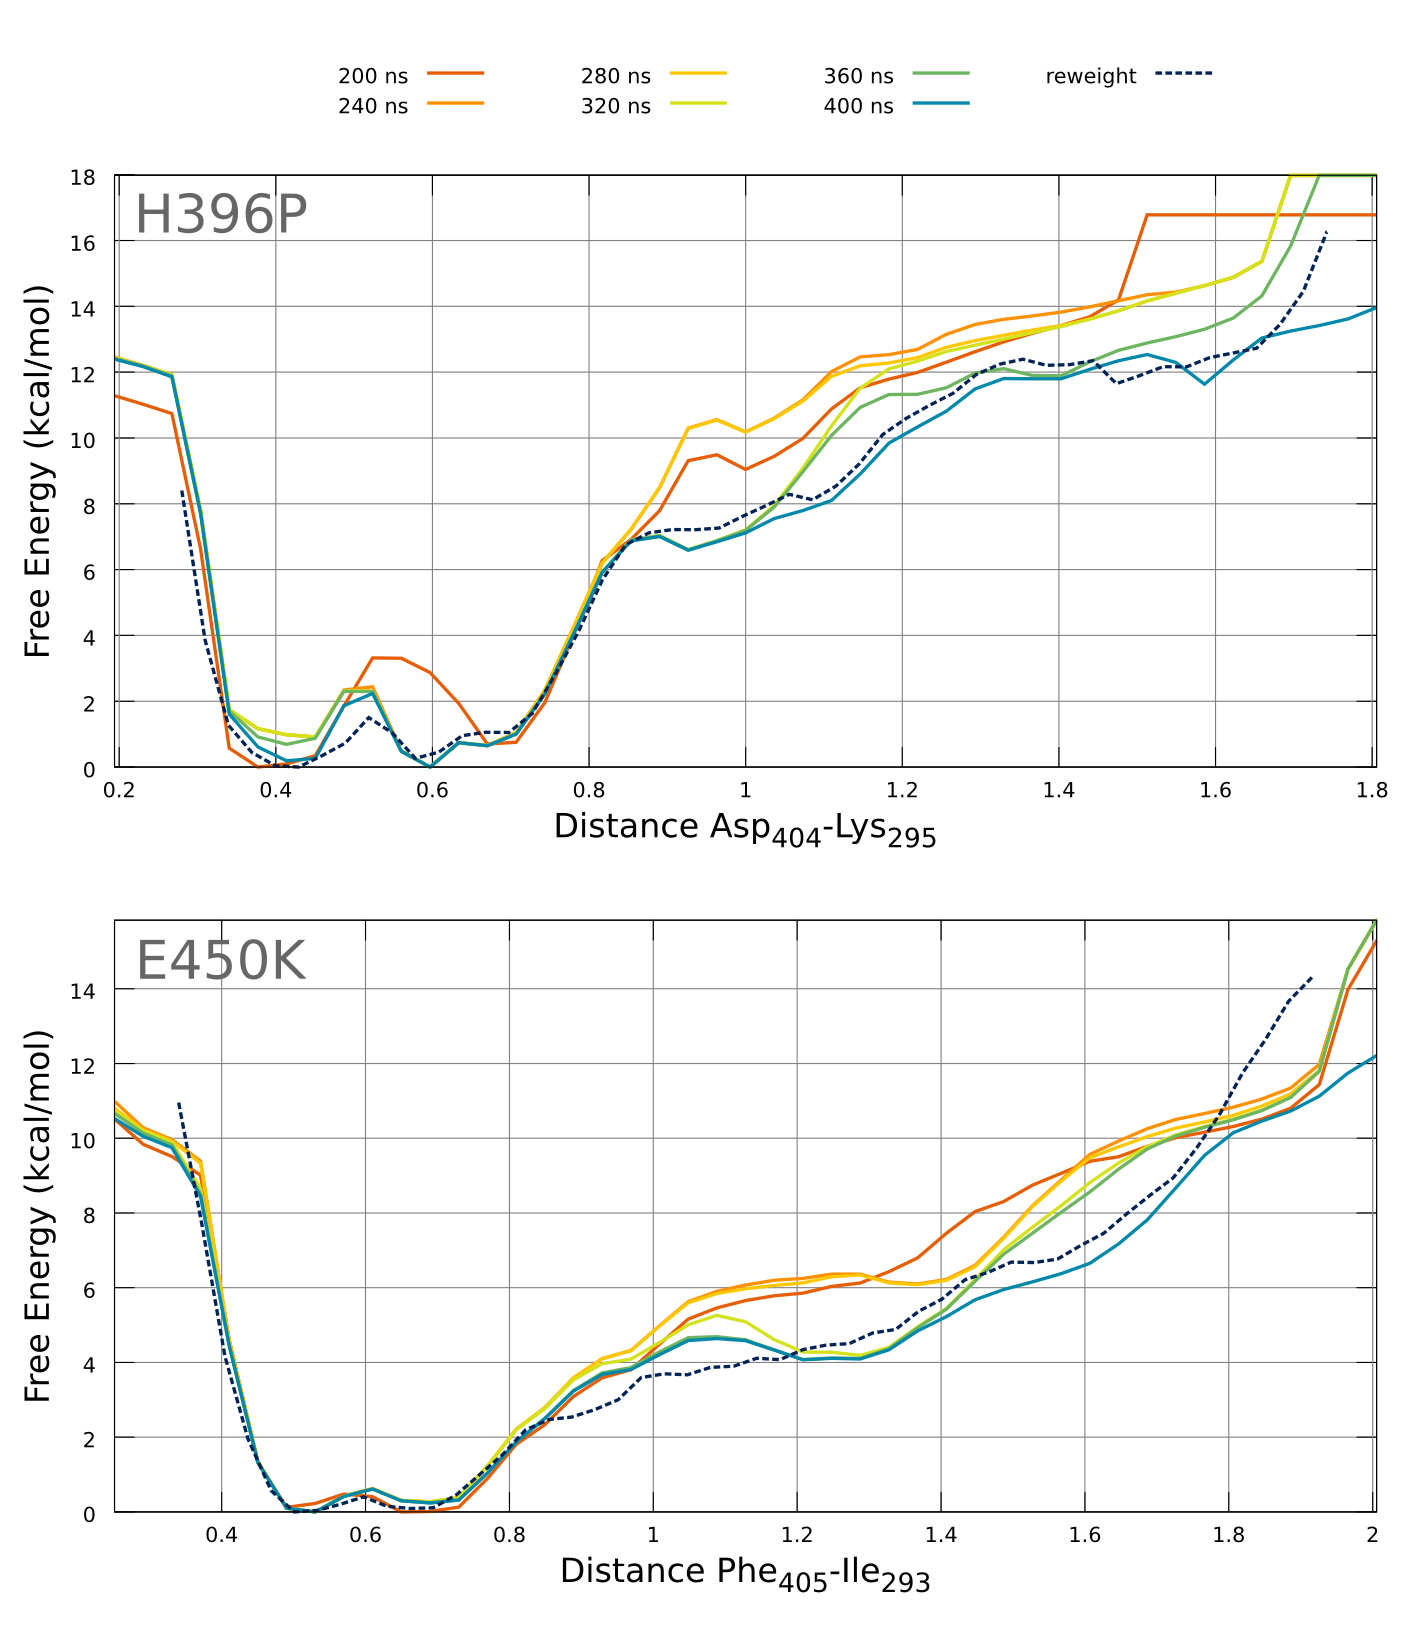

Supplement: Supplementary file 1 [file 1 › S11_Fig.png]

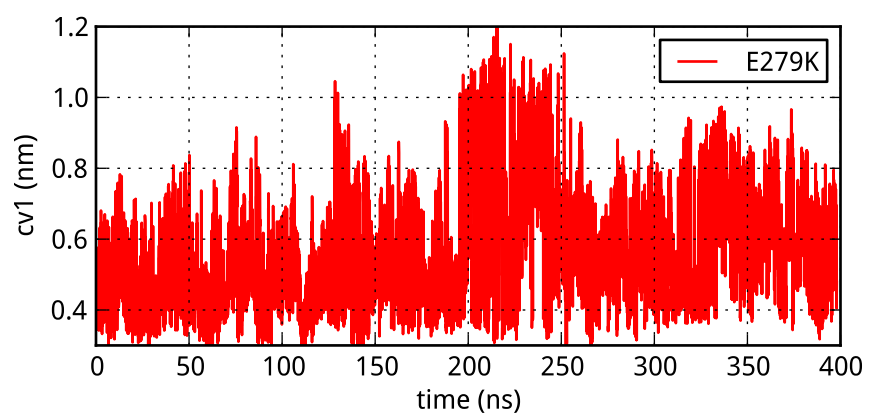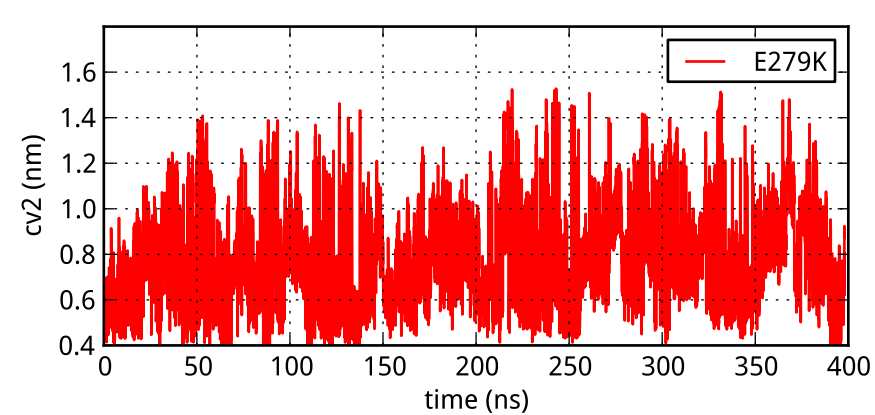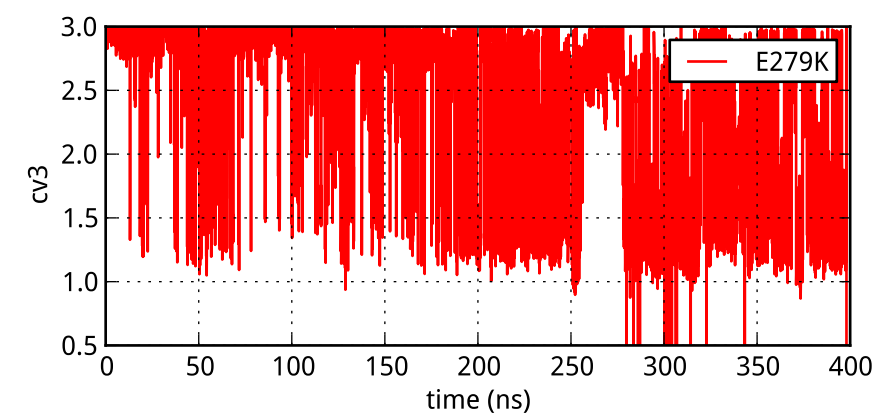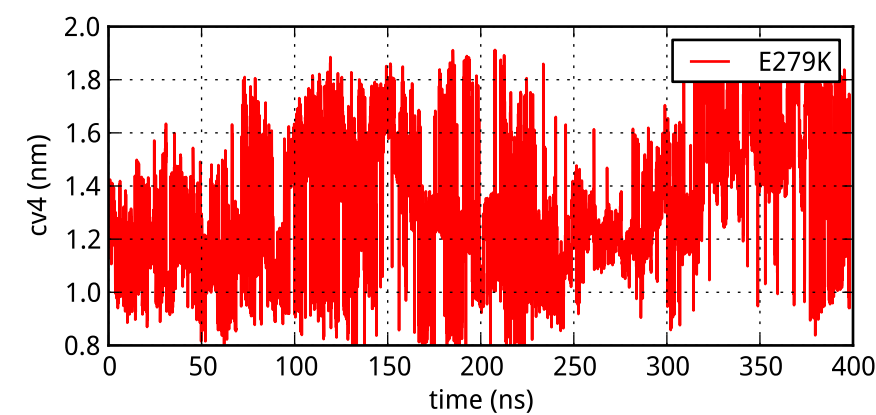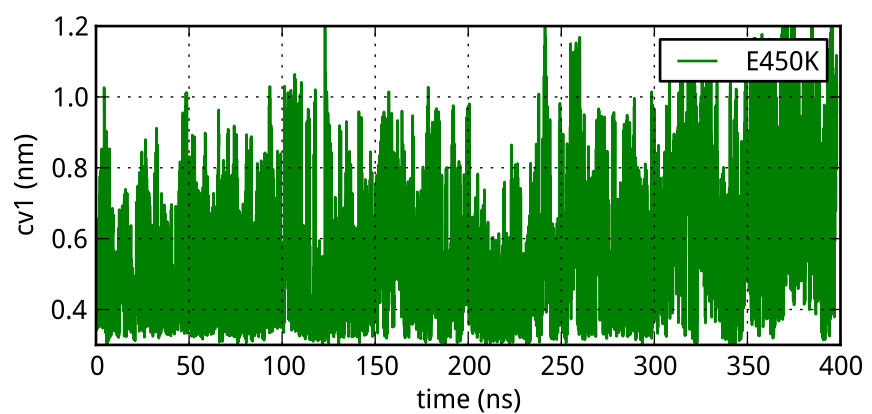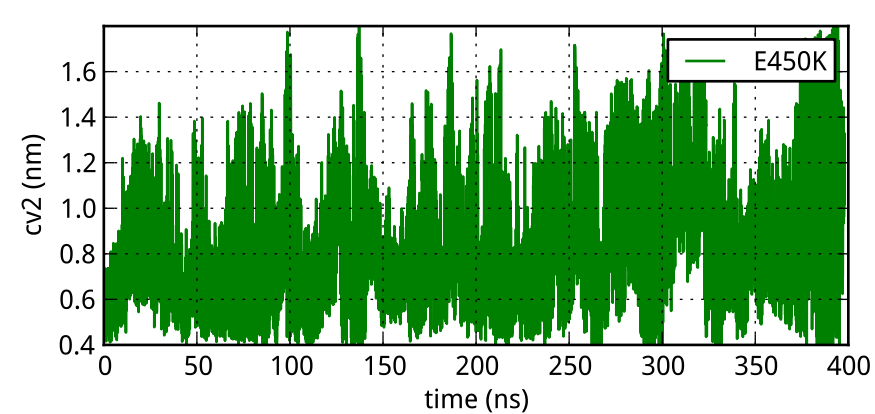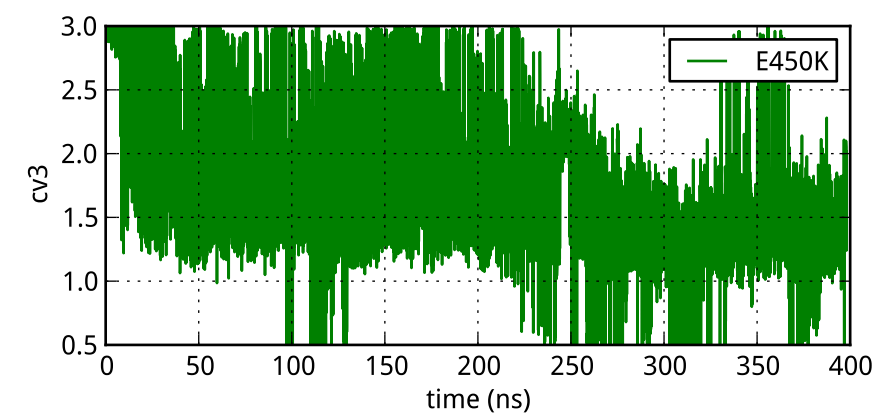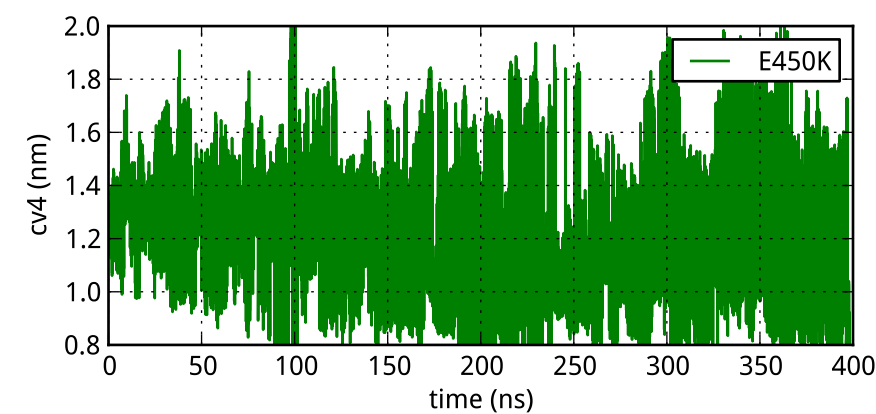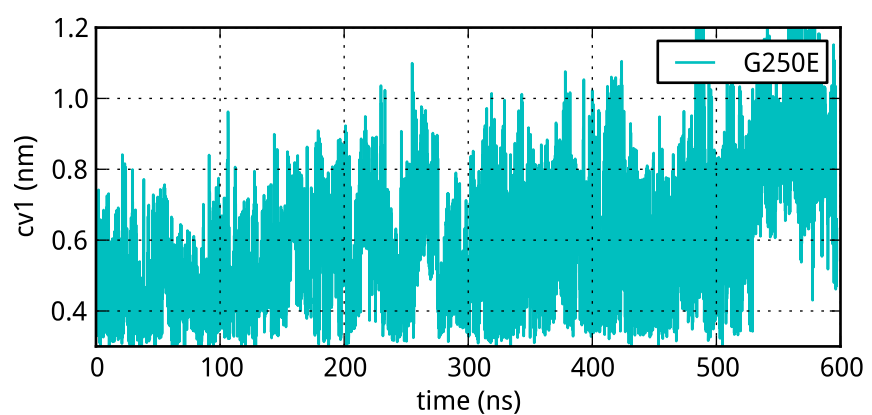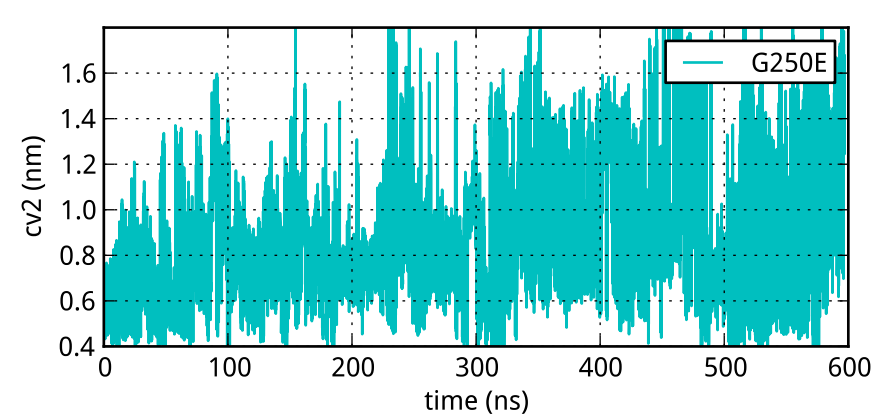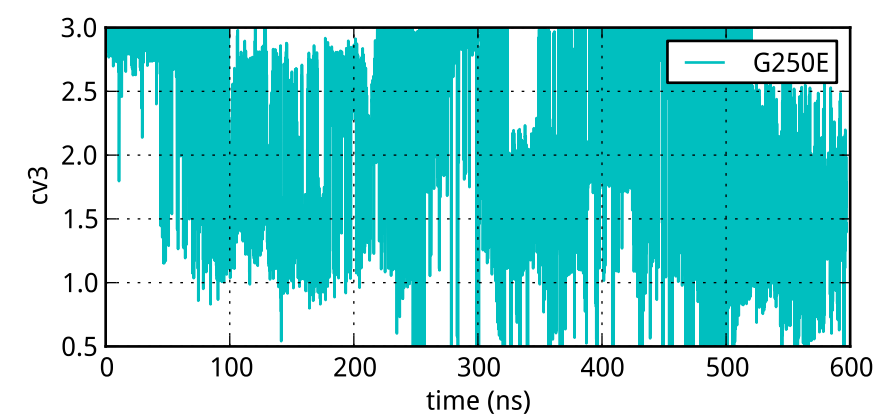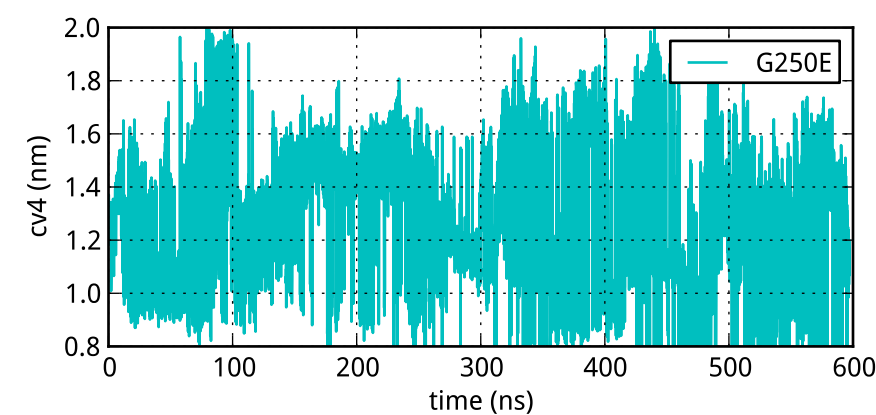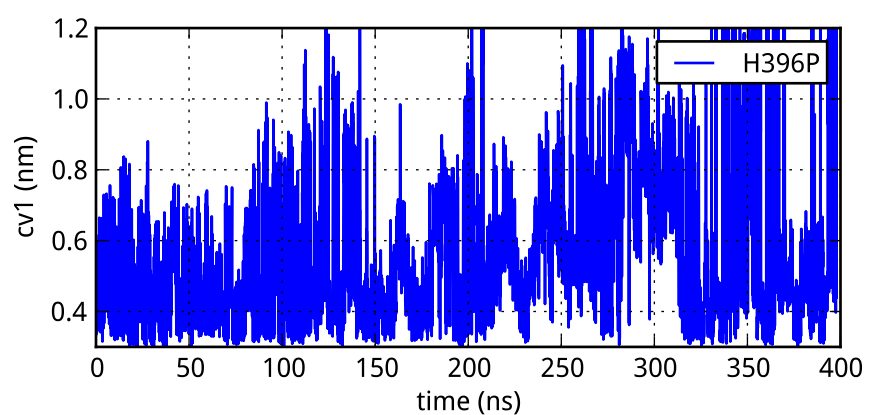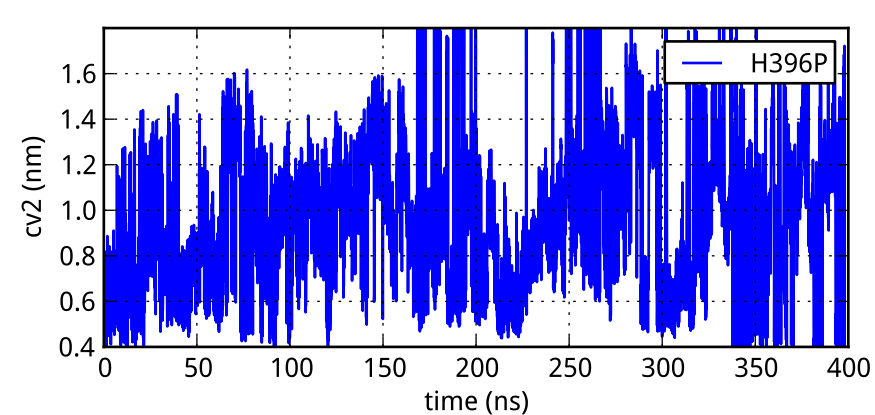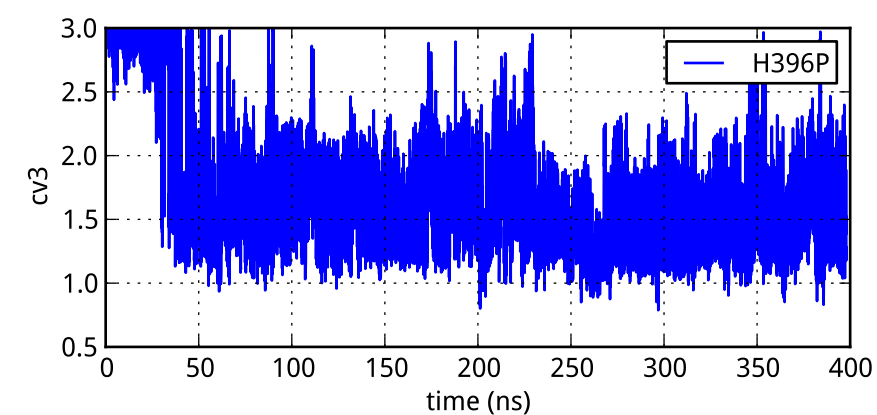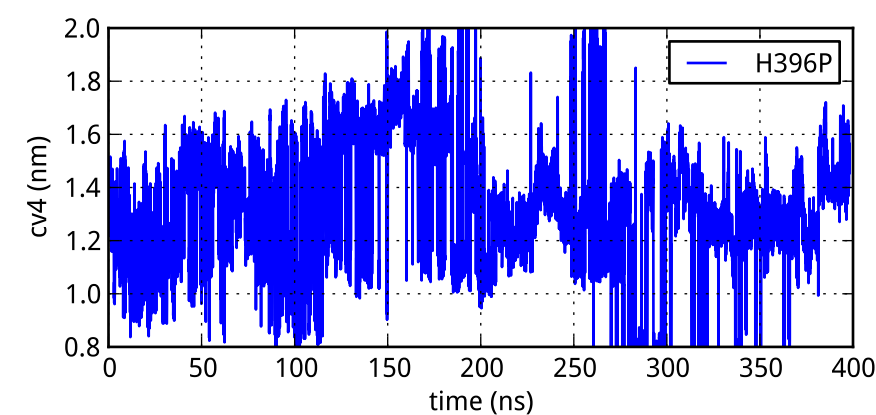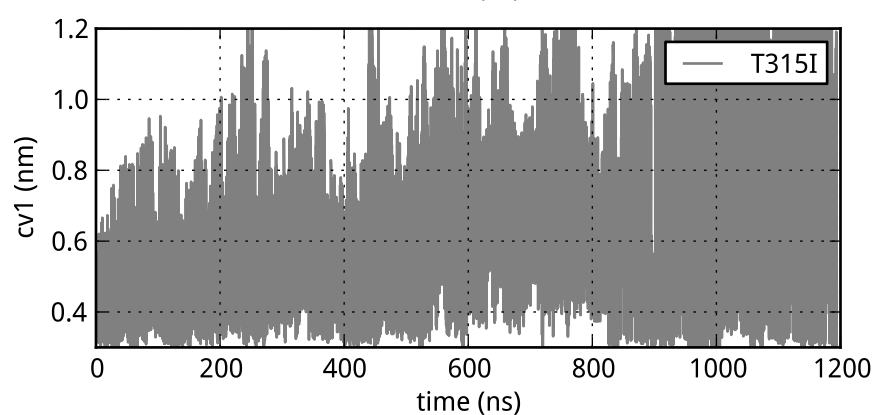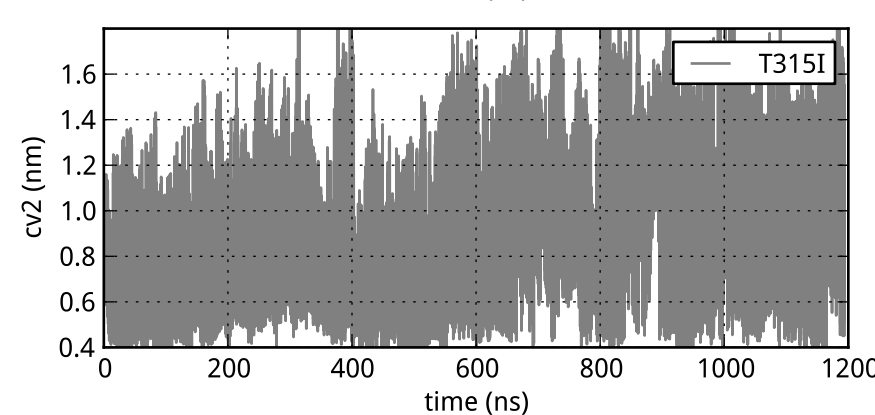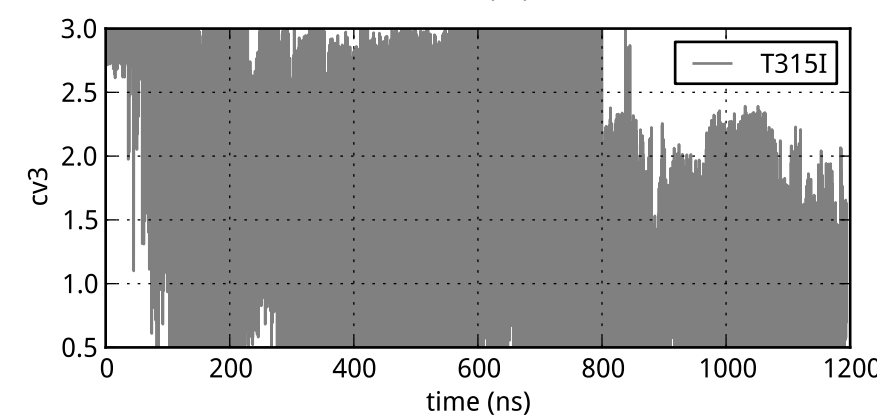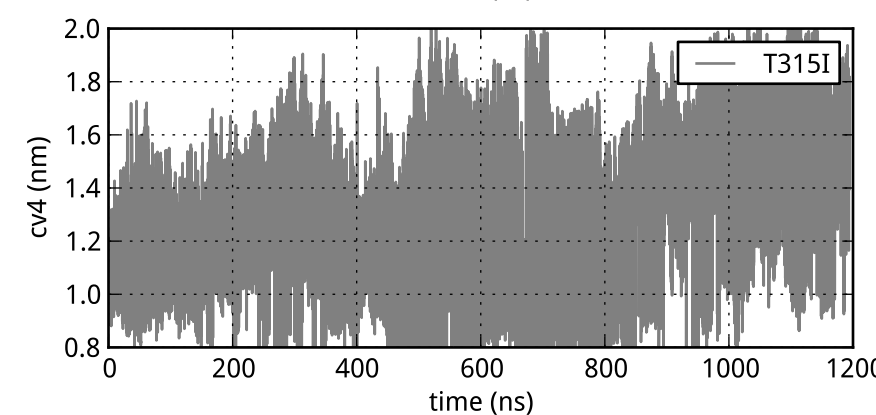

Supplement: Supplementary file 1 [file 1 › S12_Fig.pdf]

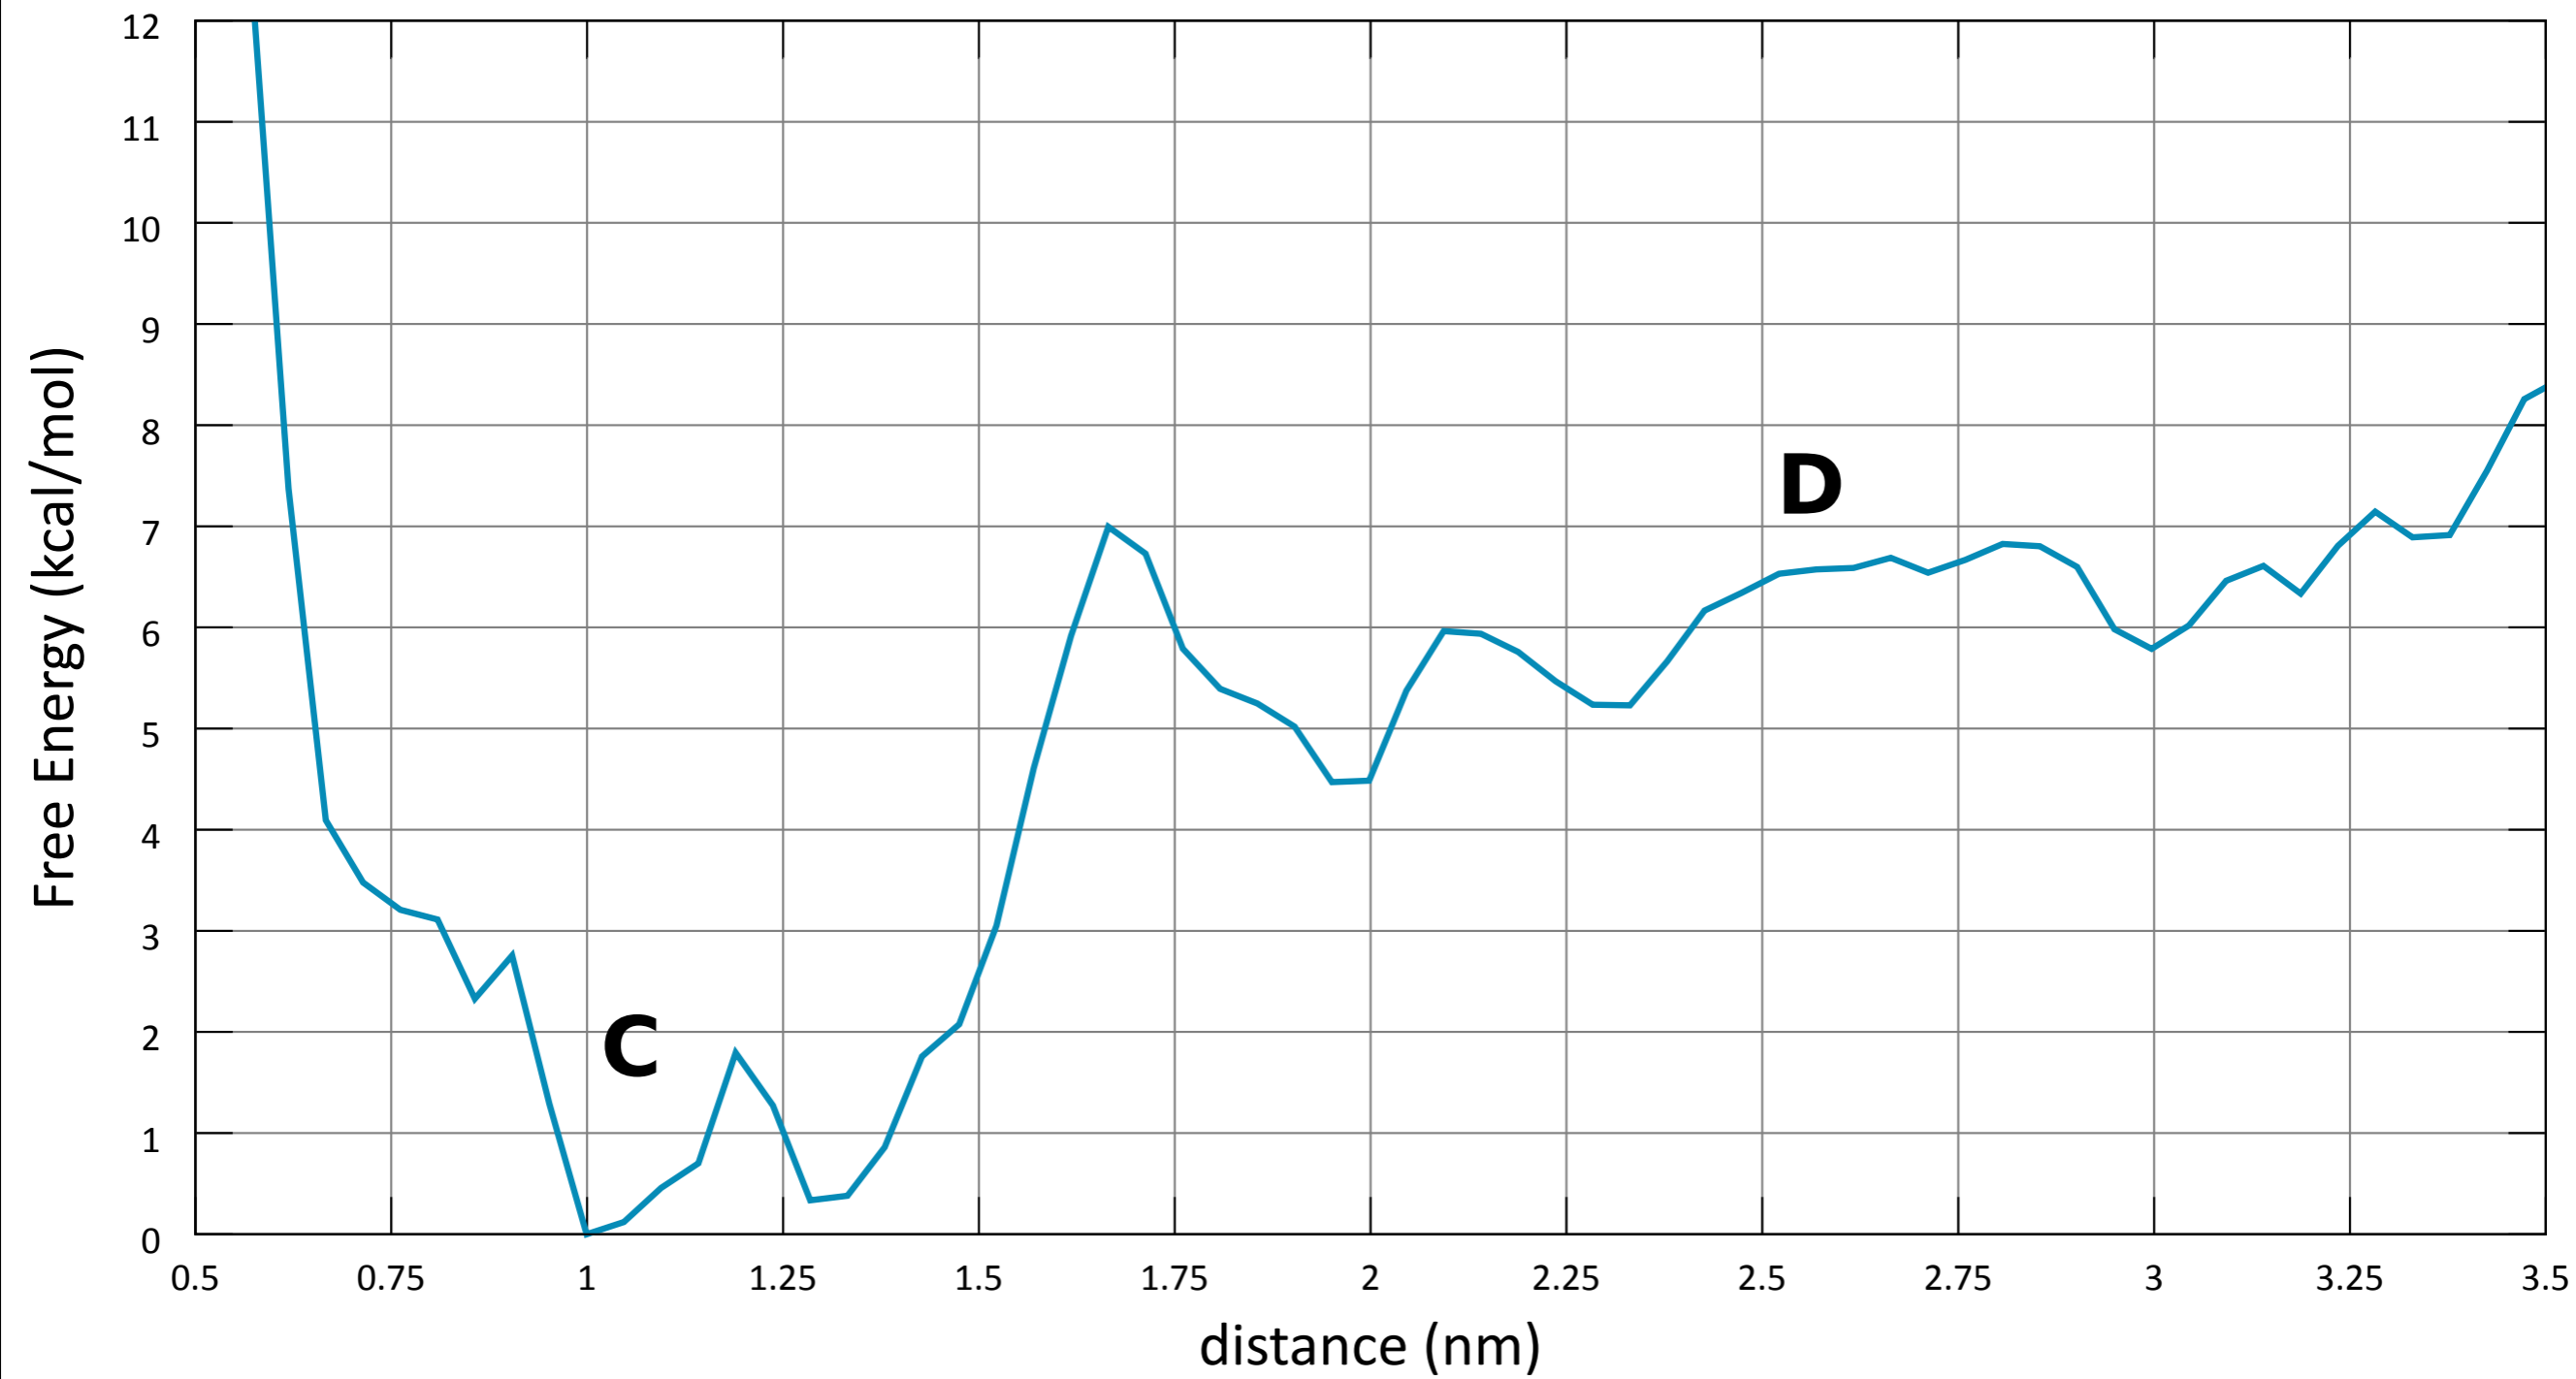

Supplement: Supplementary file 1 [file 1 › S13_Fig.pdf]

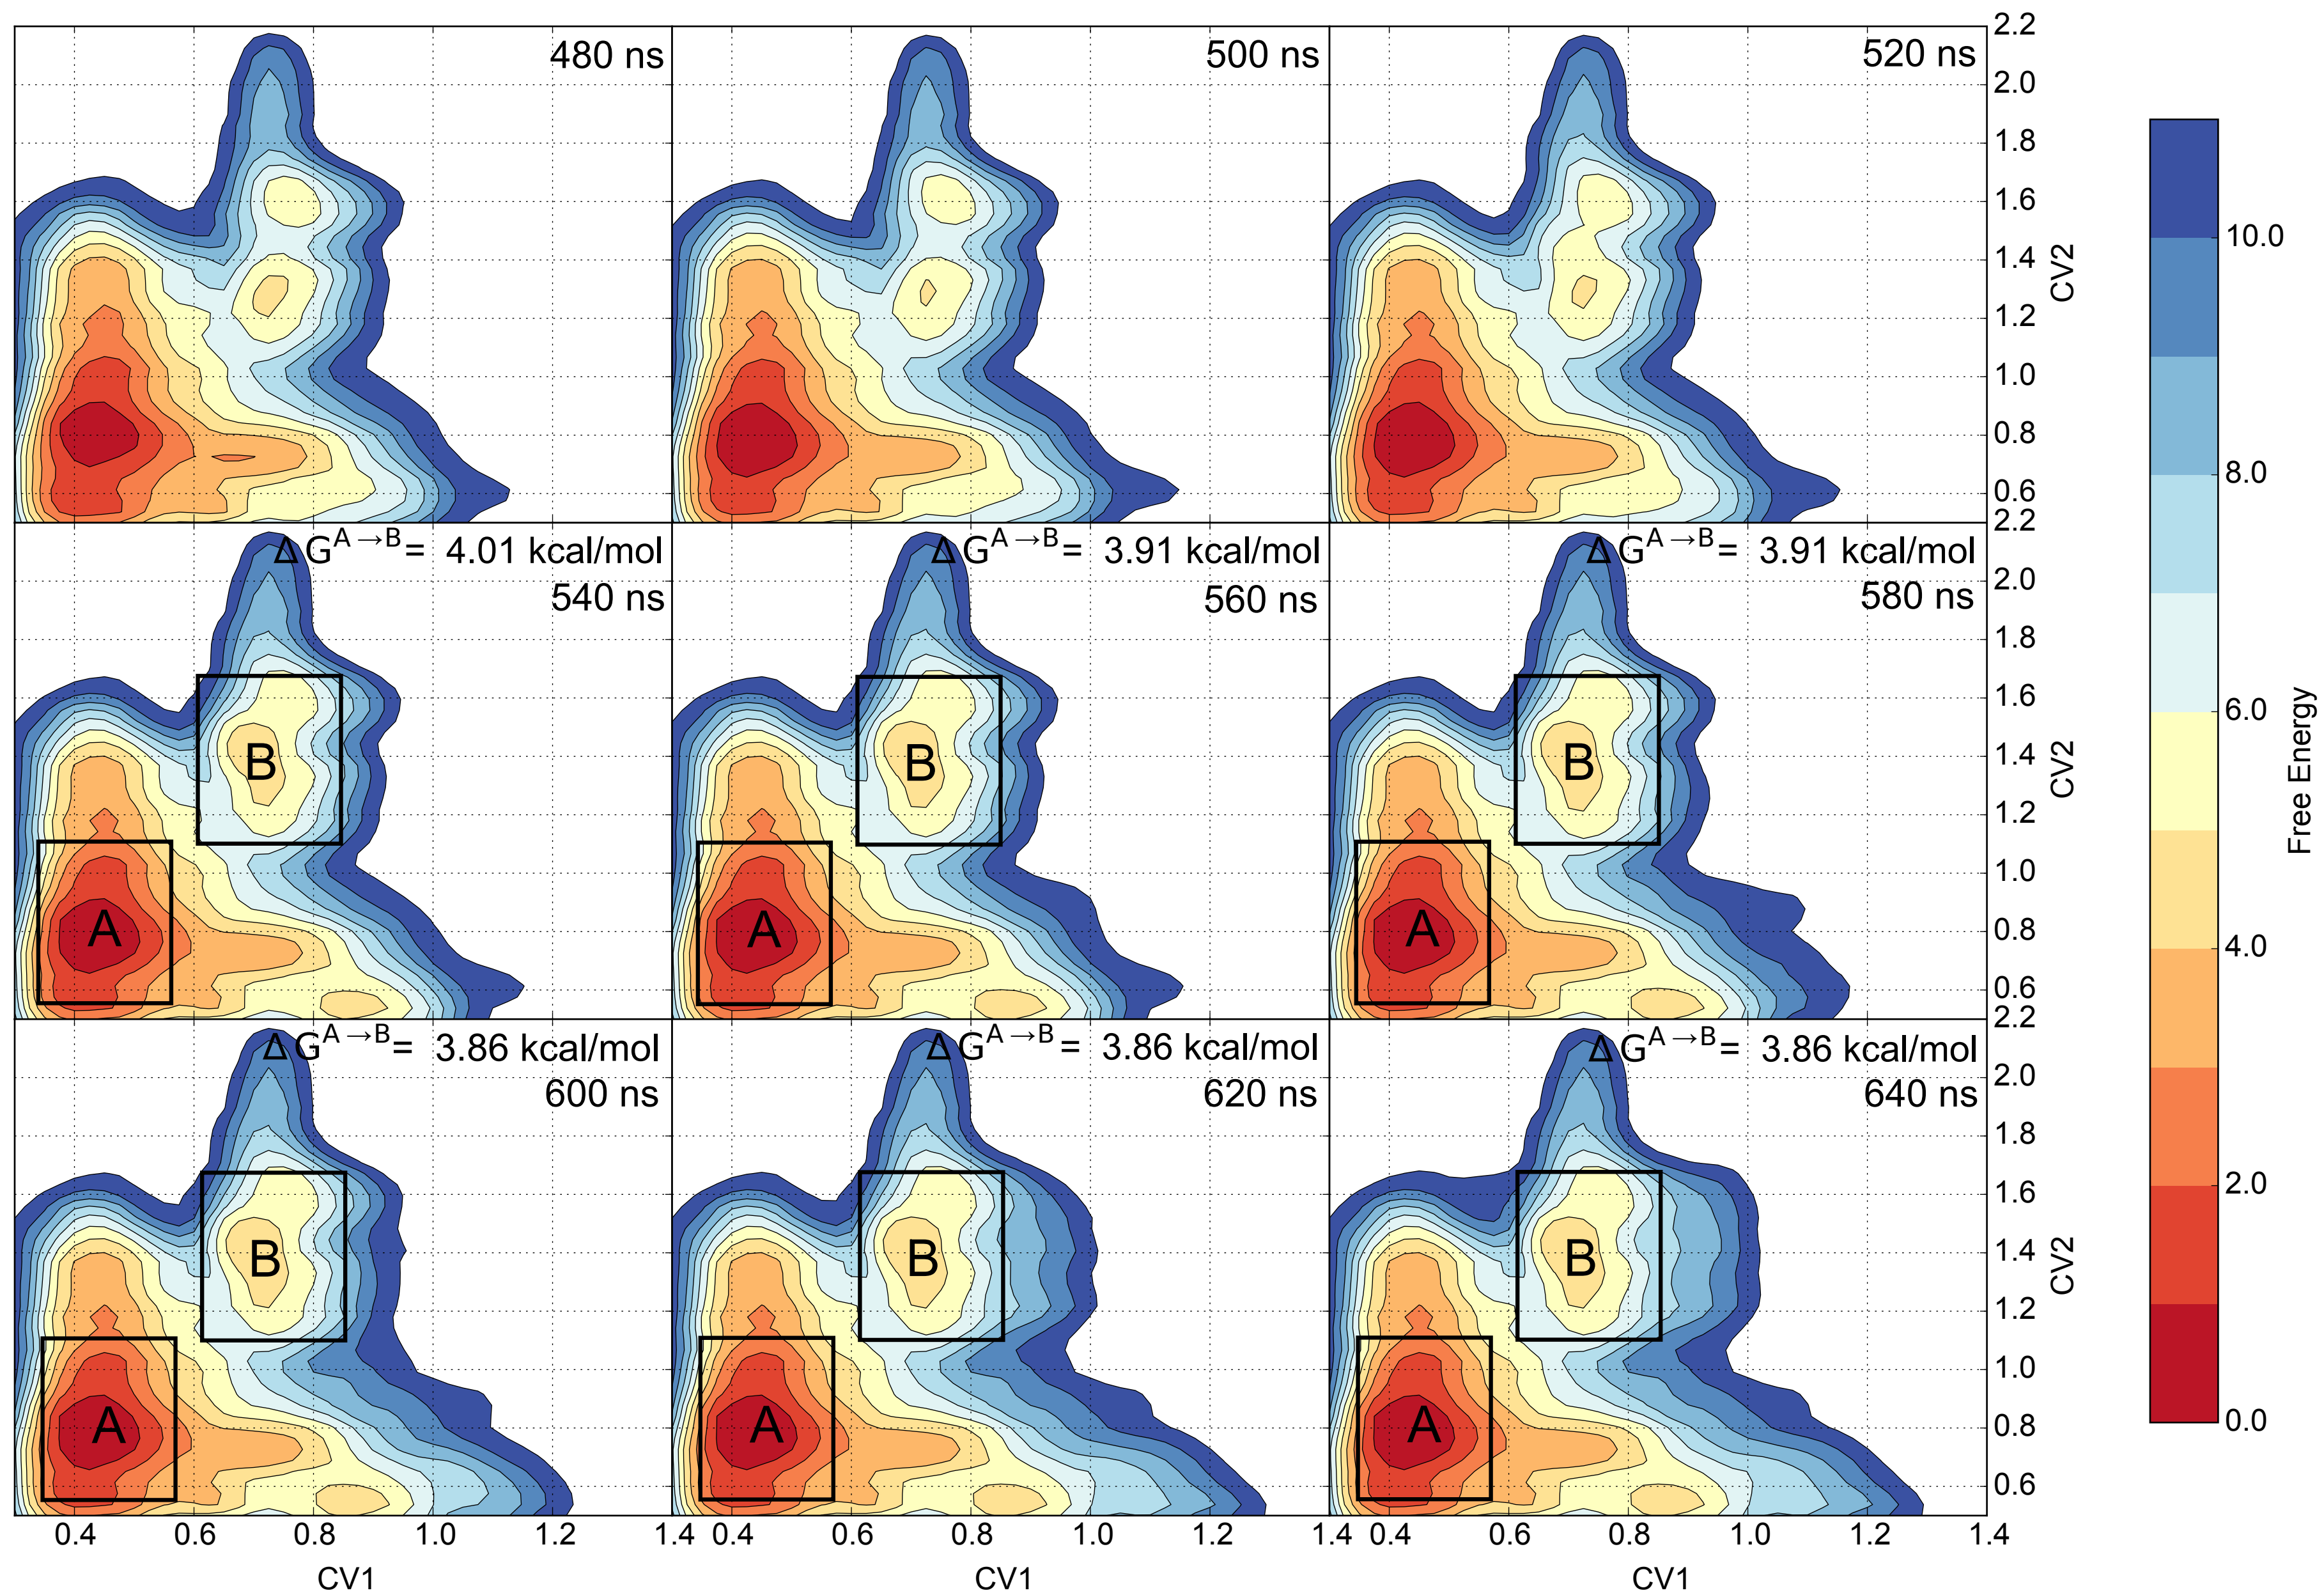

Supplement: Supplementary file 1 [file 1 › S14_Fig.pdf]

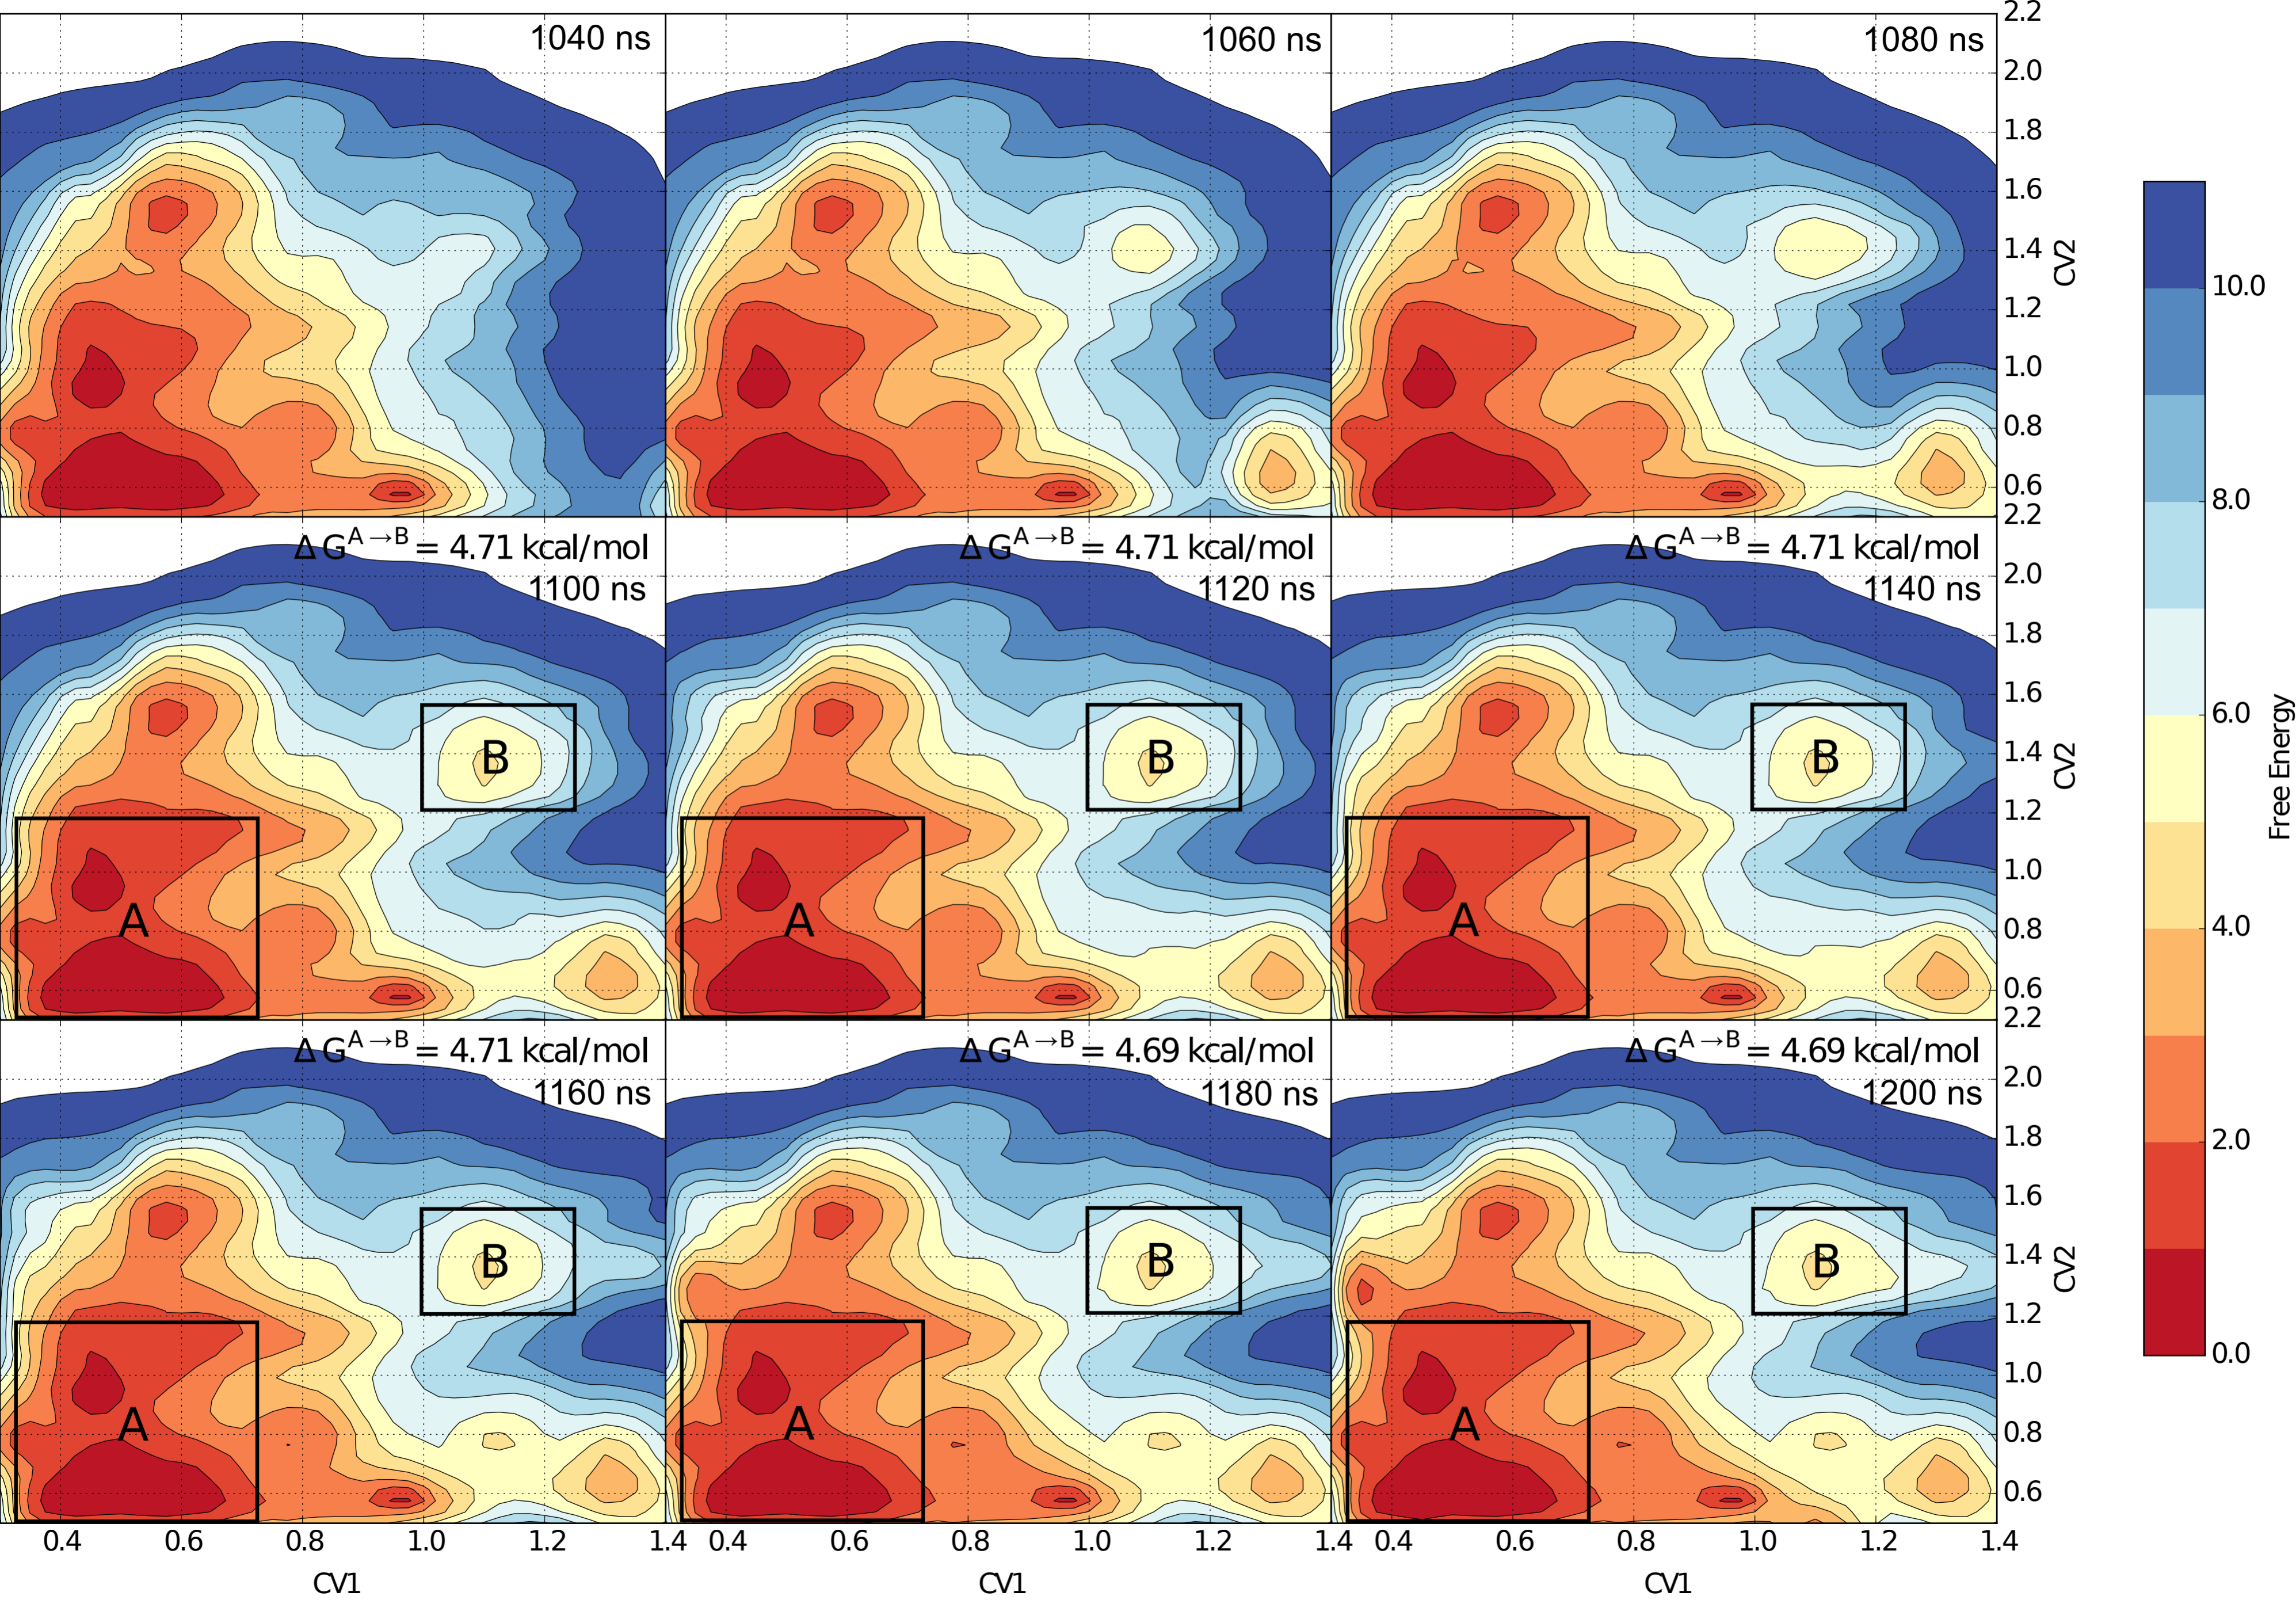

Supplement: Supplementary file 1 [file 1 › S15_Fig.pdf]

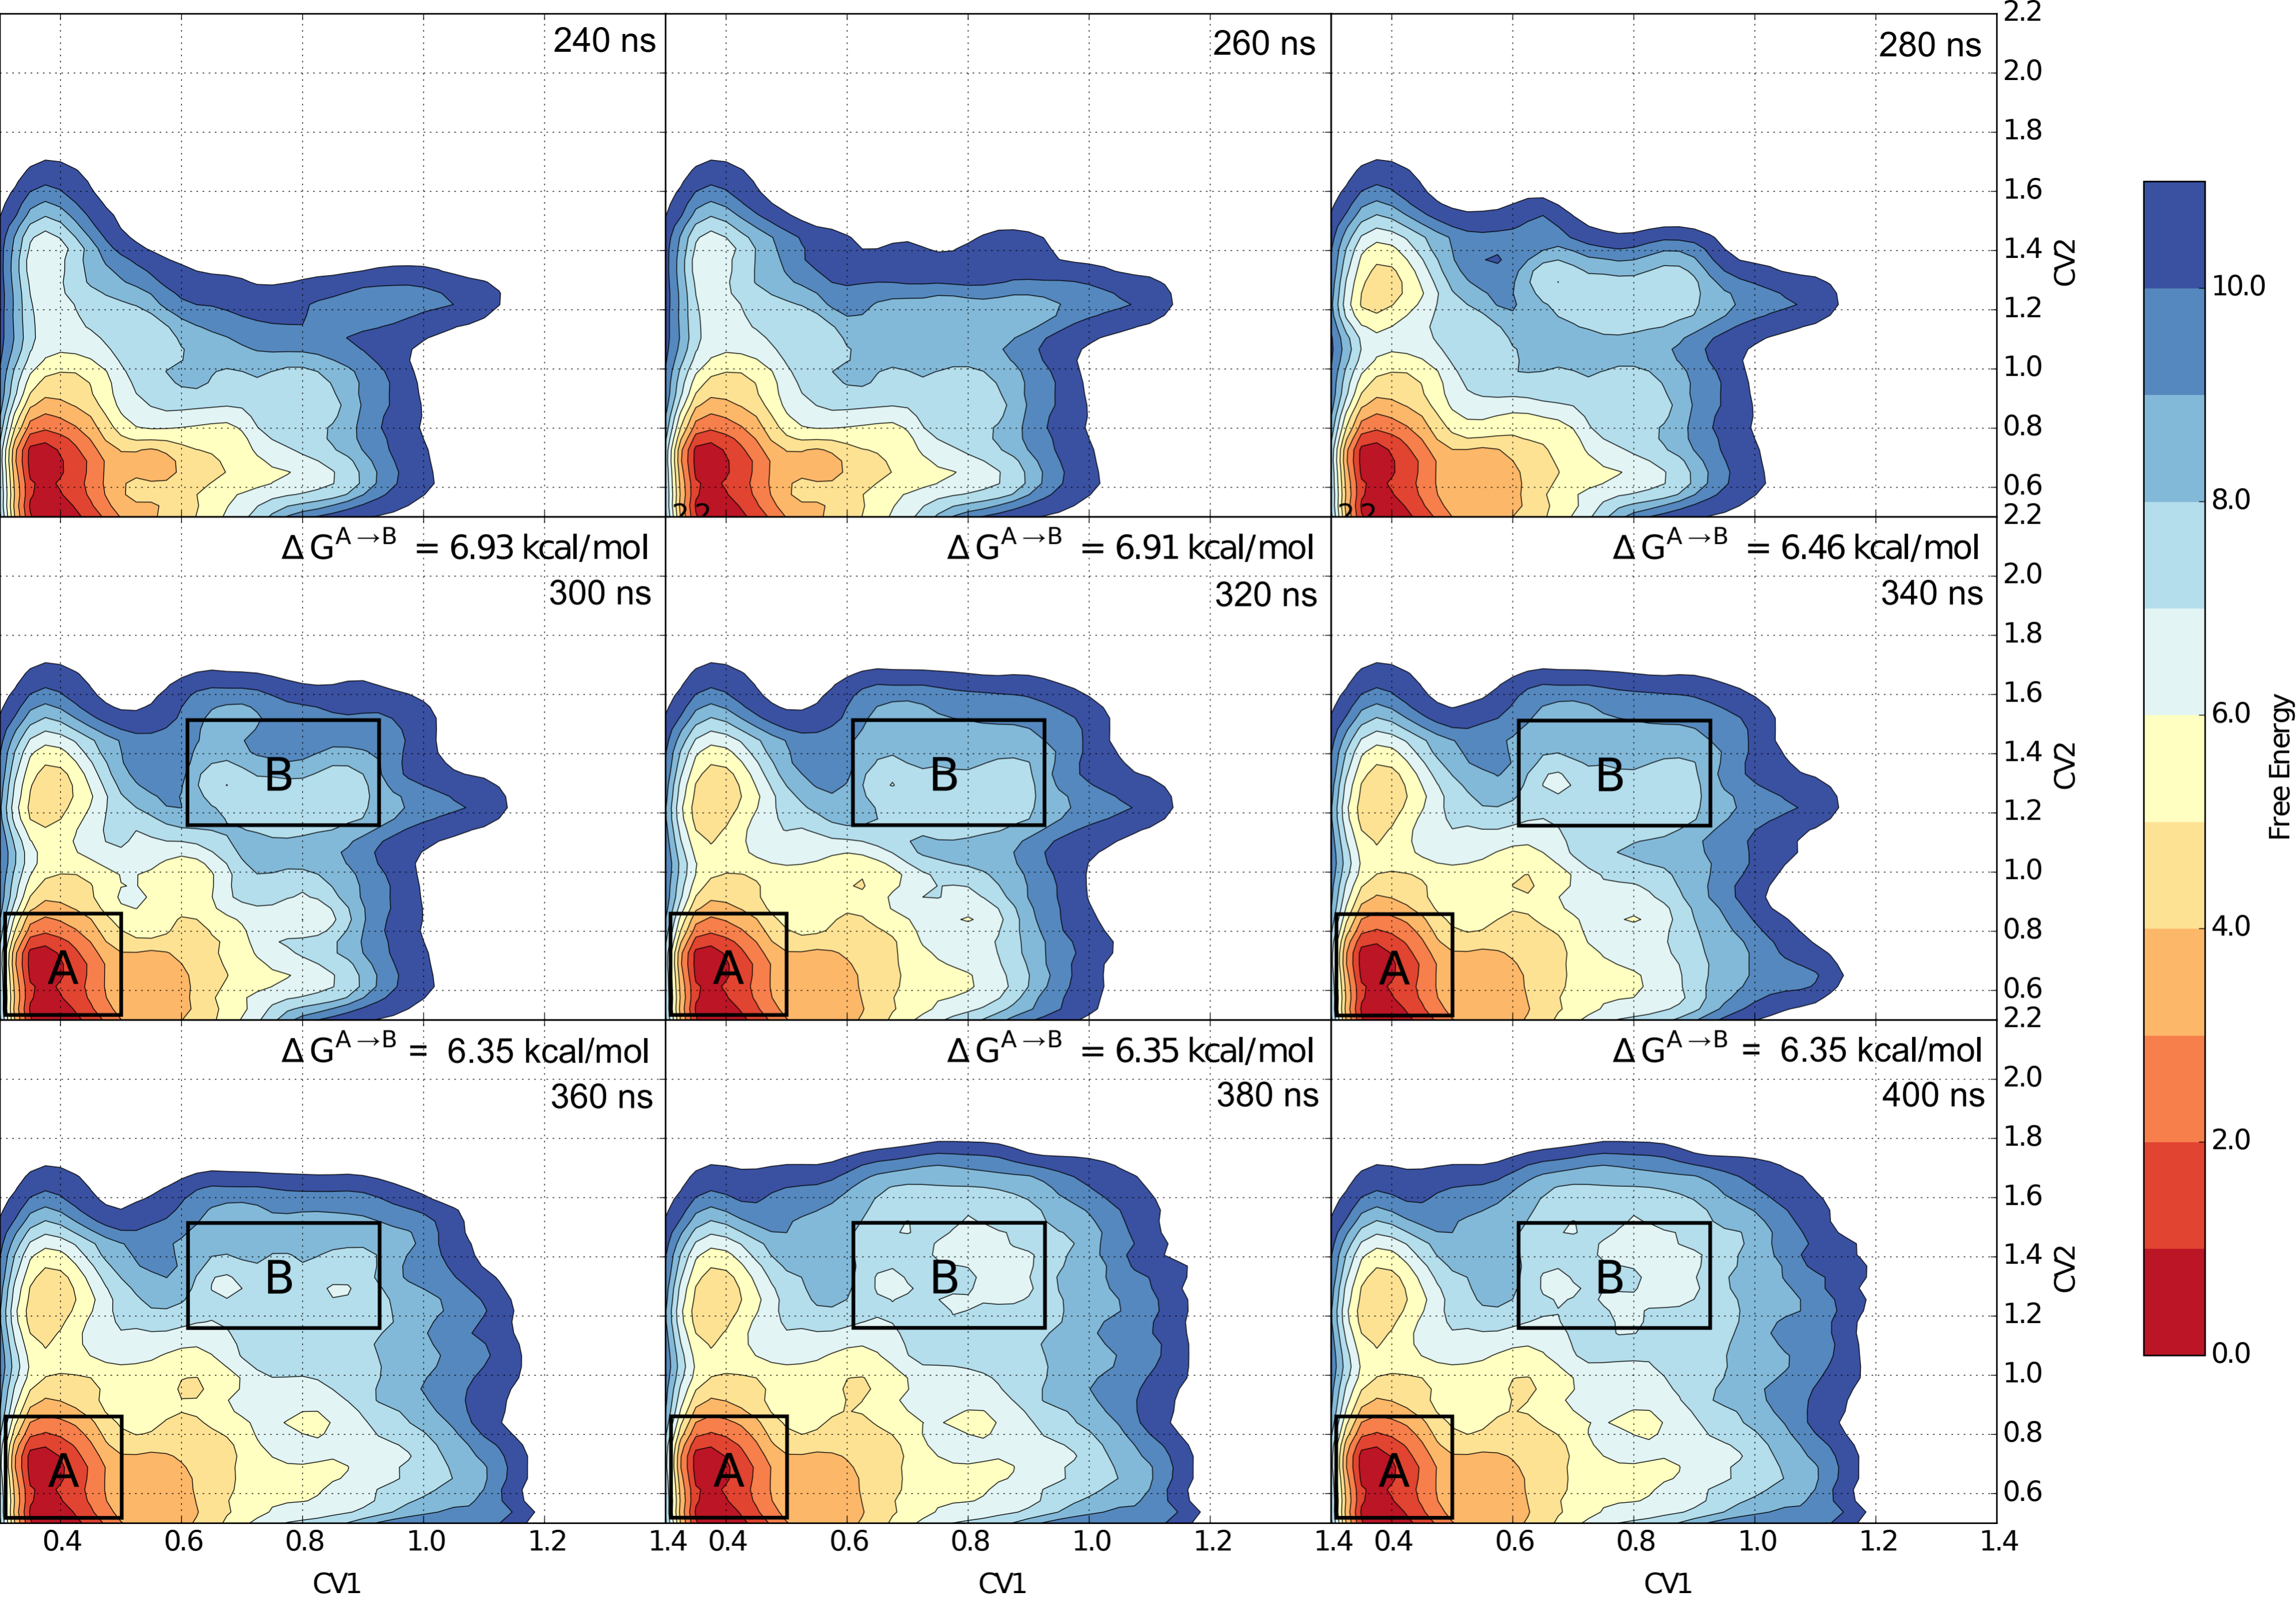

Supplement: Supplementary file 1 [file 1 › S16_Fig.pdf]

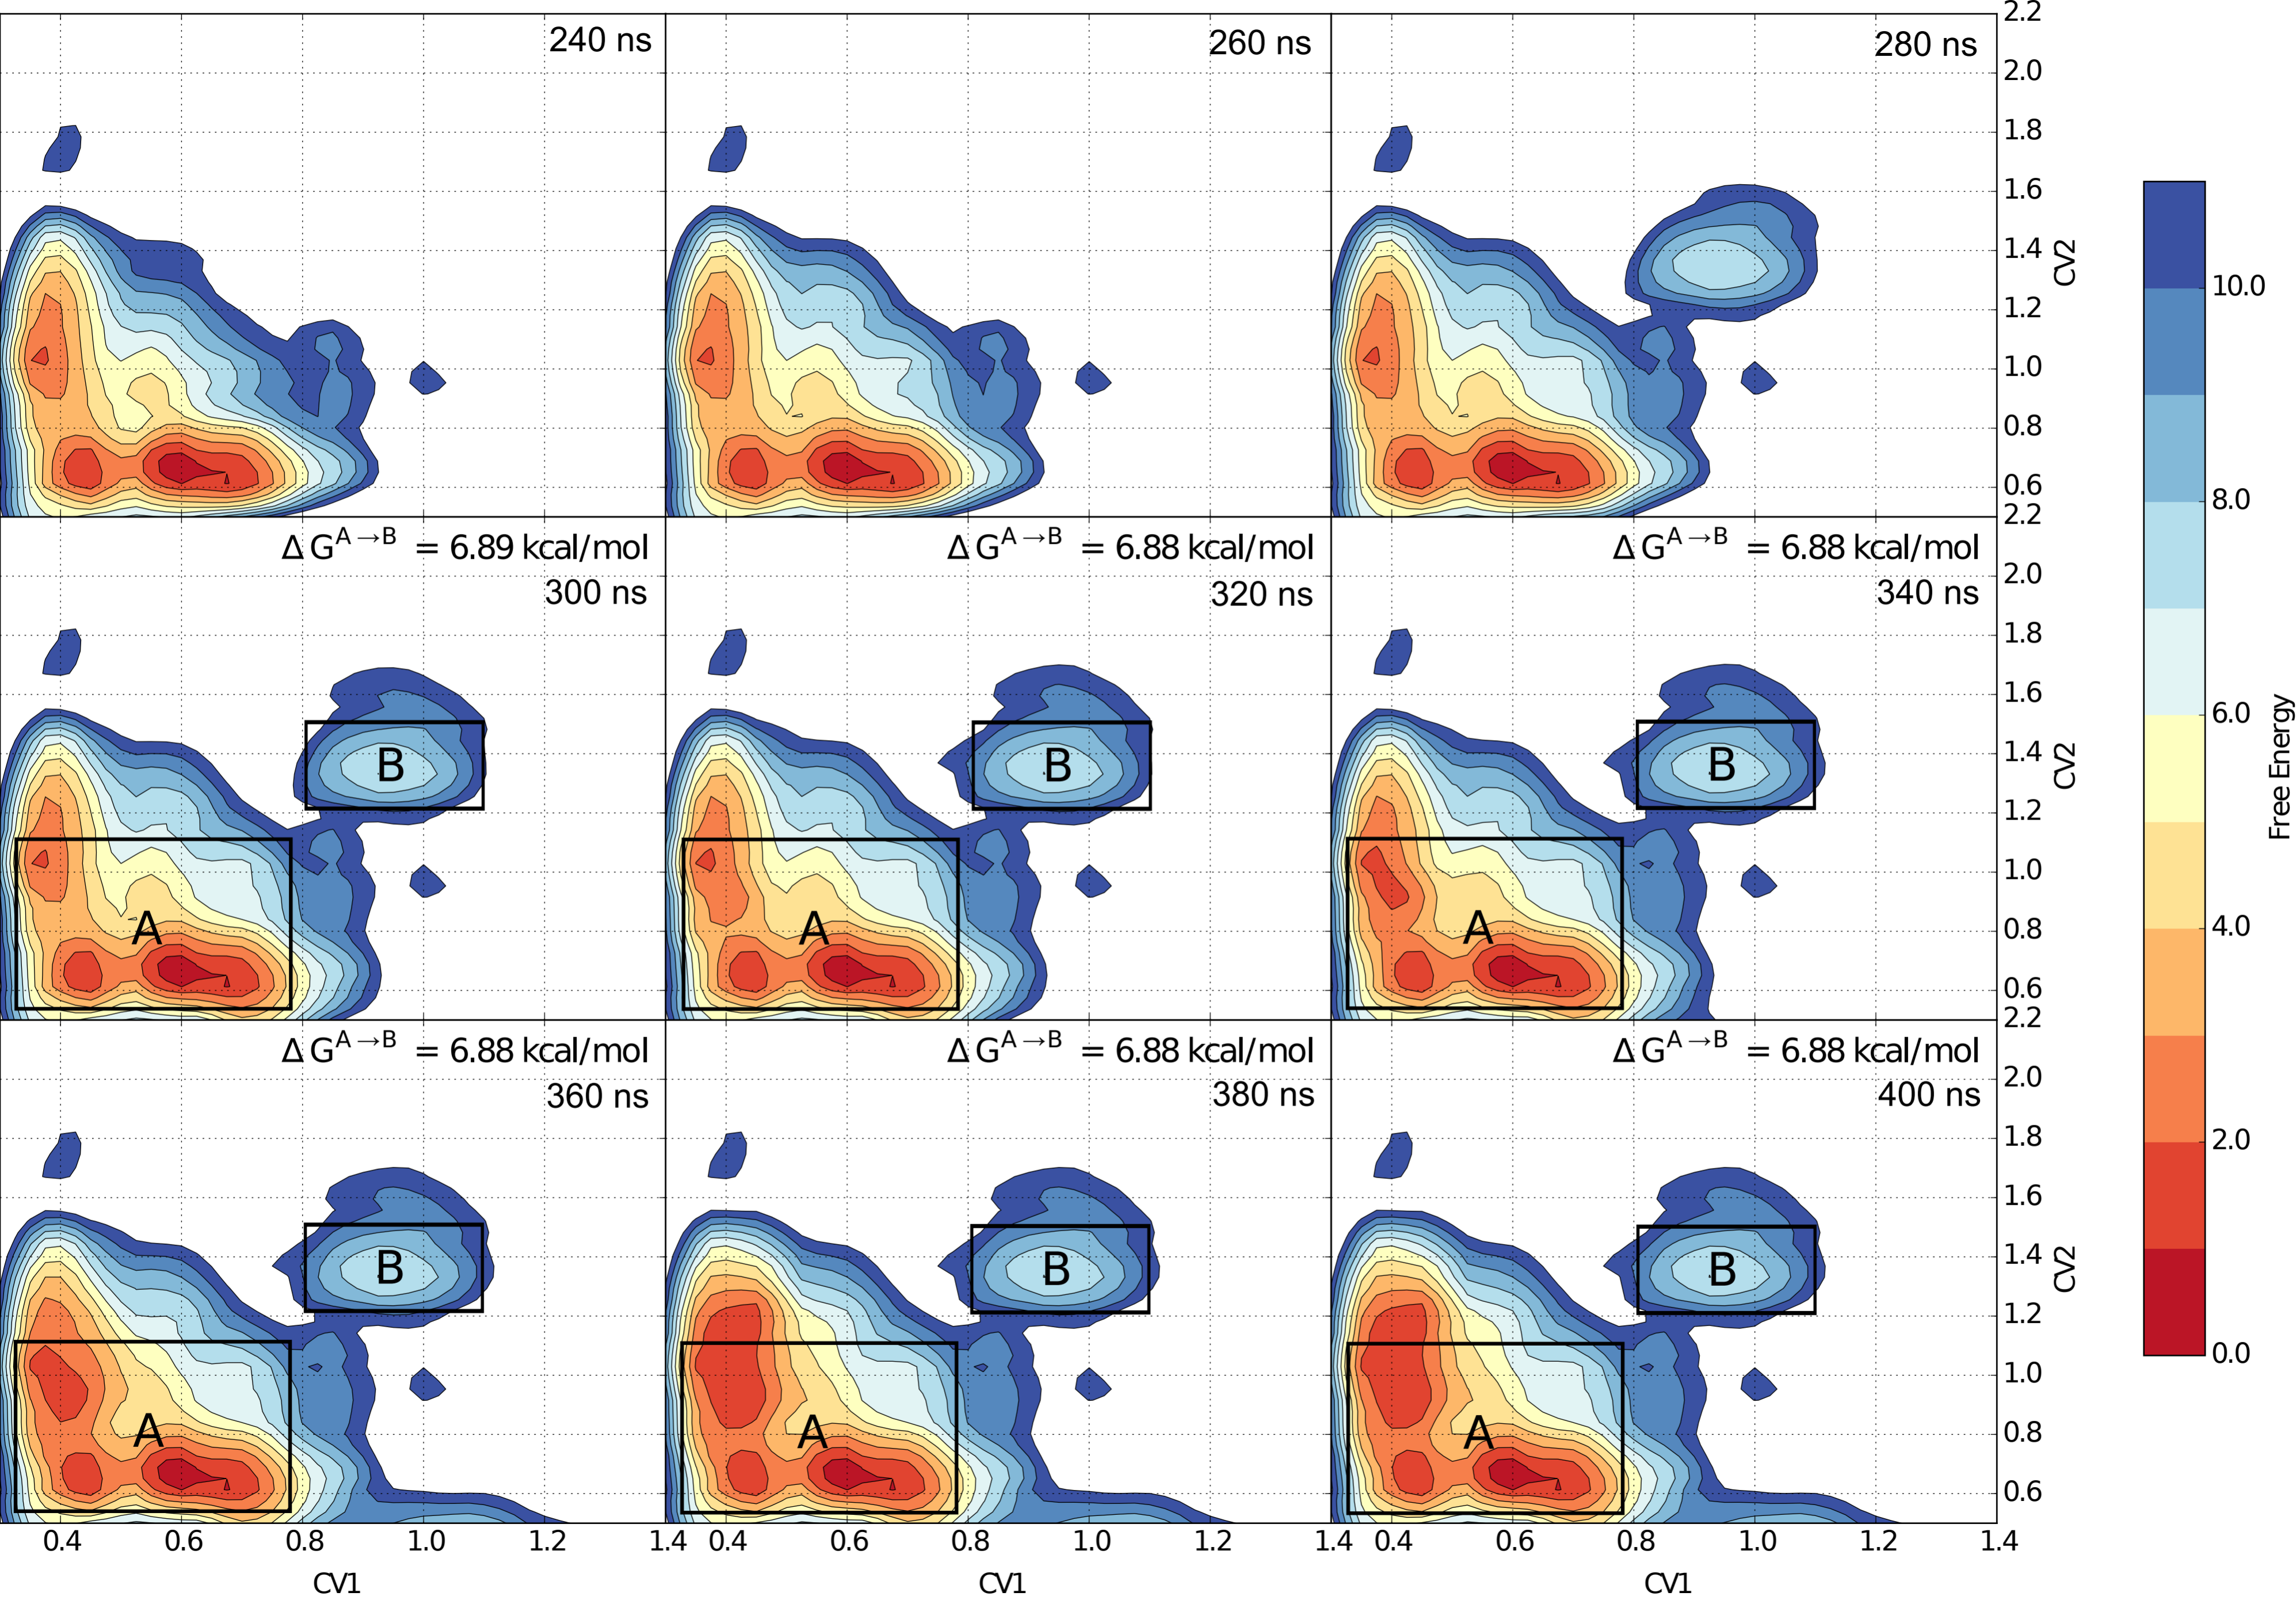

Supplement: Supplementary file 1 [file 1 › S17_Fig.pdf]

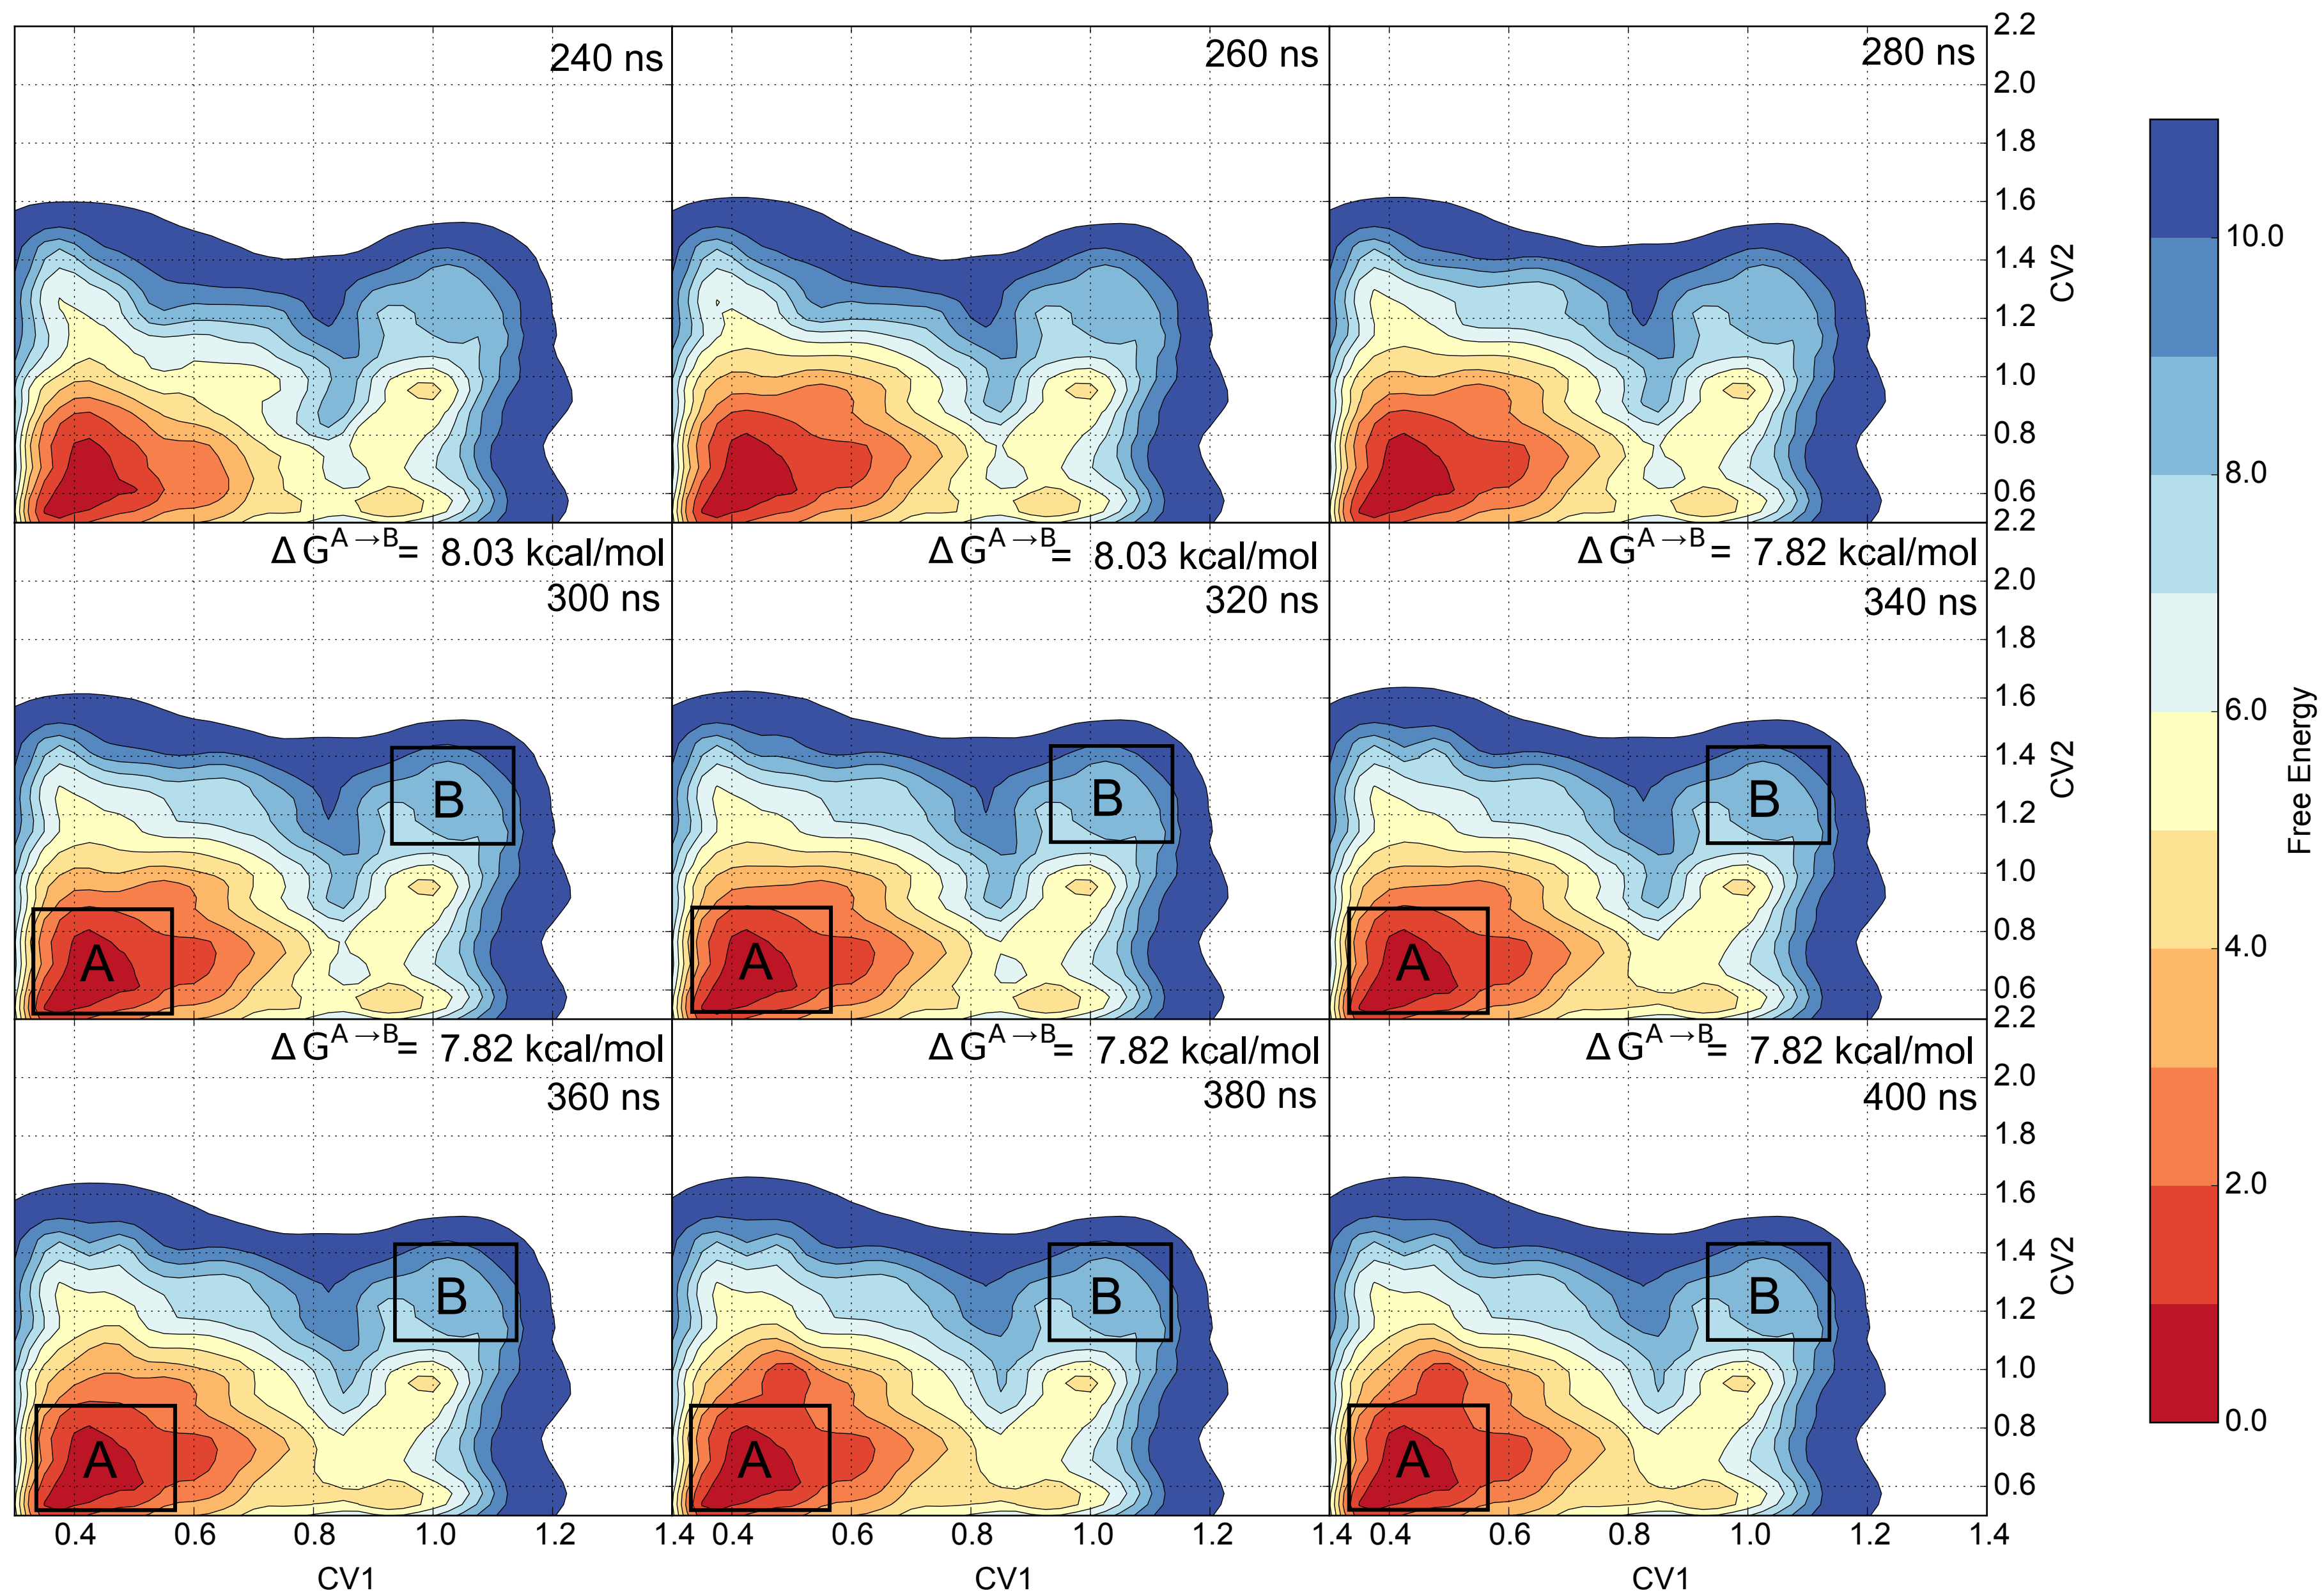

Supplement: Supplementary file 1 [file 1 › S18_Fig.pdf]
